# Supplementary material
Source: PubMed Central journal article supplement (PMC5357574)
Supplement: NIHMS70580-supplement-Supplemental_material.pdf [file NIHMS70580-supplement-Supplemental_material.pdf]

A method for identifying genetic heterogeneity within  
phenotypically-defined disease subgroups  
Supplementary Note

James Liley, John A Todd and Chris Wallace

November 8, 2016



# Contents

|          |                                                                                   |           |
|----------|-----------------------------------------------------------------------------------|-----------|
| <b>1</b> | <b>Disease models in <math>H_1</math> and <math>H_0</math></b>                    | <b>5</b>  |
| 1.1      | Disease models in $H_1$ . . . . .                                                 | 5         |
| 1.2      | Disease models in $H_0$ . . . . .                                                 | 6         |
| 1.3      | Subgrouping by a risk factor . . . . .                                            | 6         |
| <b>2</b> | <b>Distribution of Z scores</b>                                                   | <b>9</b>  |
| 2.1      | Definitions . . . . .                                                             | 9         |
| 2.1.1    | Unstratified groups . . . . .                                                     | 9         |
| 2.1.2    | Adjustment for strata . . . . .                                                   | 10        |
| 2.1.3    | Adjustment for covariates . . . . .                                               | 11        |
| 2.2      | $Z_d$ and $Z_a$ are conditionally independent in categories 1 and 2 . . . . .     | 13        |
| 2.2.1    | Unstratified or stratified groups . . . . .                                       | 13        |
| 2.2.2    | Adjustment for covariates . . . . .                                               | 13        |
| 2.3      | SNPs in category 3 . . . . .                                                      | 13        |
| 2.3.1    | Unstratified groups . . . . .                                                     | 14        |
| 2.3.2    | Adjustment for strata . . . . .                                                   | 15        |
| 2.3.3    | Adjustment for covariates . . . . .                                               | 16        |
| 2.4      | Unequal subgroup prevalences . . . . .                                            | 16        |
| 2.4.1    | Motivation . . . . .                                                              | 16        |
| 2.4.2    | Behaviour of standard approach . . . . .                                          | 16        |
| 2.4.3    | Adaptation . . . . .                                                              | 18        |
| 2.4.4    | No adjustment - unbiased sampling . . . . .                                       | 18        |
| 2.4.5    | Adjustment for strata . . . . .                                                   | 19        |
| 2.4.6    | Adjustment for covariates . . . . .                                               | 19        |
| 2.5      | Testing procedure . . . . .                                                       | 20        |
| 2.5.1    | Algorithm . . . . .                                                               | 20        |
| 2.5.2    | Rationale . . . . .                                                               | 21        |
| <b>3</b> | <b>Details of simulations</b>                                                     | <b>25</b> |
| 3.1      | Simulations of random genotypes . . . . .                                         | 25        |
| 3.2      | Simulation on GWAS case group subgroups . . . . .                                 | 26        |
| 3.3      | Distributions of parameter values for simulation and power calculations . . . . . | 27        |
| <b>4</b> | <b>Genetic correlation as an alternative to PLR test</b>                          | <b>31</b> |
| 4.1      | Overview . . . . .                                                                | 31        |
| 4.2      | Method 1: control-subgroup 1 vs control-subgroup 2 . . . . .                      | 31        |
| 4.2.1    | Expected behaviour . . . . .                                                      | 31        |
| 4.2.2    | Simulations . . . . .                                                             | 32        |
| 4.2.3    | Application to real data . . . . .                                                | 32        |
| 4.3      | Method 2: $Z_d$ (case vs control) vs $Z_a$ (subgroup 1 vs 2) . . . . .            | 33        |

|          |                                                                             |           |
|----------|-----------------------------------------------------------------------------|-----------|
| 4.3.1    | Expected behaviour, and relation of $\rho_g$ to $\rho$ . . . . .            | 33        |
| 4.3.2    | Simulations . . . . .                                                       | 35        |
| 4.3.3    | Application to real data . . . . .                                          | 35        |
| <b>5</b> | <b>Other</b> . . . . .                                                      | <b>41</b> |
| 5.1      | Alternative test statistics for retrospective single-SNP analysis . . . . . | 41        |
| 5.2      | Independence of PLR distribution on subgroup sizes . . . . .                | 42        |
| 5.3      | Number of simulations necessary to fit null distribution . . . . .          | 42        |

# Note 1

## Disease models in $H_1$ and $H_0$

We define ‘differential causative pathology’ (our alternative hypothesis,  $H_1$ ) to mean that some subset of disease-associated variants have different population effect sizes in the case subgroups in question. Our method tests against the null hypothesis  $H_0$  that all disease associated variants have the same effect sizes in both subgroups. An equivalent formulation of  $H_0$  is that the (possibly empty) sets of SNPs which have different minor allele frequencies in case and control groups and which have different minor allele frequencies in case subgroups are non-intersecting.

The multitude of potential causes for disease heterogeneity necessitate that both  $H_0$  and  $H_1$  encompass a range of such causes. We list several below, with illustration in supplementary table 1.

We define the ‘genetic architecture’ of a trait as a set of variants and corresponding effect sizes (log-odds ratios or asymptotically similar statistics) between populations with and without the trait. In general, most effect sizes are zero or negligibly small.

### 1.1 Disease models in $H_1$

The simplest model of disease heterogeneity in  $H_1$  is the scenario in which some variants are associated with one case subgroup, but not the other. For such a variant the effect size in one subgroup is zero, and in the other nonzero. This would be expected to arise if some of the pathological processes giving rise to the disease were specific to one case subgroup.

A second potential model in  $H_1$  is when the same variants are associated with both subgroups, but the relative effect sizes differ. This may arise in a situation where pathological processes differ in relative impact between subgroups. For instance, if two pathological processes may lead to a disease of interest, and one process is likely to occur during the neonatal period while the another is likely to occur during adolescence, a division of a case group into neonatal-onset and adolescent-onset would likely show variants associated with the first process as being more important in the first subgroup, and variants associated with the second process as being more important in the second, although the set of associated variants may be the same in both subgroups. The scenario may also arise if the cases can be split into subgroups like those described in the first paragraph, but the subgrouping criterion is only an approximation to this split.

A third model is when the same variants are associated with both subgroups with but where the effect sizes in one subgroup are a constant factor larger than in the other subgroup. This corresponds to differential heritability between subgroups, with the same pathological processes present. In a liability threshold model where some environmental variable has an additive effect with genetic risk, we would expect that defining subgroups based on the environmental variable would lead to this scenario (figure 1.1). In this case, the environment modulates the effect of the genetic risk. As an example, under the assumption that a dietary risk factor has an additive effect with genetic risk factors in type 2 diabetes, a disease subgroup with the dietary risk factor would be expected to have lower disease heritability than a subgroup

without it.

## 1.2 Disease models in $H_0$

Under  $H_0$ , all disease associated variants have the same effect size in both subgroups. This may take the form of an absence of any systematic genetic difference between case subgroups, in which case the population allelic frequencies of disease-associated SNPs, and hence the effect sizes of such SNPs between controls and each case subgroup, are equal.

Hypothesis  $H_0$  also allows the presence of genetic differences between subgroups at different SNPs to those associated with the disease. This may be particularly prominent if variation in the disease depends on how the disease process acts on different individual physiologies, in which case genetic variation between subgroups is at different SNPs to those involved in disease causality.

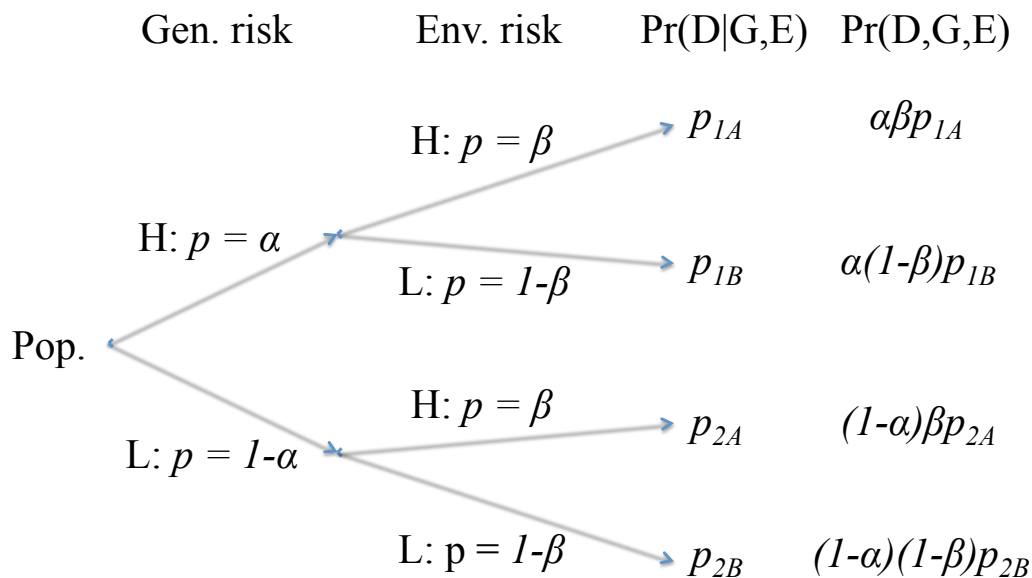

Figure 1.1: In a simplistic disease model, we consider two levels of genetic risk  $G$  with frequencies  $\alpha$ ,  $1 - \alpha$  and an independent two-level environmental risk factor  $E$  with frequencies  $\beta$ ,  $1 - \beta$ , and a disease  $D$ . In cases with the environmental risk factor, we would expect the ratio of high-genetic risk to low-genetic risk cases to be  $\frac{\alpha}{1-\alpha} \frac{p_{1A}}{p_{2A}}$ , and in cases without,  $\frac{\alpha}{1-\alpha} \frac{p_{1B}}{p_{2B}}$ . Assume we define subgroups based on the environmental risk factor. If the risk factor has a multiplicative effect on  $Pr(D|G, E)$ , so  $\frac{p_{1A}}{p_{2A}} = \frac{p_{1B}}{p_{2B}}$ , the prevalences of genetic risk groups are identical in the groups, and the heritability of  $D$  is the same. If the effect of the environmental risk factor on  $Pr(D|G, E)$  changes with  $G$ , so the environmental risk factor modulates the genetic risk, this will not hold.

## 1.3 Subgrouping by a risk factor

Partitioning a case group by a known disease risk factor may lead to subgroupings in either  $H_0$  or  $H_1$  dependent on the interaction between the genetic and environmental risk factors. If the risk factor on which the subgrouping is based has a multiplicative effect on disease risk with genetic factors, then we expect the subgrouping to be in  $H_0$  (figure 1.1). This may take the form of a binary risk factor: if a disease is triggered by an environmental event (for example, a particular mutation driven by environmental

mutagens), with susceptibility to that event determined genetically (for instance, impaired ability to repair the mutation), conditioning on environment will not affect the distribution of genetic risk, and the subgrouping will be in  $H_0$ . The genetic risk may also be binary; for example, the development of a disease may require the knockout of a particular cellular process, with the genetic risk for the disease solely involved in risk of the knockout.

However, deviation from a locally multiplicative model can also lead to a subgrouping in  $H_1$ . One instance this may occur is if disease risk approaches 1. A current model of T1D pathogenesis requires the presence of an environmental insult to trigger genetic susceptibility ([1]), which could be expected to lead to a locally multiplicative relationship between age-at-diagnosis and genetic risk (figure 1.2). However, if genetic risk can be high enough that some individuals are almost sure to get the disease, this will lead to the subgrouping being in  $H_1$  - a potential reason for the observation regarding age-at-diagnosis in T1D in the main text.

Finally, cases may be subgrouped according to non-causative clinical disease associations. Assume some binary clinical marker  $M$  has non-zero frequency in healthy individuals and has some set of associated genetic variants  $G_0$ . Let  $D$  be a genetically homogenous disease with a set of associated variants  $G_1$  such that  $G_0 \cap G_1 = \emptyset$  and  $D$  (or a necessary precursor of  $D$ ) probabilistically causes  $M$  to occur more often than in the general population. Then when we condition on case status (and hence any necessary precursors of  $D$ ) the only variants which are associated with  $M$ -status in cases will be in  $G_0$ , and a subgrouping based on  $M$  will be in  $H_0$ , despite  $M$  being associated with  $D$ . If, however, subtypes of  $D$  with differential genetic basis induce  $M$  to different degrees, and hence  $M$  serves as an index of such subtypes of  $D$ , then a subgrouping of  $M$  will fall in  $H_1$ .

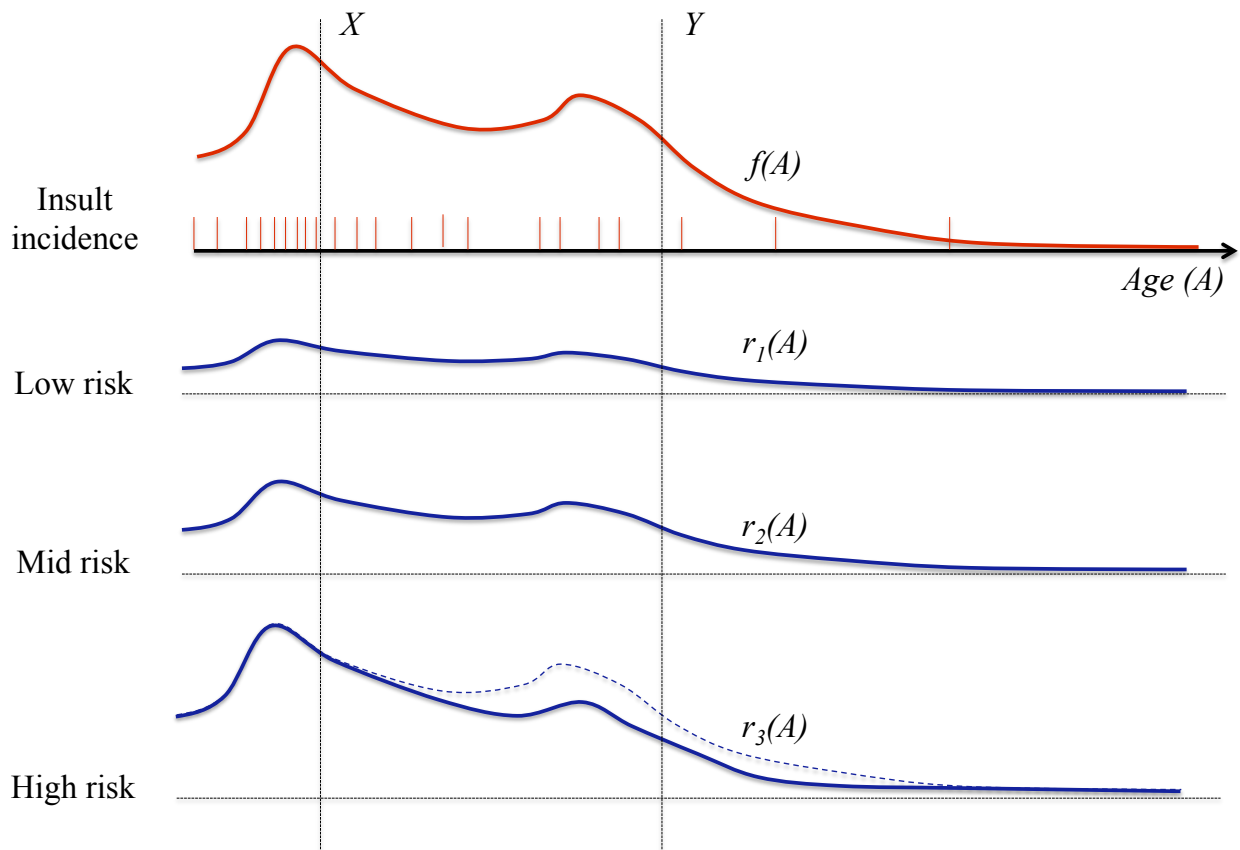

Figure 1.2: In a simplified model of incidence of type 1 diabetes or a similar autoimmune disease, we consider the disease to be triggered by an environmental ‘insult’; for instance (eg, a viral illness) and three levels of genetic susceptibility to such insults. Denoting by  $f(A)$  the density of such insults at age  $A$  (red vertical lines show a possible example for one individual), we expect that for individuals at low or moderate genetic risk the densities  $r_1(A)$ ,  $r_2(A)$  of disease incidence are proportional to  $f(A)$ , with lifetime risk  $\int r_1(A)dA$ ,  $\int r_2(A)dA$  respectively. The risk of disease at age  $A$  can be considered a product of  $f(A)$  and a genetic risk score. In a high-risk group for a disease such as type 1 diabetes, it is possible that the lifetime risk  $\int r_3(A)dA$  approaches 1, the high-risk group becomes ‘saturated’ with disease cases, and there are fewer non-affected individuals in the group at higher age groups, leading to a lower constant of proportionality with  $f(A)$  at higher ages (dotted/solid lines). In the absence of the high-risk group, a subgrouping of patients into those with age-at-onset  $X$  and those with age-at-onset  $Y$  (vertical lines) would be expected to contain the same proportion of low- and mid- genetic risk samples in each subgroup, with correspondingly equal heritability of disease in each subgroup. With the high-risk group, the multiplicative effect of  $f(A)$  on disease risk breaks down, inducing an environmental influence on the genetic risk, and changing the heritability between groups.



## Note 2

# Distribution of Z scores

In this section, we define the test statistics (Z scores) used to characterise allelic differences between groups and describe the rationale for our probabilistic model.

We partition SNPs into three theoretical categories:

1. SNPs which are not associated with case/control status or case subgroup status
2. SNPs which are associated with the main phenotype but have the same effect size in both case subgroups
3. SNPs which are associated with the difference between case subgroups

We consider SNP effect sizes between subgroups and between cases and controls to be realisations of bivariate random variables, which have different distributions in each category.

## 2.1 Definitions

### 2.1.1 Unstratified groups

Let  $x$  be a random sample of size  $n_x$  from patient population X, and  $y$  a sample of size  $n_y$  from a population Y. Denote by  $m_x, m_y$  the allele frequencies of some SNP of interest in  $x$  and  $y$ , and by  $\mu_x, \mu_y$  the allele frequencies in X and Y. We assume for the moment that  $x$  and  $y$  are unbiased samples, so  $\mu_x = E(m_x)$  and  $\mu_y = E(m_y)$ .

In general, we compute Z scores from GWAS -defined p-values  $P_{xy}$  using the formula

$$Z_{n_x, n_y}(m_x, m_y) = -\Phi^{-1}(P_{xy}/2) \text{sign}(m_x - m_y) \quad (2.1)$$

Although there are several ways in which a GWAS p-value may be computed, the resultant Z scores all have several common asymptotic properties. In general, we assume a Z score  $Z_{n_x, n_y}(m_x, m_y)$  is a smooth function of allele frequencies  $m_x, m_y, n_x, n_y$  with the following properties

1. For fixed observed overall allele frequency  $\frac{n_x m_x + n_y m_y}{n_x + n_y}$ ,  $Z_{n_x, n_y}(m_x, m_y)$  is monotonic to the allelic difference  $m_x - m_y$
2. Under the null hypothesis  $\mu_x = \mu_y$ ,
  - (a)  $E(Z_{n_x, n_y}(m_x, m_y)) = 0$
  - (b)  $\text{var}(Z_{n_x, n_y}(m_x, m_y)) = 1$
  - (c)  $Z_{n_x, n_y}(m_x, m_y) \rightarrow_d N(0, 1)$  as  $n_x, n_y \rightarrow \infty$

These properties imply that the first-order expansion of  $Z$  about  $(m_x, m_y) = (\mu, \mu)$  is:

$$Z_{n_x, n_y}(m_x, m_y) = \sqrt{\frac{2n_x n_y}{n_x + n_y}} \frac{m_x - m_y}{\sqrt{\mu(1-\mu)}} + O((m_x - \mu)(m_y - \mu)) \quad (2.2)$$

since

$$\begin{aligned} \sqrt{2n_x}(m_x - \mu_x) &\rightarrow_d N(0, \mu_x(1 - \mu_x)) \\ \sqrt{2n_y}(m_y - \mu_y) &\rightarrow_d N(0, \mu_y(1 - \mu_y)) \end{aligned} \quad (2.3)$$

and if  $\mu_x = \mu_y = \mu$

$$\sqrt{\frac{2n_x n_y}{n_x + n_y}} \frac{m_x - m_y}{\sqrt{\mu(1-\mu)}} \rightarrow_d N(0, 1) \quad (2.4)$$

and only one linear function of  $m_x, m_y$  can be asymptotically  $N(0, 1)$ .

If  $\mu_x \neq \mu_y$  and

$$\lambda = \frac{\mu_x - \mu_y}{\sqrt{\frac{\mu_x(1-\mu_x)}{2n_x} + \frac{\mu_y(1-\mu_y)}{2n_y}}} \quad (2.5)$$

remains finite as  $n_x, n_y \rightarrow \infty$ , we have

$$\begin{aligned} Z_{n_x, n_y}(m_x, m_y) &\approx \frac{m_x - m_y}{\sqrt{\frac{m_x(1-m_x)}{2n_x} + \frac{m_y(1-m_y)}{2n_y}}} \\ &= \frac{(m_x - m_y) - (\mu_x - \mu_y)}{\sqrt{\frac{m_x(1-m_x)}{2n_x} + \frac{m_y(1-m_y)}{2n_y}}} + \frac{\mu_x - \mu_y}{\sqrt{\frac{m_x(1-m_x)}{2n_x} + \frac{m_y(1-m_y)}{2n_y}}} \\ &\rightarrow_d N(0, 1) + \lambda \\ &= N(\lambda, 1) \end{aligned} \quad (2.6)$$

For a randomly chosen SNP, let  $\mu_c$  be the population allele frequency (AF) in controls, and  $\mu_1, \mu_2$  the population AFs in case subgroups 1 and 2 respectively, for the same allele. Define  $\nu$  as the relative prevalence of subgroup 1 and  $1 - \nu$  as the relative prevalence of subgroup 2. The population AF across all cases is  $\mu_{12} = \nu\mu_1 + (1 - \nu)\mu_2$ .

Denote by  $m_c, m_1, m_2$  the corresponding observed AFs in a study with  $n_c, n_1, n_2$  controls and samples in subgroup 1 and subgroup 2 respectively. Define  $m_{12} = \frac{n_1 m_1 + n_2 m_2}{n_1 + n_2}$  as the AF in the whole case group and  $n_{12} = n_1 + n_2$ . We assume that  $\frac{n_1}{n_1 + n_2} \approx \nu$ ; that is, the case group is an unbiased sample of the case population. We later describe how this assumption can be relaxed.

The values  $Z_a$  and  $Z_d$  are defined as

$$Z_d = Z_{n_1, n_2}(m_1, m_2) \quad (2.7)$$

$$Z_a = Z_{n_1 + n_2, n_c}(m_{12}, m_c) \quad (2.8)$$

### 2.1.2 Adjustment for strata

If the distribution of some categorical variable (for example, country of origin) associated with allele frequency varies systematically between  $x$  and  $y$ , stratification may be needed when computing GWAS p-values. This may mean that  $E(m_x) \neq E(m_y)$ , even if the expected allele frequency is the same in  $x$  and  $y$  in each stratum.

Assume  $x$  is divided into  $k$  strata  $1..k$ , and let  $n_x^1, n_x^2, \dots, n_x^k$  be the number of samples,  $m_x^1, m_x^2, \dots, m_x^k$  the observed allele frequencies and  $\mu_x^1, \mu_x^2, \dots, \mu_x^k$  the expected allele frequencies for a SNP of interest in each stratum (and analogously for  $y$ ).

We assume the  $Z$  score  $Z_{\{n_x\}, \{n_y\}}(\{m_x\}, \{m_y\})$  in this case is a smooth function of  $\{n_x^i\}, \{n_y^i\}, \{m_x^i\}, \{m_y^i\}$ , which has a first-order expansion about  $\mu^1, \mu^2, \dots, \mu^k$  of the form

$$Z_{\{n_x\}, \{n_y\}}(\{m_x\}, \{m_y\}) = \frac{1}{\sqrt{\sum_{i \in 1..k} k_i^2 \frac{n_x^i + n_y^i}{2n_x^i n_y^i} \mu^i (1 - \mu^i)}} \sum_{i \in 1..k} k_i (m_x^i - m_y^i) + O\left(\sum_{i \in 1..k} k_i (m_x^i - m_y^i)^2\right) \quad (2.9)$$

$$\approx \frac{\sum k_i (m_x^i - m_y^i)}{\sqrt{\text{var}(\sum k_i (m_x^i - m_y^i) | \mu_x^i = \mu_y^i)}} + O\left(\sum k_i (m_x^i - m_y^i)^2\right) \quad (2.10)$$

where coefficients  $k_i$  depend only on the values  $\{n_x\}, \{n_y\}$ . For example, if the Cochran-Mantel-Haenszel test is used,  $k_i = \frac{2n_x^i n_y^i}{n_x + n_y}$ .

Using analogous definitions to section 2.1.1, we now define

$$Z_d = Z_{\{n_1\}, \{n_2\}}(\{m_1\}, \{m_2\}) \quad (2.11)$$

$$Z_a = Z_{\{n_1+n_2\}, \{n_c\}}(\{m_{12}\}, \{m_c\}) \quad (2.12)$$

We term the coefficients of the allelic differences  $m_1^i - m_2^i, m_{12}^i - m_c^i$  in the decomposition of  $Z_d$  and  $Z_a$  above as  $k_{di}, k_{ai}$  respectively.

### 2.1.3 Adjustment for covariates

If the distribution some continuous confounder associated with allele frequency (for example, height) has a systematically different distribution in  $x$  and  $y$ , adjustment for covariates may be needed when computing GWAS p-values

We set  $G(i)$  as the numerical genotype of sample  $i$  (0,1, or 2) and  $w_i$  as the covariate value(s) for individual  $i$ . We consider  $w_i$  to be a sample from a random variable  $Z$  with *pdf*  $f_x$  in  $x$  and  $f_y$  in  $y$ .

We define the  $Z$  score  $Z_{x,y}(\{G\}, \{w\})$  in this case as a function of observed genotypes which permits a first-order expansion

$$Z_{x,y}(\{G\}, \{w\}) = \frac{1}{\sqrt{\bar{m}(1 - \bar{m})}} \left( \sum_{i \in x} h_x(w_i) G(i) - \sum_{j \in y} h_y(w_j) G(j) \right) \quad (2.13)$$

where  $h_x$  and  $h_y$  are functions of covariate scores, depending on the distribution of  $w$  in  $x$  and  $y$  and the relative sizes of  $n_x$  and  $n_y$ , and parameter  $\bar{m}$  is some measure of the overall allele frequency.

The coefficients  $h_x(w_i), h_y(w_i)$  can be considered to be ‘normalising’ the contribution of genotype  $i$  to the  $Z$  score according to the relative density of covariate  $w_i$  in  $x$  and  $y$ . If the density of some weight  $w_0$  in  $x$  is lower than the density in  $y$ , then  $h_x(w_0)$  should be greater than  $h_y(w_0)$  to compensate for this. Indeed, we show that this has to be the case.

The expected genotype of an individual may depend on their covariate value; for an individual  $i$  with covariate value(s)  $w_i$  in  $x$  set  $g_x(w_i) = E(G(i))$ , and set  $g_y$  similarly. Under the null hypothesis,  $g_x \equiv g_y$ , and the expectation of  $Z$  must be 0. We can write the expectation of  $Z_{x,y}(\{G\}, \{w\})$  as an integral over

the domain of  $w$ ; namely

$$\begin{aligned}
 E(\sqrt{\bar{m}(1-\bar{m})}Z_{x,y}(\{G\},\{w\})) &= E\left(\sum_{i\in x}h_x(w_i)G(i)-\sum_{j\in y}h_y(w_j)G(j)\right) \\
 &= \sum_{i\in x}h_x(w_i)E(G(i))-\sum_{j\in y}h_y(w_j)E(G(j)) \\
 &= \sum_{i\in x}h_x(w_i)g_x(w_i)-\sum_{j\in y}h_y(w_j)g_y(w_j) \\
 &\rightarrow n_x\int_{\mathbb{D}(w)}h_x(w)f_x(w)g_x(w)dw-n_y\int_{\mathbb{D}(w)}h_y(w)f_y(w)g_y(w)dw \\
 &= \int_{\mathbb{D}(w)}g_x(w)(n_xh_x(w)f_x(w)-n_yh_y(w)f_y(w))dw \tag{2.14}
 \end{aligned}$$

Since this must hold for all SNPs and thus for any well-behaved function  $g_x$ , we must have

$$n_xh_xf_x \equiv n_yh_yf_y \tag{2.15}$$

This arises intuitively if we consider adjustment for covariates analogously to adjusting for strata. We can rewrite equation 2.9 summing over samples rather than strata (defining  $S(i)$  as the stratum of individual  $i$ ):

$$Z_{\{n_1\},\{n_2\}}(\{m_x\},\{m_y\}) \propto \frac{1}{\sqrt{\bar{m}(1-\bar{m})}}\left(\sum_{i\in x}\frac{c_{S(i)}}{2n_x^i}G(i)-\sum_{j\in y}\frac{c_{S(j)}}{2n_y^j}G(j)\right)+O\left(\sum(m_x^i-m_y^i)^2\right) \tag{2.16}$$

The values  $\frac{c_{S(i)}}{2n_x^i}$ ,  $\frac{c_{S(j)}}{2n_y^j}$  can be considered to be ‘normalising’ the distribution of strata across  $x$  and  $y$  by multiply-counting certain individuals in under-represented strata and under-counting individuals in over-represented strata. This is analogous to ‘normalising’ the contribution of  $G(i)$  by  $h_x$  according to the population prevalence of covariate value  $z_i$ ; that is,  $f_x(z_i)$ .

The sums of genotypes on the right of equation 2.13 can be considered as ‘effective’ allele frequencies, and we define

$$\begin{aligned}
 m'_x &= \sum_{i\in x}h_x(z_i)G(i) \\
 m'_y &= \sum_{j\in y}h_y(z_j)G(j) \tag{2.17}
 \end{aligned}$$

with expected values  $\mu'_x$ ,  $\mu'_y$  respectively. We define ‘effective’ sample sizes  $n'_x = \frac{\mu'_x(1-\mu'_x)}{\text{var}(m'_x)}$ ,  $n'_y = \frac{\mu'_y(1-\mu'_y)}{\text{var}(m'_y)}$  so that, like allele frequencies, and under appropriate assumptions on the forms of  $f_x$ ,  $f_y$ ,  $g_x$ ,  $g_y$ :

$$\frac{m'_x - \mu'_x}{\sqrt{\frac{\mu'_x(1-\mu'_x)}{n'_x}}} \rightarrow_d N(0, 1) \tag{2.18}$$

and similarly for  $m'_y$ .

We now define

$$Z_d = Z_{\text{case 1, case 2}}(\{G\},\{w\}) \tag{2.19}$$

$$Z_a = Z_{\text{cases, controls}}(\{G\},\{w\}) \tag{2.20}$$

## 2.2 $Z_d$ and $Z_a$ are conditionally independent in categories 1 and 2

### 2.2.1 Unstratified or stratified groups

For SNPs in categories 1 and 2,  $\mu_1 = \mu_2$ . Hence

$$\begin{aligned}
 \text{cov}(Z_d, Z_a) &\propto \text{cov}(m_{12} - m_c, m_1 - m_2) \\
 &= \text{cov}\left(\frac{n_1 m_1 + n_2 m_2}{n_1 + n_2} - m_c, m_1 - m_2\right) \\
 &= \frac{1}{n_1 + n_2} (\text{cov}(n_1 m_1, m_1) - \text{cov}(n_2 m_2, m_2)) \\
 &= \frac{1}{n_1 + n_2} (\mu_1(1 - \mu_1) - \mu_2(1 - \mu_2))
 \end{aligned} \tag{2.21}$$

which is 0 under  $H_0$  in categories 1 and 2.

For stratified groups, the same holds for each stratum; that is,  $\text{cov}(m_{12}^i - m_c^i, m_1^i - m_2^i) = 0$ . The independence of  $Z_d$  and  $Z_a$  follows from the expression of  $Z_d$  and  $Z_a$  as proportional to sums of allelic differences within strata and independence of the allelic differences in each stratum.

### 2.2.2 Adjustment for covariates

If we are adjusting for covariates, since  $E(Z_d) = E\left(\sum_{i \in c1} h_1(w_i)G(i) - \sum_{j \in c2} h_2(w_j)G(j)\right) = 0$ , we have

$$\begin{aligned}
 \text{cov}(Z_d, Z_a | \mu'_1 = \mu'_2) &\propto \text{cov}\left(\sum_{j \in \text{cases}} h_{12}(w_j)G(j) - \sum_{i \in \text{ctl}} h_c(w_i)G(i), \sum_{i \in c1} h_1(w_i)G(i) - \sum_{j \in c2} h_2(w_j)G(j)\right) \\
 &= \text{cov}\left(\sum_{i \in c1} h_{12}(w_i)G(i) + \sum_{j \in c2} h_{12}(w_j)G(j), \sum_{i \in c1} h_1(w_i)G(i) - \sum_{j \in c2} h_2(w_j)G(j)\right) \\
 &= E\left(\sum_{i \in c1} h_{12}(z_i)h_1(w_i)G(i)(1 - G(i)) - \sum_{j \in c2} h_{12}(z_i)h_2(w_j)(G(j)(1 - G(j)))\right) \\
 &\rightarrow \int_{\mathbb{R}} h_{12}(w) (n_1 h_1(w) f_1(w) - n_2 h_2(w) f_2(w)) g_1(w) (1 - g_1(w)) dw \\
 &= 0
 \end{aligned} \tag{2.22}$$

The cancellations are possible because genotypes vary independently in each group; in the second line,  $\sum_{i \in \text{ctl}} h_c(w_i)G(i) \perp \sum_{i \in c1} h_1(w_i)G(i)$ ,  $\sum_{j \in c2} h_2(w_j)G(j)$ , and in the third line,  $\sum_{i \in c1} h_{12}(w_i)G(i) \perp \sum_{j \in c2} h_2(w_j)G(j)$  and  $\sum_{j \in c2} h_{12}(w_j)G(j) \perp \sum_{i \in c1} h_1(w_i)G(i)$ , and  $g_1 \equiv g_2$  under  $H_0$ . In the fourth line,  $n_1 h_1(w) f_1(w) \equiv n_2 h_2(w) f_2(w)$ .

## 2.3 SNPs in category 3

Under  $H_0$ , SNPs in category 3 have the same allele frequency in cases and controls but different population allele frequencies between subgroups. Such a set may arise if subgrouping is based on some partially genetically-determined trait which is independent of the main phenotype has the same prevalence in case and control groups. An example may be subgroups defined by heterogeneity in treatment response arising

only from individual pharmacokinetic variation. Under this assumption, the marginal variance of the joint distribution of  $Z_d, Z_a$  in the direction of  $Z_a$  is 1, and  $Z_d, Z_a$  are uncorrelated.

Under  $H_1$  we expect SNPs in category 3 to be associated both with case/control status and with subgroup status. We therefore expect the marginal variances of the joint distribution to be greater than 1 in both the  $Z_a$  and  $Z_d$  directions, and possible correlation/anticorrelation between  $Z_a$  and  $Z_d$ .

Define  $\zeta(\mu_x, \mu_y)$  as the population normalised log odds ratio between  $\mu_x$  and  $\mu_y$ :

$$\begin{aligned}\zeta(\mu_x, \mu_y) &= \sqrt{\bar{\mu}(1-\bar{\mu})} \log \left( \frac{\mu_x(1-\mu_y)}{\mu_x(1-\mu_y)} \right) \\ &= \frac{\mu_x - \mu_y}{\sqrt{\bar{\mu}(1-\bar{\mu})}} + O((\mu_x - \mu_y)^2)\end{aligned}\tag{2.23}$$

where  $\bar{\mu} = \frac{1}{2}(\mu_x + \mu_y)$ . For a set of SNPs of interest, we consider  $\mu_1, \mu_2, \mu_c$  to be distributed such that  $\zeta_d = \zeta(\mu_1, \mu_2)$  and  $\zeta_a = \zeta(\mu_{12}, \mu_c)$  can be considered to be random variables with joint *pdf*:

$$F_{\sigma_a^2, \sigma_d^2, \rho_0} = \frac{1}{2} \left( N \left( \begin{pmatrix} 0 \\ 0 \end{pmatrix}, \begin{pmatrix} \sigma_d^2 & \rho_0 \\ \rho_0 & \sigma_a^2 \end{pmatrix} \right) + N \left( \begin{pmatrix} 0 \\ 0 \end{pmatrix}, \begin{pmatrix} \sigma_d^2 & -\rho_0 \\ -\rho_0 & \sigma_a^2 \end{pmatrix} \right) \right)\tag{2.24}$$

with  $\sigma_d, \sigma_a$ , and  $\rho_0$  independent of  $n_1, n_2, n_c$ . Under  $H_0$ ,  $\sigma_a = 0$  (same MAFs in cases/controls) and  $\rho_0 = 0$ . We assume that  $\zeta_d$  and  $\zeta_a$  are conserved across strata and covariates.

### 2.3.1 Unstratified groups

Combining equation 2.2 with the first-order expansion of equation 2.23 about  $\bar{\mu}$ :

$$\begin{aligned}\zeta(\mu_x, \mu_y) &= \frac{\mu_x - \mu_y}{\sqrt{\bar{\mu}(1-\bar{\mu})}} + O((\mu_x - \mu_y)^2) \\ &\approx \sqrt{\frac{n_x + n_y}{2n_x n_y}} Z_{n_x, n_y}(\mu_x, \mu_y)\end{aligned}\tag{2.25}$$

so defining  $\bar{\mu}_d = \frac{1}{2}(\mu_1 + \mu_2)$  and  $\bar{\mu}_a = \frac{1}{2}(\mu_{12} + \mu_c)$ , we note (defining  $c_a$  and  $c_d$ ):

$$\begin{aligned}E(Z_d | \bar{\mu}_d, \zeta_d) &= E(Z_d | \mu_1, \mu_2) \\ &= Z_{n_1, n_2}(\mu_1, \mu_2) \\ &= \sqrt{\frac{2n_1 n_2}{n_1 + n_2}} \zeta_d \\ &\stackrel{\text{def}}{=} c_d \zeta_d \\ E(Z_a | \bar{\mu}_a, \zeta_a) &= \sqrt{\frac{2n_{12} n_c}{n_{12} + n_c}} \zeta_a \\ &\stackrel{\text{def}}{=} c_a \zeta_a\end{aligned}\tag{2.26}$$

Set  $\boldsymbol{\mu} = (\mu_1, \mu_2, \mu_c)$ . Since  $m_1, m_2$  and  $m_c$  are conditionally independent given  $\boldsymbol{\mu}$  we have

$$\begin{aligned}\text{cor}(Z_a, Z_d | \boldsymbol{\mu}) &= \text{cor}(m_{12} - m_c, m_1 - m_2 | \boldsymbol{\mu}) \\ &= \frac{\text{cov}(\frac{n_1 m_1 + n_2 m_2}{n_1 + n_2} - m_c, m_1 - m_2 | \boldsymbol{\mu})}{\sigma(m_s - m_c | \boldsymbol{\mu}) \sigma(m_1 - m_2 | \boldsymbol{\mu})} \\ &= \frac{\text{cov}(n_1 m_1, m_1 | \boldsymbol{\mu}) - \text{cov}(n_2 m_2, m_2 | \boldsymbol{\mu})}{(n_1 + n_2) \sigma(m_s - m_c | \boldsymbol{\mu}) \sigma(m_1 - m_2 | \boldsymbol{\mu})} \\ &= \frac{\mu_1(1-\mu_1) - \mu_2(1-\mu_2)}{(n_1 + n_2) \sigma(m_s - m_c | \boldsymbol{\mu}) \sigma(m_1 - m_2 | \boldsymbol{\mu})} \\ &\approx 0\end{aligned}$$

From equation 2.6,  $var(Z_d|\mu_1, \mu_2) = var(Z_a|\mu_1, \mu_2, \mu_c) = 1$ . Thus approximately:

$$\begin{pmatrix} Z_d \\ Z_a \end{pmatrix} | \zeta_d, \zeta_a \sim N \left( \begin{pmatrix} c_d \zeta_d \\ c_a \zeta_a \end{pmatrix}, I_2 \right) \tag{2.27}$$

and the *pdf* of  $(Z_a \ Z_d)^T$  at  $(x, y)$  has value

$$\begin{aligned} & \iint_{\mathbb{R}^2} N_{(c_d \zeta_d \ c_a \zeta_a)^T, I_2}(x, y) F_{\sigma_a^2, \sigma_d^2, \rho_0}(\zeta_d, \zeta_a) \ d\zeta_d \ d\zeta_a \\ &= F_{1+c_d^2 \sigma_a^2, 1+c_d^2 \sigma_d^2, c_a c_d \rho_0}(x, y) \\ &= \frac{1}{2} \left( N \left( \begin{pmatrix} 0 \\ 0 \end{pmatrix}, \begin{pmatrix} 1+c_d^2 \zeta_d^2 & c_a c_d \rho_0 \\ c_a c_d \rho_0 & 1+c_a^2 \zeta_a^2 \end{pmatrix} \right) (x, y) + N \left( \begin{pmatrix} 0 \\ 0 \end{pmatrix}, \begin{pmatrix} 1+c_d^2 \zeta_d^2 & -c_a c_d \rho_0 \\ -c_a c_d \rho_0 & 1+c_a^2 \zeta_a^2 \end{pmatrix} \right) (x, y) \right) \end{aligned} \tag{2.28}$$

which is a symmetric two-Gaussian distribution. Under  $H_0$ , the marginal variance in the direction of  $Z_a$  (fitted  $\sigma_3^2$ ) is 1, and the covariance between  $Z_d$  and  $Z_a$  is zero.

### 2.3.2 Adjustment for strata

For stratified groups, we assume  $\zeta_a$  and  $\zeta_d$  are conserved across strata, and set  $\bar{\mu}_d^i = \frac{1}{2}(\mu_1^i + \mu_2^i)$ ,  $\bar{\mu}_a^i = \frac{1}{2}(\mu_{12}^i + \mu_c^i)$ ,  $k_{di}$  as the coefficient of  $m_1^i - m_2^i$  in the first-order expansion of  $Z_d$  (equation 2.9), and  $k_{ai}$  as the coefficient of  $m_{12}^i - m_c^i$  in the first-order expansion of  $Z_a$  to find

$$\begin{aligned} E(Z_d|\{\bar{\mu}_d\}, \zeta_d) &= E(Z_d|\{\bar{\mu}_1\}, \{\bar{\mu}_2\}) \\ &\approx \frac{1}{\sqrt{\sum_{i \in 1..k} k_{di}^2 \frac{n_1^i + n_2^i}{2n_1^i n_2^i} \bar{\mu}_d^i (1 - \bar{\mu}_d^i)}} \sum_{i \in 1..k} k_{di} (\mu_1^i - \mu_2^i) \\ &\approx \frac{\sum k_{di} \sqrt{\bar{\mu}_d^i (1 - \bar{\mu}_d^i)}}{\sqrt{\sum k_{di}^2 \frac{n_1^i + n_2^i}{2n_1^i n_2^i} \bar{\mu}_d^i (1 - \bar{\mu}_d^i)}} \zeta_d \\ &\approx \frac{\sum k_{di}}{\sqrt{\sum k_{di}^2 \frac{n_1^i + n_2^i}{2n_1^i n_2^i}}} \zeta_d \\ &\stackrel{\text{def}}{=} c'_d \zeta_d \end{aligned} \tag{2.29}$$

and

$$\begin{aligned} E(Z_a|\{\bar{\mu}_a^1, \bar{\mu}_a^2, \dots, \bar{\mu}_a^k\}, \zeta_a) &\approx \frac{\sum k_{ai}}{\sqrt{\sum k_{ai}^2 \frac{n_{12}^i + n_c^i}{2n_{12}^i n_c^i}}} \zeta_a \\ &\stackrel{\text{def}}{=} c'_a \zeta_a \end{aligned} \tag{2.30}$$

assuming that for most SNPs the values  $\bar{\mu}_d^i$ ,  $\bar{\mu}_a^i$  do not differ markedly across strata. If the Cochran-Mantel-Haenszel test is used,

$$\begin{aligned} c'_d &= \sqrt{\sum k_{di}} \\ &= \sqrt{\sum \frac{2n_1^i n_2^i}{n_1^i + n_2^i}} \\ c'_a &= \sqrt{\sum \frac{2n_{12}^i n_c^i}{n_{12}^i + n_c^i}} \end{aligned} \tag{2.31}$$

and the *pdf* of  $Z_d, Z_a$  is then as for equation 2.28 with  $c'_d, c'_a$  in place of  $c_d, c_a$ .

### 2.3.3 Adjustment for covariates

The expression for  $Z_{x,y}(\{G\}, \{w\})$  can be rewritten as:

$$Z_{x,y}(\{G\}, \{w\}) = \frac{1}{\sqrt{\bar{m}(1-\bar{m})}}(m'_x - m'_y) \quad (2.32)$$

We define the analog of  $\zeta(\mu_x, \mu_y)$  given covariate(s)  $w$

$$\zeta(\mu_x, \mu_y)|w = \sqrt{\bar{\mu}(w)(1-\bar{\mu}(w))} \log \left( \frac{\mu'_x(w)(1-\mu_y(w))}{\mu_x(w)(1-\mu_y(w))} \right) \quad (2.33)$$

and assume that this is independent of  $w$ ; that is, the effect size is conserved with respect to the covariate. The joint distribution of  $Z_d$  and  $Z_a$  is then given by the analog of equation 2.28 with appropriate analogues of  $c_d, c_a$ .

## 2.4 Unequal subgroup prevalences

### 2.4.1 Motivation

The criteria by which subgroups are defined may have a different distribution in the population than in the case group, with the consequence that the disease subtype corresponding to one of the subgroups may be oversampled relative to its true prevalence in the population.

This leads to inaccuracies in the inferred genetic architecture recovered from a case-control study (ie, a typical GWAS), which may take the form of false-positive associations. If there exist variants which differentiate subgroups, oversampling of one subgroup will bias the the observed overall variant effect sizes toward the effect size in the oversampled subgroup, even if the variants are unassociated with the phenotype overall.

In serious cases, this could lead to false identification of variants associated only with subgroup status as associated with the disease as a whole. For example, a GWAS on rheumatoid arthritis (RA) in which the case group had a high prevalence of obesity may identify purely obesity-associated variants as RA-associated.

For stratified and covariate-adjusted analyses, the equivalent problem is failure of population subgroup prevalences to match study subgroup prevalences within each strata or across covariates. This could be a result of ascertainment bias; different geographic locations could report different frequencies of disease subtypes due to differences in clinic specialties.

As well as affecting conventional GWAS analyses, we show below that subgroup oversampling can cause false-positives in our test. We provide a modification to our method to account for this.

### 2.4.2 Behaviour of standard approach

We mathematically demonstrate the effect of mismatched sample and population subgroup frequencies in the scenario where no strata or covariates are used. The extension to the generalised cases is similar.

Assume that in the disease population, the ‘true’ prevalences of subgroups 1 and 2 are  $\nu, 1-\nu$ , and define  $\mu_{12} = \nu\mu_1 + (1-\nu)\mu_2$  as the underlying MAF across all cases in the population. In the hypothesis test to compute  $P_a$ , the hypothesis  $H_a : \mu_c = \frac{n_1\mu_1 + n_2\mu_2}{n_1 + n_2}$  is not equivalent to  $H : \mu_c = \mu_{12}$ .

Since  $E(m_{12}) = E\left(\frac{n_1\mu_1 + n_2\mu_2}{n_1 + n_2}\right) = \frac{n_1\mu_1 + n_2\mu_2}{n_1 + n_2} \neq \mu_{12}$ , equation 2.27 becomes

$$\begin{pmatrix} Z_d \\ Z_a \end{pmatrix} | \boldsymbol{\mu} \sim N \left( \begin{pmatrix} Z_{n_1, n_2}(\mu_1, \mu_2) \\ Z_{n_{12}, n_c}(\frac{n_1\mu_1 + n_2\mu_2}{n_1 + n_2}, \mu_c) \end{pmatrix}, I_2 \right) \quad (2.34)$$



Now

$$\begin{aligned}
 Z_{n_1, n_2, n_c} \left( \frac{n_1 \mu_1 + n_2 \mu_2}{n_1 + n_2}, \mu_c \right) &\approx \frac{c_a}{\sqrt{\bar{\mu}(1-\bar{\mu})}} \left( \frac{n_1 \mu_1 + n_2 \mu_2}{n_1 + n_2} - \mu_c \right) \\
 &= \frac{c_a}{\sqrt{\bar{\mu}(1-\bar{\mu})}} \left( (\mu_{12} - \mu_c) + \left( \frac{n_1}{n_1 + n_2} - \nu \right) (\mu_1 - \mu_2) \right) \\
 &\approx c_a (\zeta_a + k \zeta_d)
 \end{aligned} \tag{2.35}$$

where  $k = \left( \frac{n_1}{n_1 + n_2} - \nu \right)$ , so the unconditional distribution of  $(Z_a \ Z_d)^T$  in this case is given by

$$\begin{aligned}
 &\iint_{\mathbb{R}^2} N_{(c_d \zeta_d \ c_a (\zeta_a + c \zeta_d))^T, I_2}(x, y) F_{\sigma_a^2, \sigma_d^2, \rho_0}(\zeta_d, \zeta_a) \ d\zeta_d \ d\zeta_a \\
 &= \frac{1}{2} \left( N_{\left( \begin{smallmatrix} 0 \\ 0 \end{smallmatrix}, \sigma_2 \right)}(x, y) + N_{\left( \begin{smallmatrix} 0 \\ 0 \end{smallmatrix}, \sigma_3 \right)}(x, y) \right)
 \end{aligned} \tag{2.36}$$

where

$$\begin{aligned}
 \sigma_2 &= \begin{pmatrix} 1 + c_d^2 \zeta_d^2 & c_a c_d (\rho_0 + k \zeta_d^2) \\ c_a c_d (\rho_0 + k \zeta_d^2) & 1 + c_a^2 (\zeta_a^2 + k^2 \zeta_d^2 + 2k \rho_0) \end{pmatrix} \\
 \sigma_3 &= \begin{pmatrix} 1 + c_d^2 \zeta_d^2 & c_a c_d (-\rho_0 + k \zeta_d^2) \\ c_a c_d (-\rho_0 + k \zeta_d^2) & 1 + c_a^2 (\zeta_a^2 + k^2 \zeta_d^2 - 2k \rho_0) \end{pmatrix}
 \end{aligned} \tag{2.37}$$

Distribution 2.36 consists of the sum of two Gaussians which are not mirror images in the  $x$  and  $y$  axes. Conceptually, the aberrance between prevalences of subgroups in the population and in the study induces a bias in  $Z_a$  toward either  $Z_1$  or  $Z_2$ , whichever is comparatively over-represented in the study compared to the population.

This effect is demonstrated in figure 2.1, with simulated data and approximate distribution as per 2.36. As the discrepancy between the relative proportions grows, the distributions precess around the origin. Importantly, under  $H_0$  ( $\sigma_a = 0, \rho_0 = 0$ ) the distribution of  $Z_d, Z_a$  will not satisfy  $\sigma_3 = 1, \rho = 0$ , and our standard approach is inappropriate.

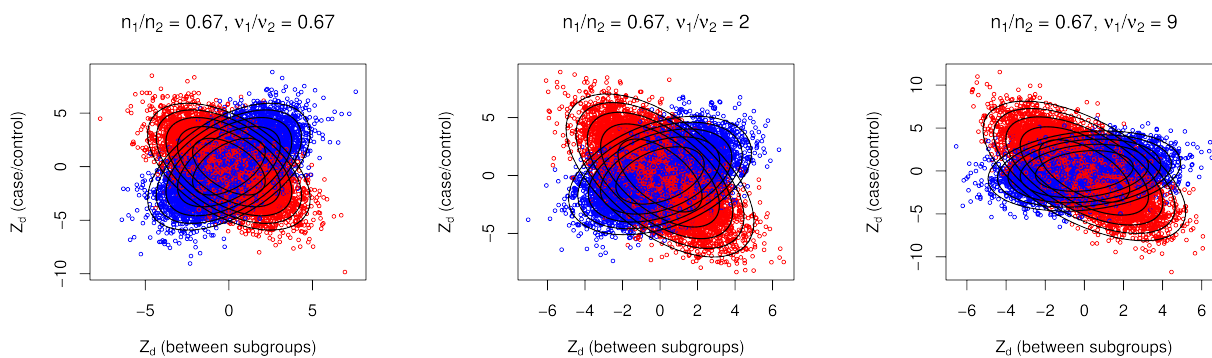

Figure 2.1: Distribution of  $(Z_a, Z_d)$  for SNPs in category 3 when observed subgroup frequency ( $n_1/n_2$ ) does not match underlying subgroup frequency in the population ( $\nu_1/\nu_2 = \nu/(1-\nu)$ ). Red and blue points correspond to the two Gaussian distributions comprising the underlying distribution of effect sizes. Contour lines of distributions are shown. Note the precession in the axes of the distributions as the difference between  $\nu_1/\nu_2$  and  $n_1/n_2$  increases, and loss of symmetry when  $\nu_1/\nu_2 \neq n_1/n_2$

### 2.4.3 Adaptation

If the true proportion of case subgroups in the population are known, the problem of oversampled subgroups can be overcome by a recalculation of  $Z_a$ . The problem broadly arises because the expected value of the observed allele frequency in cases,  $E(m_{12})$ , is different from the true allele frequency  $\mu_{12}$  in cases in the population, for SNPs in category 3.

This can be addressed by using an unbiased estimate of the true population allele frequency  $m'_{12} = \nu m_1 + (1 - \nu)m_2$  in place of  $m_{12}$ . The resultant  $Z$  score,  $Z'_a$ , is obtained by adjusting  $Z_a$  by subtracting a multiple of  $Z_d$ :

$$Z'_a = \frac{1}{\sqrt{1 + \beta^2}} (Z_a - \beta Z_d) \quad (2.38)$$

so, given a between-subgroup effect size  $\zeta_d$ ,  $\text{var}(Z'_a|\zeta_d) = 1$ . We choose  $\beta$  so that  $E(Z'_a) = 0$  for SNPs in category 3 (see below). The adjustment leads to systematic covariance between  $Z_d$  and  $Z'_a$ .

$Z_a$  and  $Z_d$  are independent conditioned on  $\zeta_a$ ,  $\zeta_d$  and  $\bar{\mu}$ . Thus under  $H_0$  and conditioning on  $\bar{\mu}$

$$\begin{aligned} \text{cov}(Z'_a, Z_d|\zeta_a, \zeta_d) &= \frac{1}{\sqrt{1 + \beta^2}} E(Z_d(Z_a - \beta Z_d)|\zeta_a, \zeta_d) \\ &= \frac{1}{\sqrt{1 + \beta^2}} (E(Z_d Z_a|\zeta_a, \zeta_d) - \beta E(Z_d^2|\zeta_a, \zeta_d)) \\ &= \frac{-\beta}{\sqrt{1 + \beta^2}} \text{var}(Z_d^2|\zeta_d) \\ &= \frac{-\beta}{\sqrt{1 + \beta^2}} \end{aligned} \quad (2.39)$$

and because  $\zeta_d$  and  $\zeta_a$  are independent under  $H_0$ ,  $\text{cov}(Z'_a, Z_d) = \frac{-\beta}{\sqrt{1 + \beta^2}}$  in every category. We denote this consistent covariance by  $\rho_c$

Hence the overall model for  $Z_d, Z_a$  changes to

$$\begin{aligned} PDF_{Z_d, Z_a|\Theta}(d, a) &= \pi_1 N \begin{pmatrix} 1 & \rho_c \\ \rho_c & 1 \end{pmatrix} (d, a) && \text{(category 1)} \\ &+ \pi_2 N \begin{pmatrix} 1 & \rho_c \\ \rho_c & \sigma_2^2 \end{pmatrix} (d, a) && \text{(category 2)} \\ &+ \pi_3 \left( \frac{1}{2} N \begin{pmatrix} \tau^2 & \rho + \rho_c \\ \rho + \rho_c & \sigma_3^2 \end{pmatrix} (d, a) + \frac{1}{2} N \begin{pmatrix} \tau^2 & -\rho + \rho_c \\ -\rho + \rho_c & \sigma_3^2 \end{pmatrix} (d, a) \right) && \text{(category 3)} \end{aligned} \quad (2.40)$$

where, under  $H_0$ ,  $\rho = 0$  and  $\sigma_3 = 1$ . This requires a slight modification of the fitting algorithm. Our R package at <https://github.com/jamesliley/subtest> contains an implementation.

### 2.4.4 No adjustment - unbiased sampling

If no strata nor covariates are used, we set

$$\begin{aligned} \beta &= \left( \frac{n_1}{n_1 + n_2} - \nu \right) \frac{c_a}{c_d} \\ &\stackrel{\text{def}}{=} k \frac{c_a}{c_d} \end{aligned} \quad (2.41)$$

recalling the definitions of  $c_a$  and  $c_d$  from equation 2.26, and that  $\nu$  is the proportion of cases of subgroup 1 in the population while  $\frac{n_1}{n_1 + n_2}$  is the proportion in the study. The value  $k = \left( \frac{n_1}{n_1 + n_2} - \nu \right)$  thus corresponds to the dissimilarity between subgroup prevalences in the case group and in the population.

Under  $H_0$ , for SNPs in category 3 we have

$$\begin{aligned}
 E(Z'_a|\zeta_d) &\propto E\left(Z_a - k\frac{c_a}{c_d}Z_d\right) \\
 &= \frac{c_a}{\sqrt{\bar{m}(1-\bar{m})}}E\left(\left(\frac{n_1m_1 + n_2m_2}{n_1 + n_2} - m_c\right) - \left(\frac{n_1}{n_1 + n_2} - \nu\right)(m_1 - m_2)\right) \\
 &= \frac{c_a}{\sqrt{\bar{m}(1-\bar{m})}}E(\nu m_1 + (1-\nu)m_2 - m_c) \\
 &= 0
 \end{aligned}
 \tag{2.42}$$

since  $E(\nu m_1 + (1-\nu)m_2) = \nu\mu_1 + (1-\nu)\mu_2 = \mu_c = E(m_c)$  for all SNPs under  $H_0$ .

### 2.4.5 Adjustment for strata

In the equivalent adjustment for stratified groups, we define

$$\beta = \frac{\sqrt{\sum k_{di}^2 \frac{n_1^i + n_2^i}{2n_1^i n_2^i}} \sum k_{ai} \left(\frac{n_1^i}{n_1^i + n_2^i} - \nu\right)}{\sqrt{\sum k_{ai}^2 \frac{n_{12}^i + n_c^i}{2n_{12}^i n_c^i}} \sum k_{di}}
 \tag{2.43}$$

so, assuming  $\mu_1^i - \mu_2^i$  are conserved and  $\bar{\mu}_a^i, \bar{\mu}_d^i$  are close to conserved across strata, and given  $\bar{\mu}_a^i \approx \bar{\mu}_d^i|H_0$ :

$$\begin{aligned}
 E(Z'_a|H_0) &= \frac{\sum k_{ai}(\mu_{12}^i - \mu_c^i)}{\sqrt{\sum k_{ai}^2 \frac{n_{12}^i + n_c^i}{2n_{12}^i n_c^i}} \bar{\mu}_a^i (1 - \bar{\mu}_a^i)} + \beta \frac{\sum k_{di}(\mu_1^i - \mu_2^i)}{\sqrt{\sum k_{di}^2 \frac{n_1^i + n_2^i}{2n_1^i n_2^i}} \bar{\mu}_d^i (1 - \bar{\mu}_d^i)} \\
 &\approx \frac{\sum k_{ai}(\mu_{12}^i - \mu_c^i)}{\sqrt{\bar{\mu}_a(1-\bar{\mu}_a)} \sqrt{\sum k_{ai}^2 \frac{n_{12}^i + n_c^i}{2n_{12}^i n_c^i}}} + \beta \frac{\sum k_{di}(\mu_1^i - \mu_2^i)}{\sqrt{\bar{\mu}_d(1-\bar{\mu}_d)} \sqrt{\sum k_{di}^2 \frac{n_1^i + n_2^i}{2n_1^i n_2^i}}} \\
 &= \frac{1}{\sqrt{\bar{\mu}_a(1-\bar{\mu}_a)} \sqrt{\sum k_{ai}^2 \frac{n_{12}^i + n_c^i}{2n_{12}^i n_c^i}}} \left( \sum k_{ai} \left(\frac{n_1^i \mu_1^i + n_2^i \mu_2^i}{n_1^i + n_2^i} - \mu_c^i\right) - \left(\frac{n_1^i}{n_1^i + n_2^i} - \nu\right) (\mu_1^i - \mu_2^i) \right) \\
 &= \frac{1}{\sqrt{\bar{\mu}_a(1-\bar{\mu}_a)} \sqrt{\sum k_{ai}^2 \frac{n_{12}^i + n_c^i}{2n_{12}^i n_c^i}}} \left( \sum k_{ai} ((\nu\mu_1^i + (1-\nu)\mu_2^i) - \mu_c^i) \right) \\
 &= 0
 \end{aligned}
 \tag{2.44}$$

### 2.4.6 Adjustment for covariates

If covariates are used, we define the functions  $h_{12}, h_1, f_1, f_2$  as per section 2.1.3 and set

$$\beta = \frac{\int_{\mathbb{D}(w)} h_{12}(w) (n_1(1-\nu)f_1(w) - n_2\nu f_2(w)) dw}{\int_{\mathbb{D}(w)} n_1 h_1(w) f_1(w) dw}
 \tag{2.45}$$

so

$$\begin{aligned}
E(Z'_a) &\propto \sqrt{\bar{\mu}(1-\bar{\mu})}E(Z_a - \beta Z_d) \\
&= \left( \sum_{i \in c1} h_{12}(w_i)G(i) + \sum_{i \in c2} h_{12}(w_i)G(i) - \sum_{i \in controls} h_c(w_i)G(i) \right) \\
&\quad - \beta \left( \sum_{i \in c1} h_1(w_i)G(i) - \sum_{i \in c2} h_2(w_i)G(i) \right) \\
&\rightarrow \int_{\mathbb{D}(w)} h_{12}(w) (n_1 f_1(w)g_1(w) + n_2 f_2(w)g_2(w)) - n_c h_c(w)f_c(w)g_c(w) dw \\
&\quad - \beta (g_1(w) - g_2(w)) \int_{\mathbb{D}(w)} n_1 h_1(w)f_1(w) dw \\
&= \int_{\mathbb{D}(w)} h_{12}(w) (n_1 f_1(w) + n_2 f_2(w)) (\nu g_1(w) + (1-\nu)g_2(w)) - n_c h_c(w)f_c(w)g_c(w) dw \\
&= \int_{\mathbb{D}(w)} n_{12} h_{12}(w) f_{12}(w) (\nu g_1(w) + (1-\nu)g_2(w) - g_c(w)) dw \\
&= 0
\end{aligned} \tag{2.46}$$

since  $n_{12}h_{12}f_{12} \equiv n_c h_c f_c$  and  $n_1 h_1 f_1 \equiv n_2 h_2 f_2$  from section 2.1.3,  $g_1 - g_2$  is constant by assumption, and the expected population genotypes at covariate value  $w$  are the same in cases  $(\nu g_1(w) + (1-\nu)g_2(w))$  and controls  $(g_c(w))$  under  $H_0$ .

## 2.5 Testing procedure

### 2.5.1 Algorithm

For testing a subgrouping  $S$  of interest, we use the following protocol:

1. Compute  $Z_a$  scores between cases and controls
2. For the proposed subgrouping  $S$ 
  - (a) Compute scores  $Z_d^S$  corresponding to  $S$ ,
  - (b) Fit parameters of full and null models  $\Theta_1^S = \arg \max_{\Theta \in H_1} L(Z_d^S, Z_a | \Theta)$ ,  $\Theta_0^S = \arg \max_{\Theta \in H_0} L(Z_d^S, Z_a | \Theta)$
  - (c) Compute  $uPLR = \log\{L(Z_d^S, Z_a | \Theta_1^S)\} - \log\{L(Z_d^S, Z_a | \Theta_0^S)\}$  and adjusting factor  $f(Z_a | \Theta_1^S, \Theta_0^S) = \log\{L(Z_a | \Theta_1^S)\} - \log\{L(Z_a | \Theta_0^S)\}$
  - (d) Compute  $PLR_S = uPLR - f(Z_a | \Theta_1^S, \Theta_0^S)$
3. For  $> 1000$  random subgroups  $R$  of the case group
  - (a) Compute scores  $Z_d^*$  corresponding to  $R$
  - (b) Fit parameters  $\Theta_1^* = \arg \max_{\Theta \in H_1} L(Z_d^R | Z_a, \Theta)$ ,  $\Theta_0^* = \arg \max_{\Theta \in H_0} L(Z_d^R | Z_a, \Theta)$
  - (c) Compute  $cPLR = \log\{L(Z_d^* | Z_a, \Theta_1^*)\} - \log\{L(Z_d^* | Z_a, \Theta_0^*)\}$
4. Estimate parameters  $\gamma, \kappa$  of the null distribution of  $cPLR$  (of the form  $\gamma(\kappa\chi_1^2 + (1-\kappa)\chi_2^2)$ ), which majorises the null distribution of  $PLR$ .
5. Compute p-value for  $PLR_S$  using this distribution.

In summary, we compare an adjusted pseudo-log likelihood ratio for a subgrouping of interest to conditional pseudo-log likelihood ratios for randomly-chosen subgroupings.

### 2.5.2 Rationale

A problem arises with the behaviour of the unadjusted pseudo-log likelihood ratio statistic  $uPLR = \log\{L(Z_d^S, Z_a|\Theta_1^S)\} - \log\{L(Z_d^S, Z_a|\Theta_0^S)\}$  when the true value of  $\tau$  (the marginal variance of  $Z_d$  in group 3) is near 1, corresponding to an absence of SNPs which differentiate subgroups.

If  $\tau = 1$ , there can be no differential genetic architecture between the subgroups, as there are no systematic genetic differences between them at all. However, the joint distribution of  $Z_d, Z_a$  may still be in  $H_1$ ; if  $Z_a$  has an equally weighted three-Gaussian mixture distribution with variances 1,  $a^2, b^2$ , and  $Z_d \sim N(0, 1)$ , the true parameter values are  $(\pi_2, \pi_3, \tau, \sigma_2, \sigma_3, \rho) = (\frac{1}{3}, \frac{1}{3}, 1, a, b, 0) \in H_1 \setminus H_0$  (figure 2.2).

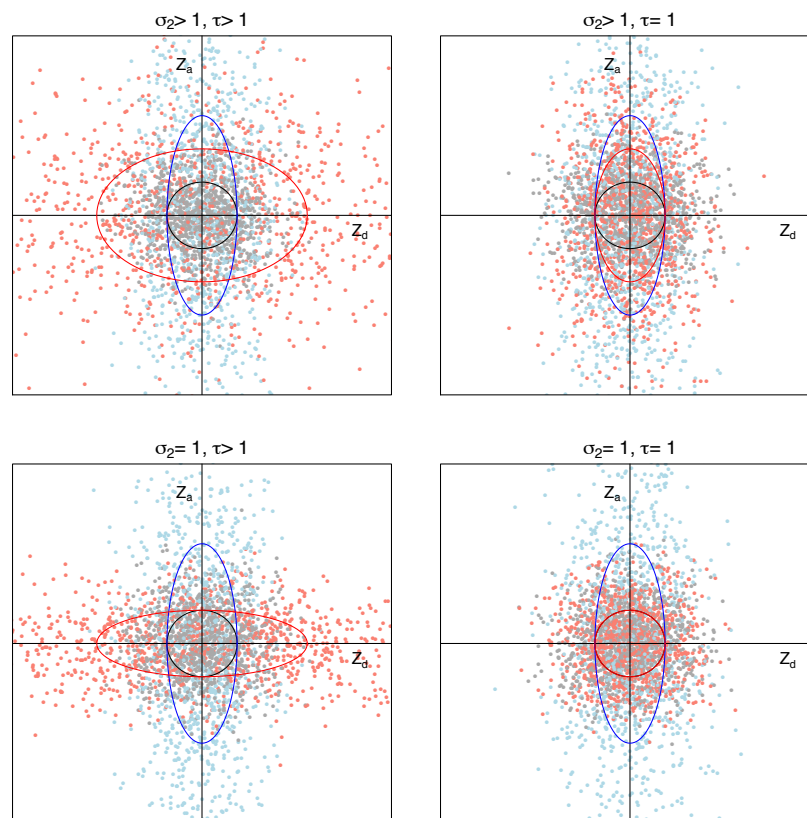

Figure 2.2: Potential for false positives when  $\tau = 1$ . Black/grey points and contours correspond to category 1, blue to category 2, and red/pink to category 3. Top two figures show potential distributions of  $Z_d, Z_a$  with  $\sigma_3 > 1$ ; bottom two figures show distributions with  $\sigma_3 = 1$ . A test based on the unadjusted pseudo-log likelihood ratio  $uPLR = \log\{L(Z_d^S, Z_a|\Theta_1^S)\} - \log\{L(Z_d^S, Z_a|\Theta_0^S)\}$  will reject  $H_0$  for both of the top two scenarios. However, we do not want to reject  $H_0$  for the top right figure, in which  $\tau = 1$  (no genetic difference between subgroups). This scenario is possible in real data, as the distribution of  $Z_a$  is only approximately normal and may more closely resemble a three-gaussian mixture distribution (where components have variances  $\sigma_2^2, \sigma_3^2$  and 1) than a two-Gaussian mixture distribution (where components have variances  $\sigma_1^2$  and 1).

This problem is particularly prevalent in randomly-chosen subgroups, since  $\tau = 1$  by assumption in this case. If the distribution of  $Z_d, Z_a$  from a test subgrouping is to be compared against corresponding distributions from random subgroupings, this problem must be addressed.

Consider the function

$$\begin{aligned} K(\mathbf{Z}, \Theta) &= K(Z_d, Z_a, \pi_1, \pi_2, \tau, \sigma_2, \sigma_3, \rho) \\ &= PL(\mathbf{Z}|\Theta) - E\{PL(\mathbf{Z}|\Theta \setminus \tau, \tau = 1)\} \\ &= PL(Z_d, Z_a|\Theta) - PL(Z_a|\Theta) + c(Z_a) \end{aligned} \quad (2.47)$$

where  $c(Z_a)$  is a constant depending only on the values of  $Z_a$ . Because the parameters  $\pi_2, \sigma_2$  only describe the distribution of  $Z_a$ , we have

$$\begin{aligned} \frac{\partial}{\partial \pi_2} PL(Z_d, Z_a|\Theta) &\approx \frac{\partial}{\partial \pi_2} PL(Z_a|\Theta) \\ \frac{\partial}{\partial \sigma_2} PL(Z_d, Z_a|\Theta) &\approx \frac{\partial}{\partial \sigma_2} PL(Z_a|\Theta) \end{aligned} \quad (2.48)$$

so  $\frac{\partial K}{\partial \pi_2} \approx 0$  and  $\frac{\partial K}{\partial \sigma_2} \approx 0$ , and the value of  $K$  changes only slightly with changes in  $\pi_2, \sigma_2$ . Set

$$\begin{aligned} \Theta_1 &= \arg \max_{\Theta \in H_1} PL(\mathbf{Z}|\Theta) \\ \Theta_1^* &= \arg \max_{\Theta \in H_1 | \pi_2 = \hat{\pi}_2, \sigma_2 = \hat{\sigma}_2} PL(\mathbf{Z}|\Theta) \end{aligned} \quad (2.49)$$

Under  $H_0$ , there is no systematic overlap between SNPs associated with the main phenotype (for which the distribution of effect sizes is parametrised by  $\pi_2, \sigma_2$ ) and with the subgrouping phenotype, so fixing  $\pi_2$  and  $\sigma_2$  has minimal effect on the maximum-PL estimates of the other parameters, and hence  $K(\mathbf{Z}, \Theta_1) \approx K(\mathbf{Z}, \Theta_1^*)$ . Because

$$K(\mathbf{Z}, \Theta_1^*) \leq \max_{\Theta \in H_1 | \pi_2 = \hat{\pi}_2, \sigma_2 = \hat{\sigma}_2} K(\mathbf{Z}, \Theta) \quad (2.50)$$

we have, setting  $\Theta_1^c = \arg \max_{\Theta \in H_1 | \pi_2 = \hat{\pi}_2, \sigma_2 = \hat{\sigma}_2} K(\mathbf{Z}, \Theta)$ :

$$K(\mathbf{Z}, \Theta_1) \leq K(\mathbf{Z}, \Theta_1^c) \quad (2.51)$$

Consider the value

$$\Theta_0^c = \arg \max_{\Theta \in H_1 | \pi_2 = \hat{\pi}_2, \sigma_2 = \hat{\sigma}_2} K(\mathbf{Z}, \Theta) \quad (2.52)$$

$$= \arg \max_{\dots} \{PL(Z_d, Z_a|\Theta) - PL(Z_a|\Theta)\} \quad (2.53)$$

Now since  $\sigma_3$  is fixed at 1 under  $H_0$ , and  $PL(Z_a|\Theta)$  only depends on  $\pi_1, \pi_3$  through the difference between the variances of their associated distribution components (1 and  $\sigma_3$  respectively), we have

$$PL(Z_a|\Theta) = PL(Z_a|\hat{\pi}_2, \hat{\sigma}_2) \quad (2.54)$$

Thus maximising  $K$  in equation 2.52 is analogous to maximising  $PL(Z_d, Z_a|\Theta)$ . If we choose  $\hat{\pi}_1$  and  $\hat{\sigma}_2$  to be approximately equal to their maximum-PL estimates under  $H_0$ , then

$$\begin{aligned} \Theta_0^* &= \arg \max_{\Theta \in H_0 | \pi_2 = \hat{\pi}_2, \sigma_2 = \hat{\sigma}_2} PL(\mathbf{Z}|\Theta) \\ &\approx \arg \max_{\Theta \in H_0} PL(\mathbf{Z}|\Theta) \\ &= \Theta_1 \end{aligned} \quad (2.55)$$

so  $K(\Theta_1) \approx K(\Theta_1^c)$ . Thus, under  $H_0$ , using equation 2.51

$$\begin{aligned} cPLR &= K(\mathbf{Z}, \Theta_1^c) - K(\mathbf{Z}, \Theta_0^c) \\ &\geq K(\mathbf{Z}, \Theta_1) - K(\mathbf{Z}, \Theta_0) \\ &= PLR \end{aligned} \quad (2.56)$$

Under  $H_0$ , with  $\tau > 1$ , the unadjusted PLR (equal to  $PL(\mathbf{Z}|\Theta_1) - PL(\mathbf{Z}|\Theta_2)$ ) and cPLR both have identical mixture- $\chi^2$  distributions (the scaling factor  $\gamma$  arises from LDAK weights, common to both, and the mixing parameter  $\kappa$  tends to be approximately 1/2). The cPLR has the advantage that the empirical distribution is closely approximated by a consistent mixture- $\chi^2$  distribution for all values of  $\tau$ . By comparing PLR to this distribution, we produce a conservative test.

Heuristically, contributions to the unadjusted *PLR* can come from either the distribution of  $Z_a$  or the interaction between  $Z_a$  and  $Z_d$ , and inflation in the unadjusted *PLR* when  $\tau = 1$  arise only from the former. If the former effect is large, the parameters  $\Theta_1$  will tend to be values which maximise the former effect, at the expense of the latter. By completely eliminating the former effect, using the adjustment, only this compromised contribution of the latter is allowed to contribute to the adjusted *PLR*. The distribution is less conservative for larger values of  $\tau$ , since the presence of SNPs with large  $Z_a$  values constricts the fitted distribution of  $Z_a$ . By contrast, the values which maximise the *cPLR* effectively take into account the adjustment for  $Z_a$ , and the compromise of the latter effect does not occur.

If we were to use the adjusted *uPLR* to generate the null distribution using random subgroups, the majorisation of the observed distribution by the mixture- $\chi^2$  may lead to loss of FDR control in test subgroups with  $\tau > 1$ . However, using the slightly anti-conservative distribution of *cPLR* to fit the null distribution overcomes this problem. Indeed, some conservatism is desirable when  $\tau = 1$  as a double guard against rejecting  $H_0$ . The power of *cPLR* to reject  $H_0$  is, however, somewhat lower than the power of the *PLR*, so we test using adjusted *uPLR* and fit the null distribution with *cPLR*.





# Note 3

## Details of simulations

### 3.1 Simulations of random genotypes

Firstly, we simulated genotypes at independent SNPs to establish the distributions of *PLR* and *cPLR* under  $H_0$  with  $\tau = 1$  and  $\tau > 1$ .

We simulated the following scenarios:

1. (a)  $(Z_d, Z_a)$  under  $H_0$  with  $\tau = 1$   
(b)  $(Z_d, Z_a)$  under  $H_0$  with  $\tau$  allowed to vary
2.  $(Z_d, Z_a)$  under  $H_1$

In each case,  $Z_a$  and  $Z_d$  were calculated from simulated genotypes at  $5 \times 10^4$  independent autosomal SNPs in Hardy-Weinberg equilibrium. Because the sample size only affects PLR through the size of the fitted parameters (supplementary material, section 3.3) we fixed the sample size at 2000 controls and 1000 cases of each subgroup and varied the underlying effect size distribution. Larger sample sizes correspond to larger deviations of underlying values of  $\sigma_2$ ,  $\sigma_3$ ,  $\tau$  from 1 (table 3.1).

For all simulations, we computed the uPLR and PLR (with adjustment  $f(Z_a)$ ). For scenario 1a ( $\tau = 1$ , corresponding to random subgroups) we additionally computed the cPLR. Simulations 2 functioned as power calculations; the results from these are shown in the main text.

We tested over values of  $\pi_3$  from  $\{10^{-3}, 10^{-2}, 0.1, 0.2\}$ . Values of  $\sigma_2$ ,  $\sigma_3$ ,  $\tau$  were chosen corresponding to 97.5% quantiles of odds ratios in  $\{1.5, 2, 2.5\}$  for case/control comparison ( $Z_a$ ) or  $\{1, 1.2, 1.5, 2\}$  for between-subgroups comparison ( $Z_d$ ), table 3.1. Values of  $\rho$  were chosen corresponding to correlations in  $\{0, 0.1, 0.5\}$ .

| $n_1, n_2$ | 97.5% quantile of odds ratios |      |      |      |
|------------|-------------------------------|------|------|------|
|            | 1.2                           | 1.5  | 2    | 2.5  |
| 500, 500   | 1.20                          | 1.75 | 2.66 | 3.41 |
| 1000, 500  | 1.25                          | 1.94 | 3.02 | 3.89 |
| 1000, 1000 | 1.36                          | 2.27 | 3.62 | 4.71 |

Table 3.1: Approximate expected standard deviations of observed  $Z$  scores for given odds-ratio distributions at various study sizes. For instance, if a study had 500 cases of each subgroup, and 95% of 'true' odds ratios (corresponding to population MAFs) for SNPs in category 3 were less than 1.5, the expected value of  $\tau$  (the standard deviation of  $Z$  scores for SNPs in category 3) would be 2.66.

We compared the observed distributions of PLR from simulations 1a,1b with the observed distribution of cPLR from simulation 1a. Q-Q plots are shown in figure 3.1. The distribution of cPLR agrees well

with a mixture- $\chi^2$  distribution, as does the distribution of PLR for simulation 1b. The distributions of PLR for simulations 1a,1b are minorised by the distribution of cPLR, more so for simulations 1a ( $\tau = 1$ ), leading to a conservative test overall. Using cPLR to fit a null distribution, and using a significance cutoff  $p < 0.05$ , leads to a false-discovery rate of 0.048 (95% CI 0.039-0.059) in subgroups with  $\tau > 1$  and 0.033 (95% CI 0.022-0.045) in subgroups with  $\tau = 1$ .

We also show the distribution of unadjusted PLR (uPLR) for simulations 1a and 1b. The distribution for 1a markedly majorises the mixture- $\chi^2$  distribution, and has a very different distribution to that for 1b. Thus, if a test subgroup with  $\tau \gg 1$  was compared to random subgroups using unadjusted PLR, the test would have very low power to reject  $H_0$ . Finally, we plotted the estimated null distribution for all tests of real disease datasets, and found that the empirical distributions of cPLR from random subgroups agreed well with the proposed mixture  $\chi^2$  distribution (Supplementary Figures 4a, 4b, 4c).

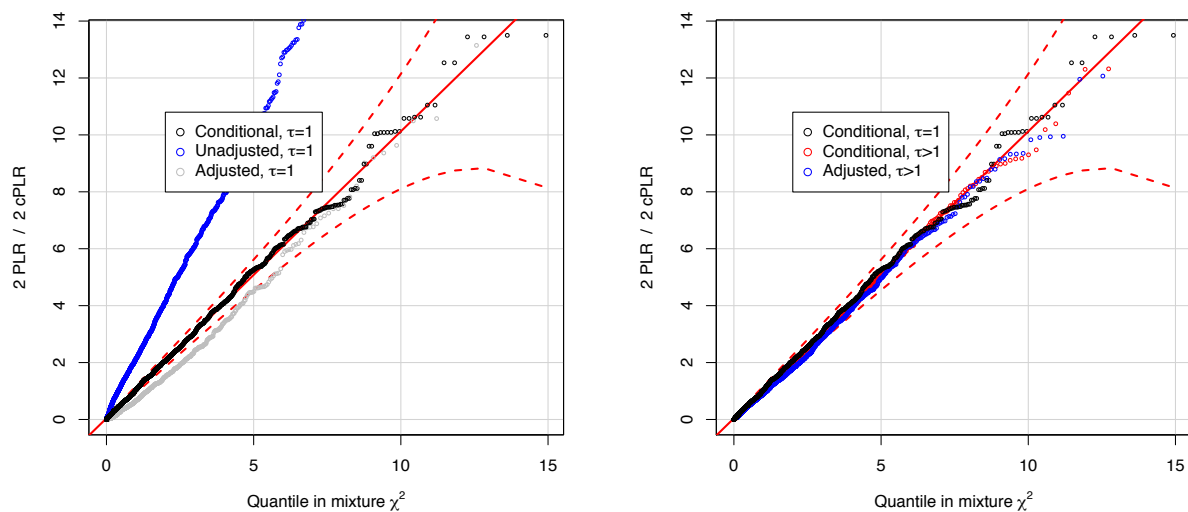

Figure 3.1: Q-Q plots comparing distributions of  $PLR$  and  $cPLR$  for subgroups based on simulated genotypes with a random variable distributed as  $\frac{1}{2}(\chi_1^2 + \chi_2^2)$  (that is,  $\gamma = \kappa = \frac{1}{2}$ ). In both plots, the black points correspond to conditional PLR (cPLR) values for 'random' subgroups ( $\tau = 1$ ). The observed distribution is well-approximated by the asymptotic mixture- $\chi^2$ . The left-hand plot shows the distributions of unadjusted and adjusted PLR for subgroups with  $\tau = 1$ . The distribution of unadjusted PLR markedly majorises the mixture- $\chi^2$ , but the adjustment largely fixes this. The right-hand plot compares the distribution of cPLR for random subgroups with PLR for subgroups with  $\tau > 1$ . The distribution of cPLR is well-approximated by the mixture- $\chi^2$  whether  $\tau = 1$  (black) or  $\tau > 1$  (red). In both plots, the distribution of cPLR and the mixture- $\chi^2$  distribution slightly majorise the distribution of PLR, leading to a conservative test.

### 3.2 Simulation on GWAS case group subgroups

To check the extensibility of these results to real data, we performed a similar set of simulations on data generated from subgroups of an ATD case group. In order to simulate scenarios in which  $\tau > 1$ , we selected subgroups for which groups of  $\approx 50$  SNPs differentiated subgroups without being associated with the disease in general.

Specifically, we repeatedly polled the overall dataset for sets of 2000 SNPs in linkage equilibrium,

then clustered them hierarchically using a Euclidean distance metric. We then chose the first-appearing cluster of 50 SNPs, and hierarchically clustered the individuals in the case group according to a metric based on similarity across the 50 SNPs. When there were two clusters of individuals left, we denoted the two clusters as subgroup 1 and subgroup 2. The mean resultant fitted value of  $\tau$  was  $\approx 5$  and standard deviation of fitted values was  $\approx 1.5$ .

For simulated subgroups with  $\tau = 1$  (randomly chosen) and with  $\tau > 1$  we computed *PLR* and *cPLR*. As for simulated genotypes, the resultant distributions showed good agreement with the proposed mixture- $\chi^2$  distributions (figure 3.2), with the approximation of the null distribution of *PLR* with the distribution of *cPLR* again leading to a conservative test, as expected. The type 1 error rate corresponding to  $\alpha = 0.05$  was 0.52 (95% CI 0.043-0.061) in subgroups with  $\tau > 1$  and 0.012 (95% CI 0.007-0.016) in subgroups with  $\tau = 1$ .

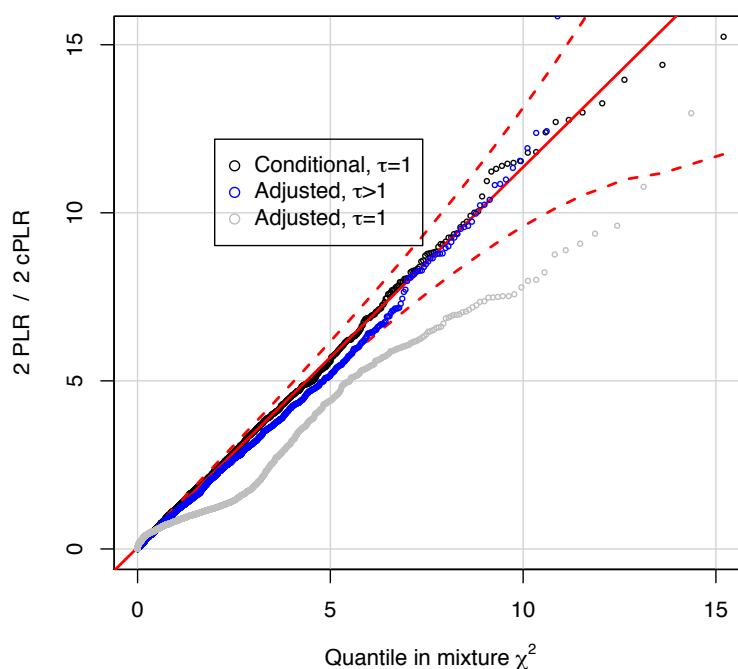

Figure 3.2: Comparison of distributions of *PLR* and *cPLR* for subgroups of an ATD case group, chosen so  $\tau = 1$  or  $\tau > 1$ . The distribution of *cPLR* for random subgroups ( $\tau = 1$ ) and the distribution of *PLR* for subgroups with  $\tau \gg 1$  are both well-approximated by a random variable distributed as  $\frac{1}{2}(\chi_1^2 + \chi_2^2)$ ; red dashed lines show 99% pointwise confidence intervals. The distribution of *PLR* when  $\tau = 1$  is minorised by the mixture- $\chi^2$  leading to a conservative test if a subgroup with  $\tau = 1$  is tested using *PLR* against the observed distribution of *cPLR* for random subgroups. Because  $\tau = 1$  implies no genetic difference between subgroups, this is reasonable behaviour for the test.

### 3.3 Distributions of parameter values for simulation and power calculations

We assume a distribution of summary statistics parametrised by six variables:  $\pi_1$ ,  $\pi_2$ ,  $\sigma_2$ ,  $\sigma_3$ ,  $\tau$ , and  $\rho$  (the value of  $\pi_3$  is determined by  $\pi_1$  and  $\pi_2$ ). The space of all parameter values is too large to meaningfully

assess performance of our test across it, so for each simulation, we draw the value of underlying parameters from sets of potential values chosen to reflect values which may arise in real data.

For a SNP  $S$  in two groups of size  $n_1$ ,  $n_2$ , denote the population allele frequencies as  $\mu_1$ ,  $\mu_2$  and the corresponding observed allele frequencies as  $m_1$ ,  $m_2$ . Set  $\mu = \frac{\mu_1 n_1 + \mu_2 n_2}{n_1 + n_2}$  as the overall observed MAF,  $r = \log\left(\frac{\mu_1(1-\mu_2)}{\mu_2(1-\mu_1)}\right)$  and  $R = \log\left(\frac{m_1(1-m_2)}{m_2(1-m_1)}\right)$  as the 'underlying' and observed log-odds ratios respectively. To first order

$$\begin{aligned} SE\{R\} &= \sqrt{\frac{1}{2m_1 n_1} + \frac{1}{2(1-m_1)n_1} + \frac{1}{2m_2 n_2} + \frac{1}{2(1-m_2)n_2}} \\ &\approx \sqrt{\frac{1}{2m(1-m)}} \sqrt{\frac{1}{n_1} + \frac{1}{n_2}} \end{aligned} \quad (3.1)$$

The observed  $Z$  score is, to first order,  $Z = \frac{R}{SE(R)}$ . Now

$$\begin{aligned} E(Z|\mu, r) &\approx r \sqrt{\frac{2\mu(1-\mu)n_1 n_2}{n_1 + n_2}} \\ SD(Z|\mu, r) &\approx 1 \end{aligned} \quad (3.2)$$

Consider  $r$  as a  $N(0, \sigma^2)$  random variable, and fix  $\mu$ . Now, to first order

$$Z|\mu \sim N\left(0, 1 + \frac{2\mu(1-\mu)\sigma^2 n_1 n_2}{n_1 + n_2}\right) \quad (3.3)$$

Assuming  $\mu$  to have an approximately uniform distribution on  $(0, 0.5]$ , this gives

$$Z \sim N\left(0, 1 + \frac{\sigma^2 n_1 n_2}{3(n_1 + n_2)}\right) \quad (3.4)$$

An interpretable description of the underlying odds-ratio distribution is the 0.975 quantile of 'true' odds ratios (approximately 2 standard deviations). If 97.5% of 'true' odds ratios  $r$  fall in  $[1/\alpha, \alpha]$ , then  $\sigma \approx \frac{\log(\alpha)}{2}$  and the expected value of the corresponding observed standard deviation of  $Z$  (that is,  $\sigma_2$ ,  $\sigma_3$ , or  $\tau$ ) is

$$\sqrt{1 + \frac{\log(\alpha)^2 n_1 n_2}{12(n_1 + n_2)}} \quad (3.5)$$

Some examples are shown in table 3.2:

| $\alpha$ | $SD$ | Study size ( $n_1/ n_2$ ) |         |         |          |           |           |
|----------|------|---------------------------|---------|---------|----------|-----------|-----------|
|          |      | 100/100                   | 100/500 | 500/500 | 500/1000 | 1000/1000 | 2000/2000 |
| 1.1      | 0.05 | 1.02                      | 1.03    | 1.09    | 1.12     | 1.17      | 1.32      |
| 1.2      | 0.09 | 1.07                      | 1.11    | 1.30    | 1.39     | 1.54      | 1.94      |
| 1.3      | 0.13 | 1.13                      | 1.22    | 1.56    | 1.71     | 1.97      | 2.60      |
| 1.5      | 0.20 | 1.30                      | 1.46    | 2.10    | 2.36     | 2.80      | 3.83      |
| 2        | 0.35 | 1.73                      | 2.08    | 3.31    | 3.79     | 4.58      | 6.41      |

Table 3.2: Correspondence between odds-ratio distribution and standard deviation of observed  $Z$  score for various study sizes. Column  $\alpha$  is the 97.5 % quantile of population odds-ratios for SNPs with non-zero effect sizes (approximately two standard deviations). Column  $SD$  is the corresponding standard deviation of the underlying log-odds ratio distribution (assumed to be normal). Entries in the table correspond to expected standard deviations of observed  $Z$  scores; that is,  $\sigma_2$ ,  $\sigma_3$  or  $\tau$ . We allow different odds-ratio distributions between cases and controls for SNPs in categories 2 and 3 (corresponding to  $\sigma_2$  and  $\sigma_3$  respectively). For  $\sigma_2$  or  $\sigma_3$ ,  $n_1$  is the number of cases and  $n_2$  the number of controls; for  $\tau$ ,  $n_1$  and  $n_2$  are the number of cases in each disease subgroup.



## Note 4

# Genetic correlation as an alternative to PLR test

### 4.1 Overview

The presence of genetic heterogeneity between disease subgroups could be tested for by adapting several known methods, although to our knowledge no specific method has yet been developed. One potential approach is to estimate the narrow-sense genetic correlation ( $r_g$ ) across a set of SNPs between case/control traits of interest, either between  $Z$  scores derived from comparing the control group to each case subgroup, testing under the null hypothesis  $r_g = 1$  (method 1); or between the familiar  $Z_a$  and  $Z_d$ , under the null hypothesis  $r_g = 0$  (method 2).

This approach should have the advantage of characterising heterogeneity using a single widely-interpretable metric. However, both methods have, in our naive application, have multiple shortcomings which preclude their general use to subgroup testing. The most important of these are systematic false-positives arising in method 1, and false-negatives arising in method 2. We demonstrate this theoretically and in simulations. In addition, genetic correlation is a signed test statistic; genetic effects in the same direction contribute positively, and opposite directions contribute negatively, causing a loss of power in situations where pleiotropy between the phenotypes involves shared effects of both types. Finally, we found that tests involving  $r_g$  were less powerful than the PLR in rejecting the null hypothesis in real genetic data (ATD; GD vs HT).

Genetic correlation is an estimate of the similarity in genetic basis of two traits. A useful formal definition is given by Bulik-Sullivan et al [2]. Let  $S$  be a set of SNPs and  $X$  denote a vector of additively coded genotypes (0, 1 or 2) for a random individual at the SNPs in  $S$ . For traits  $Y_1, Y_2$  set

$$\begin{aligned}\beta &= \arg \max_{\alpha \in \mathbb{R}^{|S|}, \|\alpha\|=1} \text{cor}(Y_1, X^t \alpha) \\ \gamma &= \arg \max_{\alpha \in \mathbb{R}^{|S|}, \|\alpha\|=1} \text{cor}(Y_2, X^t \alpha)\end{aligned}\tag{4.1}$$

where the maximum is taken across the entire population. The genetic correlation between traits across SNPs in  $S$ ,  $r_g$ , is then given by

$$r_g = \frac{\beta^t \gamma}{\|\beta\| \|\gamma\|} = \sum_{i \in S} \beta_i \gamma_i\tag{4.2}$$

### 4.2 Method 1: control-subgroup 1 vs control-subgroup 2

#### 4.2.1 Expected behaviour

We firstly consider method 1. In this approach, we consider two case-control comparisons:

1. Case subgroup 1 *vs* control group
2. Case subgroup 2 *vs* control group

We denote  $Z$  scores derived from GWAS p-values comparing between controls and subgroup 1 by  $Z_1$  and scores between controls and subgroup 2 by  $Z_2$  (figure 4.1). An estimated genetic correlation significantly less than 1 (or at least significantly less than estimates from random subgroups) may indicate different causative architectures for the subgroups, in the form of differing relative effect sizes for disease-associated variants.

However, using this method will not distinguish between different disease-causative architectures and genetic differences between subgroups unrelated to the overall phenotype. In terms of the parameters of our three-categories model, method 1 will be liable to reject the null whenever  $\tau > 1$ , regardless of whether  $\sigma_3 > 1$  (that is, regardless of whether subgroup-differentiating SNPs are in general disease-associated). Indeed, for a set value of  $\tau$ , the negative contribution of SNPs in group 3 to the observed  $r_g$  will often be maximised when  $H_0$  holds; that is,  $\sigma_3 = 1$ .

Consider a SNP in category 3. Under a simple model in which case subgroups are the same size, we denote by  $\mu_c$  the population MAF of the SNP in controls, and  $\mu_1$  and  $\mu_2$  the population AF of the same allele in cases. To first order  $Z_1 \propto \mu_1 - \mu_c$  and  $Z_2 \propto \mu_2 - \mu_c$ . Assume  $\mu_1 - \mu_2$  is set at some constant  $m > 0$ . Because  $m > 0$ , the SNP is associated with at least one of the subgroups, and hence contributes to the genetic correlation. The value of this contribution to the correlation is proportional to  $Z_1 Z_2$ , which is proportional to  $(\mu_1 - \mu_c)(\mu_2 - \mu_c)$ .

This is minimised when  $\mu_c = \frac{1}{2}(\mu_1 + \mu_2)$ . This is exactly the scenario in which the genetic subgroup differences are unrelated to the phenotype as a whole. In other words, dividing the case group on an arbitrary genetically-associated phenotype (ie hair colour, ethnicity, presence of a second unrelated disease) would lead to a lowering of  $r_g$  *more* than would a differential disease process with the same heritability (figure 4.1).

#### 4.2.2 Simulations

We demonstrated this on our ATD dataset by using the subgroups generated under  $H_0$  as in simulation 1b (see section 3.2). These subgroups had a true value of  $\tau$  greater than 1, but  $\sigma_3 = 1$  and  $\rho = 0$ .

For each simulated subgroup, we computed the genetic correlation between the two studies using two methods - LD score regression (LDSC) [2] and genome-wide complex trait analysis (GCTA) [3] - and computed our PLR statistic. We also computed genetic correlation and PLR scores for multiple random subgroups of the ATD case group. Significance of the genetic correlation was assessed by either comparing the observed  $r_g$  to the values observed in random subgroups (LDSC) or comparing the likelihood of the observed data with an alternative model in which  $r_g \equiv 1$ .

As expected,  $r_g$  estimates using both methods were markedly lower in subgroups with simulated genotypic differences than they were in random subgroups (figure 4.2). In the LDSC method, a cutoff of  $p < 0.05$  led to rejecting the null in of 45% (SE 2%) of cases, and in GCTA in in 29% (SE 5%) of cases. The PLR method did not reject the null more often than expected, rejecting the null in 4% (SE 1%) of cases.

#### 4.2.3 Application to real data

We also used both LDSC and GCTA to test the hypothesis of differential genetic architecture in GD and HT. The GCTA method was unable to reject the null hypothesis ( $p = 0.217$ ), using a likelihood ratio test against a null model with  $r_g = 1$ . The LDSC method was able to reject the null at  $p < 0.05$ , though not at the same significance as the PLR (LDSC:  $p = 0.012$ , PLR  $p = 2.2 \times 10^{-15}$ ). This suggests that the  $r_g$  based methods are less powerful than the PLR in this context. This is likely due to the PLR responding to an additional degree of freedom ( $\sigma_3$ ) between the null and full models.



### 4.3 Method 2: $Z_d$ (case vs control) vs $Z_a$ (subgroup 1 vs 2)

#### 4.3.1 Expected behaviour, and relation of $\rho_g$ to $\rho$

In method 2, we consider the two case-control comparisons:

1. Combined case group *vs* control group
2. Case subgroup 1 *vs* case subgroup 2

analogous to our approach in the PLR method, with the two comparisons corresponding to  $Z_a$  and  $Z_d$  respectively. We estimate  $r_g$  between these two traits, and test against the null hypothesis that  $r_g = 0$ .

The value of  $r_g$  relates to the estimated value of  $\rho_g$  in our full model. For a set  $S$  of disease-associated SNPs with additive (non-epistatic) effects in linkage equilibrium, and a binary trait  $y$ , we have

$$\text{cor}(y, X^t \alpha) = \sum_{i \in S} \text{cor}(y, \alpha_i X_i) = \sum_{i \in S} \alpha_i \text{cor}(y, X_i) \quad (4.3)$$

This is maximised when  $\alpha_i \propto \text{cor}(y, X_i)$ . If  $\mu_1(i)$  denotes the AF of SNP  $i$  in  $S$  amongst the population with  $y = 1$ ,  $\mu_0(i)$  the corresponding  $\mu_c(i)$  the overall AF of SNP  $i$  and  $p$  the incidence of the trait in the population (that is,  $\text{Pr}(y = 1)$ ), we have

$$\text{cor}(y, X_i) = \sqrt{2p(1-p)} \frac{\mu_1(i) - \mu_0(i)}{\sqrt{\mu_c(i)(1 - \mu_c(i))}} \quad (4.4)$$

Given observed allele frequencies  $m_1(i)$ ,  $m_0(i)$  at SNP  $i$  in a GWAS between traits 1 and 2 with  $n_1$  and  $n_0$  samples respectively, the Z score for significance of that SNP is

$$\begin{aligned} Z(i) &= \frac{m_1(i) - m_0(i)}{SE(m_1(i) - m_0(i))} + O((m_1(i) - m_0(i))^2) \\ &= \frac{m_1(i) - m_0(i)}{\sqrt{\frac{m_1(i)(1-m_1(i))}{n_1} + \frac{m_0(i)(1-m_0(i))}{n_0}}} + O((m_1(i) - m_0(i))^2) \end{aligned} \quad (4.5)$$

so

$$\lim_{\substack{n_1, n_0 \rightarrow \infty \\ |\mu_1 - \mu_0| \rightarrow 0}} \left( \frac{1}{n_1} + \frac{1}{n_0} \right) \frac{Z(i)}{\text{cor}(y, X_i)} = \sqrt{p(1-p)} \quad (4.6)$$

Amongst SNPs in LE with small effect sizes ( $\mu_1 - \mu_0$  small), expression 4.3 is maximised for  $\alpha_i \propto \lim_{n_1, n_0 \rightarrow \infty} Z(i)$ . If we denote by  $Z_{1i}$ ,  $Z_{2i}$  the GWAS Z scores for SNP  $i$  in phenotypes 1 and 2 respectively in studies with all group sizes  $\Theta(n)$ , the genetic correlation between the phenotypes is

$$r_g \approx \lim_{n \rightarrow \infty} \frac{\sum_{i \in S} Z_{1i} Z_{2i}}{\sqrt{\sum_{i \in S} Z_{1i}^2 \sum_{i \in S} Z_{2i}^2}} \quad (4.7)$$

The sum is over all SNPs  $S$ , but the only SNPs with non-vanishing contributions to  $r_g$  are those which are associated with both phenotypes. For the two traits in method 2, these SNPs are exactly those which are in our (idealised) category 3 in our full model. Writing  $C_i$  as the category of the SNP  $i$  we can rewrite the above as

$$r_g \approx \lim_{n \rightarrow \infty} \frac{\sum_{i \in S} I(C_i = 3) Z_{1i} Z_{2i}}{\sqrt{\sum_{i \in S} I(C_i = 3) Z_{1i}^2 \sum_{i \in S} I(C_i = 3) Z_{2i}^2}} \quad (4.8)$$

for which an obvious estimator is

$$\hat{r}_g = \frac{\sum_{i \in S} Pr(C_i = 3) Z_{1i} Z_{2i}}{\sqrt{\sum_{i \in S} Pr(C_i = 3) Z_{1i}^2 \sum_{i \in S} Pr(C_i = 3) Z_{2i}^2}} \quad (4.9)$$

If we were to define our full model such that  $Z_a, Z_d$  for SNPs in category 3 were distributed as a single bivariate Gaussian distribution with covariance  $\rho'$  (as opposed to our current model of two symmetric Gaussians), the updating step for  $\rho$  in the E-M algorithm would have a similar form. Indeed, if  $\Theta_{n-1}$  is the set of estimates for  $\{\pi_1, \pi_2, \sigma_2, \sigma_3, \tau, \rho'\}$  after step  $n - 1$  of the E-M algorithm, the updating steps for  $\rho', \tau, \sigma_3$  are

$$\begin{aligned} (\rho')_n &\leftarrow \frac{\sum_{i \in S} Pr(C_i = 3 | \Theta_{n-1}) Z_a(i) Z_d(i)}{\sum_{i \in S} Pr(C_i = 3 | \Theta_{n-1})} \\ (\sigma_3)_n &\leftarrow \sqrt{\frac{\sum_{i \in S} Pr(C_i = 3 | \Theta_{n-1}) Z_a(i)^2}{\sum_{i \in S} Pr(C_i = 3 | \Theta_{n-1})}} \\ (\tau)_n &\leftarrow \sqrt{\frac{\sum_{i \in S} Pr(C_i = 3 | \Theta_{n-1}) Z_d(i)^2}{\sum_{i \in S} Pr(C_i = 3 | \Theta_{n-1})}} \end{aligned} \quad (4.10)$$

and hence when the E-M algorithm converges,  $\rho' / (\sigma_3 \tau)$  is an estimator for  $r_g$ . Testing  $r_g \neq 0$  in this scenario is broadly equivalent to testing whether  $\rho' \neq 0$  in the adapted full model.

When developing the PLR method, we chose not to use this simpler model, opting for a more complex two-Gaussian distribution of  $(Z_a, Z_d)$  for SNPs in category 3. There were several reasons for our choice. Importantly,  $\rho' \neq 0$  implies  $\rho > 0$ , so the test  $r_g \neq 0$  tests a more specific proposition than the PLR.

Testing for  $\rho' \neq 0$  or  $r_g \neq 0$  is weakened when  $Z_a$  and  $Z_d$  are correlated at some group of SNPs and anticorrelated at others. We note that this simultaneous correlation and anticorrelation is likely in many biological scenarios. Given two disease subgroups 1 and 2, deleterious variants associated only with subgroup 1 will have correlated  $Z_a, Z_d$  values, whereas deleterious variants associated only with subgroup 2 will have anticorrelated  $Z_a$  and  $Z_d$ .

In addition, the presence of between-subgroup heterogeneity, as characterised by the presence of SNPs with simultaneously high  $|Z_d|$  and  $|Z_a|$  values, does not require that  $Z_a$  and  $Z_d$  have to be correlated or anticorrelated at all. The presence of a set of SNPs whose marginal variances of  $Z_a$  and  $Z_d$  are simultaneously significantly larger than 1 is sufficient evidence for heterogeneity of disease basis. This was the impetus for including the additional parameter  $\sigma_3$  in the full model.

Uncorrelated  $Z_a$  and  $Z_d$  may well occur in situations where the main sources of variation between the subgroups are only weakly associated with the overall phenotype, while less associated variants are strongly associated. This would be expected to occur in situations where the subtypes have known genetic differences. If, for example, a subgrouping phenotype was based on visual acuity in the phenotype of symptomatic Type 2 diabetes, variants associated with general macular degeneration would have large  $|Z_d|$  scores with low  $|Z_a|$  scores, while variants associated with microvascular glucose sensitivity would have larger  $|Z_a|$  scores and smaller (but still overdispersed)  $|Z_d|$  scores.

The behaviours of  $r_g / \rho', \rho, \tau$  and  $\sigma$  in various scenarios are summarised in supplementary table 1. Overall, we consider that while  $\rho_g$  is a useful statistic, it does not capture the variety of forms that disease heterogeneity can take.

### 4.3.2 Simulations

We tested the ability of GCTA to reject the null hypothesis  $r_g = 0$  on simulated data. We simulated genotypes for 4000 controls and 2000 cases in each of two subgroups at 10000 SNPs in linkage equilibrium. Genotypes were simulated in such a way that  $Z_a$  and  $Z_d$  scores would have the distributions

$$\begin{aligned} \begin{pmatrix} Z_d \\ Z_a \end{pmatrix} &\sim N \left( \begin{pmatrix} 0 \\ 0 \end{pmatrix}, \begin{pmatrix} 1 & 0 \\ 0 & 1 \end{pmatrix} \right) && \text{at 7000 SNPs } (\pi_1 = 0.7) \\ \begin{pmatrix} Z_d \\ Z_a \end{pmatrix} &\sim N \left( \begin{pmatrix} 0 \\ 0 \end{pmatrix}, \begin{pmatrix} 1 & 0 \\ 0 & 4 \end{pmatrix} \right) && \text{at 2000 SNPs } (\pi_2 = 0.1) \\ \begin{pmatrix} Z_d \\ Z_a \end{pmatrix} &\sim N \left( \begin{pmatrix} 0 \\ 0 \end{pmatrix}, \begin{pmatrix} 4 & \rho \\ \rho & 4 \end{pmatrix} \right) && \text{at } \xi * 1000 \text{ SNPs } (\pi_3 = 0.2) \\ \begin{pmatrix} Z_d \\ Z_a \end{pmatrix} &\sim N \left( \begin{pmatrix} 0 \\ 0 \end{pmatrix}, \begin{pmatrix} 4 & -\rho \\ -\rho & 4 \end{pmatrix} \right) && \text{at } (1 - \xi) * 1000 \text{ SNPs } (\pi_3 = 0.2) \end{aligned}$$

The value  $\xi$  represents the degree to which  $Z_a$ ,  $Z_d$  scores can show both correlation and anticorrelation, and  $\rho$  represents the extent of the correlation/anticorrelation. We ran simulations at  $\rho = 0$  and for  $\rho \in \{0, 0.5, 1, 2\}$  for  $\xi = 0$  (no anticorrelation),  $\xi = 0.2$  (mostly correlation, some anticorrelation) and  $\xi = 0.5$  (equal correlation and anticorrelation). The large value of  $\pi_3$  was to ensure that both PLR and GCTA should be well-powered to reject the null hypothesis where able, but not so well-powered as to be incomparable.

We estimated  $r_g$  using the GCTA method [3]. Significance was assessed using the provided likelihood-ratio test comparing the fitted model with a null model in which  $r_g = 0$ .

We did not test LDSC in this scenario, as it estimates  $r_g$  based on phenomena arising from the LD matrix, and simulation would entail setting an inherent effect size for these phenomena through specifying an LD matrix. Since the shortcomings we identify are with the use of  $r_g$  itself, rather than the method used to simulate it, we considered this reasonable.

As expected, the test based on  $r_g = 0$  was not able to reject the null hypothesis when  $\rho = 0$  or  $\xi = 0.5$ , and power was markedly reduced when some anticorrelation was present, at  $\xi = 0.2$  (figure 4.3, table 4.1). While the test was able to systematically reject the null hypothesis when  $\xi \in \{0, 0.2\}$ ,  $\rho > 0$ , the power was universally lower than that of the PLR test (table 4.1). This was likely due to information gained from the additional degree of freedom ( $\sigma_3$ ) between the full and null models in the PLR test. We did not simulate any scenarios where  $\sigma_3 = 1$ , as this would imply that SNPs in category 3 were not systematically associated with the subgrouping phenotype, and hence correlation with  $Z_a$  would be spurious.

### 4.3.3 Application to real data

Finally, we assessed whether we could reject  $H_0$  by testing against  $r_g = 0$  on our ATD dataset (MHC removed), with subtypes GD and HT. We used both the LDSC and GCTA methods to do this. While both were able to reject the null hypothesis (LDSC:  $r_g = -0.579$ ,  $p = 0.04$ , from known null distribution of  $\rho_g$ ; GCTA:  $r_g = -0.580$ ,  $p = 1 \times 10^{-3}$  from likelihood-ratio test) neither could do so as confidently as the PLR test ( $p = 2.2 \times 10^{-15}$ ).

Our proposed test is complex, and parametrises disease heterogeneity using several variables (namely  $\pi_3$ ,  $\sigma_3$ ,  $\tau$  and  $\rho$ ) rather than providing a single metric. We consider this complexity to be necessary; heterogeneity in a phenotype can arise in many ways and the heterogeneous genetic architecture can take many forms. A test specifically to detect SNPs with large, genome-wide significant effect sizes in one disease subgroup but not the other may miss heterogeneity characterised by subtle effect size differences across many SNPs with small effects. Our method can ideally detect heterogeneity in a general sense in multiple situations, and give insight into the architecture in the form of the fitted parameters.

| $\rho$ | $\xi$ | <b>GCTA</b>  | <b>PLR</b> |
|--------|-------|--------------|------------|
| 0      | 0     | 0.09 (0.002) | 1 (-)      |
| 0      | 0.2   | 0.12 (0.002) | 1 (-)      |
| 0      | 0.5   | 0.06 (0.002) | 1 (-)      |
| 0.5    | 0     | 0.55 (0.006) | 1 (-)      |
| 0.5    | 0.2   | 0.13 (0.004) | 1 (-)      |
| 0.5    | 0.5   | 0.06 (0.001) | 1 (-)      |
| 1      | 0     | 0.96 (0.002) | 1 (-)      |
| 1      | 0.2   | 0.59 (0.005) | 1 (-)      |
| 1      | 0.5   | 0.07 (0.002) | 1 (-)      |
| 2      | 0     | 1 (-)        | 1 (-)      |
| 2      | 0.2   | 1 (-)        | 1 (-)      |
| 2      | 0.5   | 0.04 (0.001) | 1 (-)      |

Table 4.1: Power of tests to reject the null hypothesis at  $\alpha = 0.05$  in simulated data. Brackets show standard error. Value  $\rho$  is the degree of correlation/anticorrelation between  $Z_d$  and  $Z_a$ . Value  $\xi$  is the degree of split between correlation and anticorrelation;  $\xi = 0$  corresponds to correlation only,  $\xi = 0.2$  to mostly correlation with some anticorrelation, and  $\xi = 0.5$  to a half/half mix. Testing for subgroup heterogeneity using GCTA is adequately powerful when correlation  $\rho$  is present, but declines markedly when both correlation and anticorrelation are present, and is effectively zero when  $p = 0.5$  or  $\rho = 0$ . The PLR-based test was able to reject  $H_0$  universally in all cases.

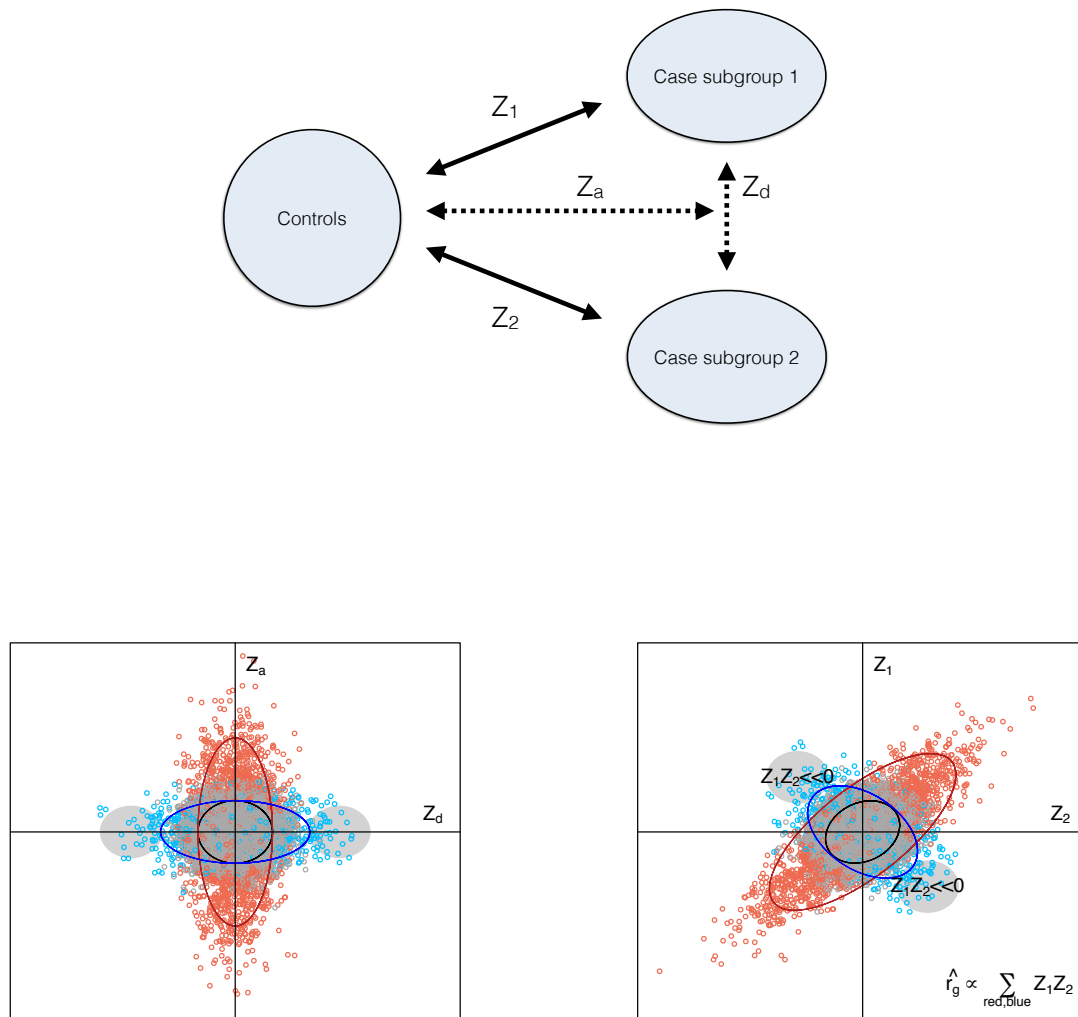

Figure 4.1: One way to test for phenotypic heterogeneity using genetic correlation ( $r_g$ ) is to estimate  $r_g$  for two separate case-control studies; each comparing the control group to one of the disease subgroups, and test whether the estimated  $r_g$  is significantly less than 1. We denote by  $Z_1$ ,  $Z_2$  the sets of  $Z$ -scores corresponding to allelic differences between controls and cases of subtype 1 and between controls and cases of subtype 2 respectively (top panel) in contrast to our usual  $Z_a$  and  $Z_d$  scores. A shortcoming of this method is that  $r_g$  is decreased by the presence of SNPs which show allelic differences between subtypes, but are unrelated to the phenotype overall. In this sense, the test  $r_g < 1$  is responsive to *any* genetic difference between subtypes - not just those which correspond to differing disease pathology. This scenario would arise if subgroups were defined based on a phenotype with non-zero heritability which was unrelated to the disease; eg, subgroups of T1D defined by hair colouring. The lower two panels demonstrate this scenario. The left panel shows (simulated)  $Z_a$  and  $Z_d$  scores for a set of SNPs under  $H_0$ , where grey corresponds to category 1, red to category 2, and blue to category 3. The right lower panel shows the corresponding sets of  $Z_1$  and  $Z_2$  values. SNPs in the grey circles, and generally SNPs coloured blue, will contribute negatively to the overall genetic correlation, which is asymptotically proportional to the sum of  $Z_1Z_2$  over all SNPs coloured red or blue.

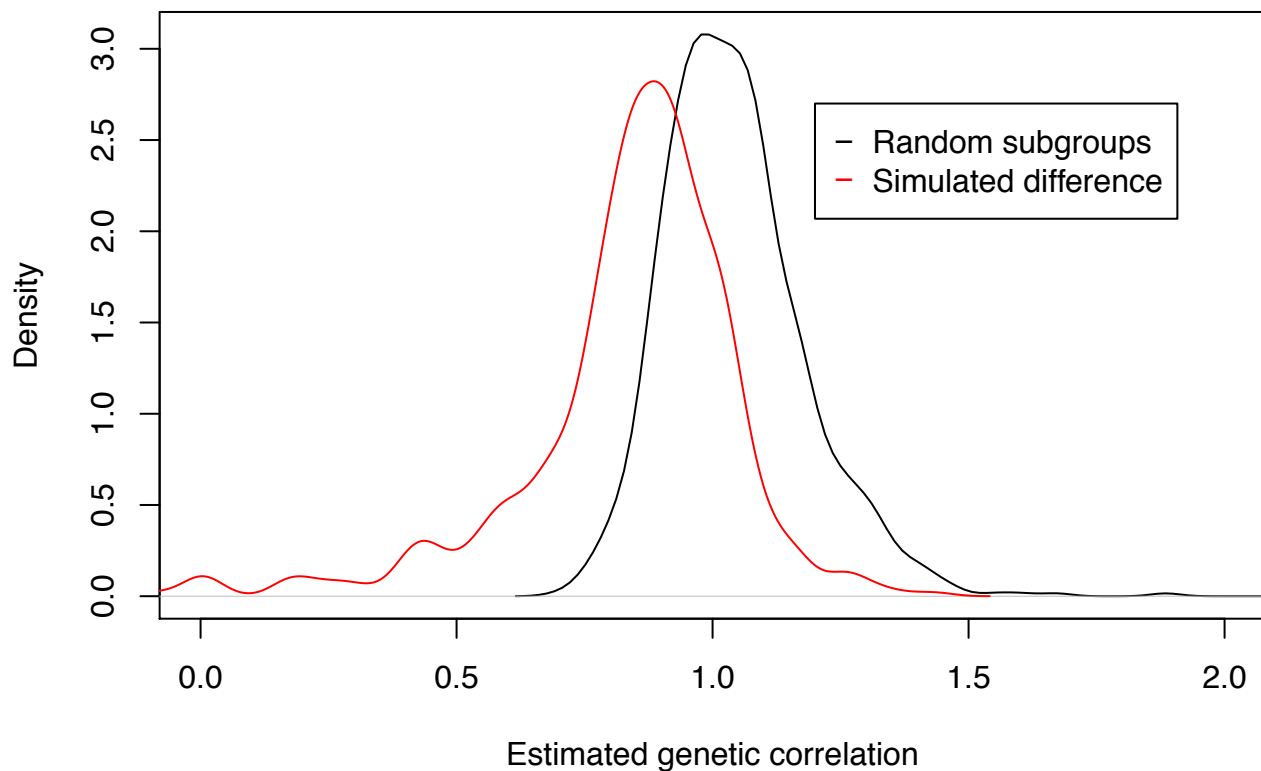

Figure 4.2: Density of estimated  $r_g$  (LDSC method) for method 1. Estimates for random subgroups generated under  $H_0$  are shown in black. Estimates for subgroups with a simulated difference ( $\tau > 1$ ) are shown in red. A test based on method 1 would reject  $H_0$  if  $r_g$  was significantly less than 1; however, as the plot shows, this would lead to systematic false positives in the scenario where  $\tau > 1$ . Some estimated values of  $r_g$  are greater than 1 due to the way the statistic is estimated under the LDSC method.

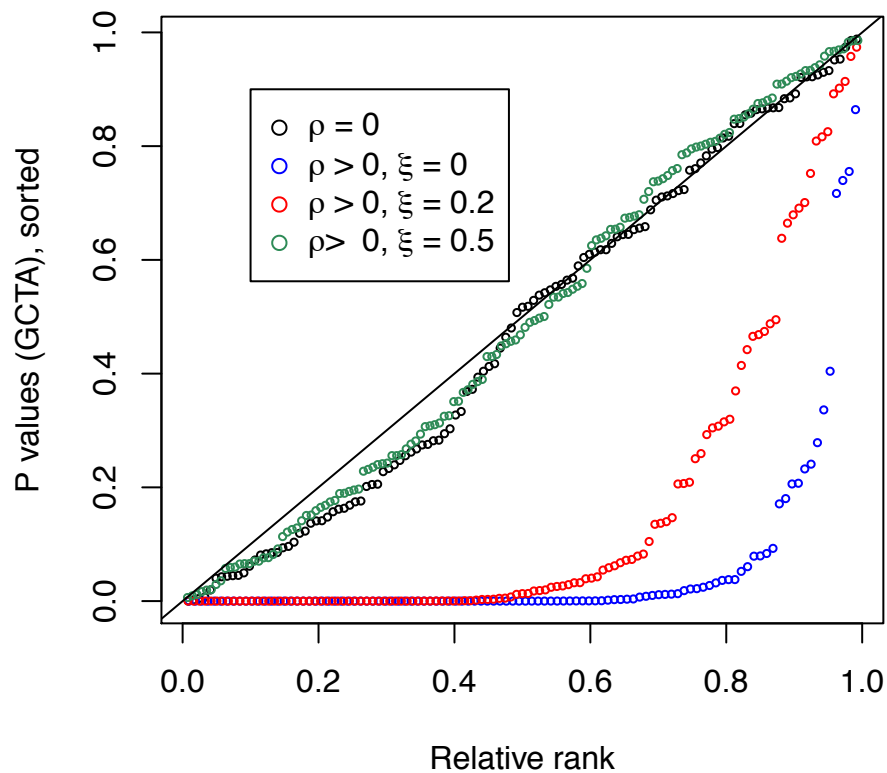

Figure 4.3: Sorted p values from test of null hypothesis  $r_g = 0$  under simulations in which  $\rho \in \{0, 0.5, 1, 2\}$  and  $\xi \in \{0, 0.2, 0.5\}$ . In all simulations,  $H_0$  is false (with  $\sigma_3 > 0$ ). GCTA is able to reject the null hypothesis only if  $\rho > 0$  and  $p \neq 0.5$ , and power is reduced (ie, p-values are higher) if  $p = 0.2$  compared to  $p = 0$ . If  $\rho = 0$  or  $\xi = 0.5$ , the p-values show effectively no deviation from  $U(0, 1)$ . Thus a test based on rejecting  $\rho_g = 0$  is not suitable for our purposes.





## Note 5

# Other

### 5.1 Alternative test statistics for retrospective single-SNP analysis

We propose four summary statistics for testing the degree to which single SNPs have differential effect sizes in disease subgroups. The fourth of these, the Bayesian conditional false discovery rate (cFDR) is discussed in the methods section of the main text. The three alternative statistics (which we term  $X_1$ ,  $X_2$ ,  $X_3$ ) test against slightly different null hypotheses.

The first,  $X_1$ , is the posterior probability of membership of the third category of SNPs under the full model; that is, for a SNP of interest with Z scores  $z_a$ ,  $z_d$  and given fitted parameters  $\Theta_1 = \{\pi_1, \pi_2, \pi_3, \sigma_2, \sigma_3, \tau, \rho\}$ :

$$\begin{aligned} X_1 &= Pr(\text{SNP} \in \text{category 3} | \Theta_1) \\ &= \frac{\frac{1}{2}\pi_3 \left( N_{\mathbf{0}, \begin{pmatrix} \tau^2 & \rho \\ \rho & \sigma_3^2 \end{pmatrix}}(z_a, z_d) + N_{\mathbf{0}, \begin{pmatrix} \tau^2 & -\rho \\ -\rho & \sigma_3^2 \end{pmatrix}}(z_a, z_d) \right)}{PDF_{\Theta_1}(z_a, z_d)} \end{aligned} \quad (5.1)$$

This test statistic has the advantage of straightforward FDR control against the null hypothesis  $H_0 = \{\text{SNP} \in \text{category 1/2} | \Theta_1\}$ , assuming the validity of  $\Theta_1$ . It also reflects the overall shape of the distribution. A disadvantage is the dependence on the model implied by  $\Theta_1$ ; in circumstances where  $\sigma_3 \gg \sigma_2$ , the test statistic  $X_1$  will be high for high values of  $|Z_a|$  even when  $|Z_d|$  is low (supplementary figures 7). This is a particular problem if tested regions include very strong associations; for example, the MHC region in autoimmune phenotypes.

Our second statistic,  $X_2$ , is the difference in pseudo-log likelihood of a given SNP under the full and null models; that is, given fitted parameters  $\Theta_1$  under  $H_1$  and  $\Theta_0$  under  $H_0$

$$X_2 = \log\{PL(z_a, z_d | \Theta_1)\} - \log\{PL(z_a, z_d | \Theta_0)\} \quad (5.2)$$

This has the advantage that high values of  $X_2$  directly identify the SNPs contributing to a higher pseudo-likelihood ratio. A disadvantage is the sensitivity to the behaviour of the fitted parameters under  $H_0$ , which may be variable (see main paper, results section, page 7 and table 2), and absence of direct FDR control. Because  $X_1$  and  $X_2$  tend to highlight uninteresting SNPs in differing circumstances, we found a combination of both to be useful to find SNPs which are 'unusual' (high  $X_1$ ) and contribute to the PLR (high  $X_2$ ).

The third test statistic is defined as  $X_3 = z_a^\alpha z_d^{1-\alpha}$ ,  $\alpha \in (0, 1)$ . We chose this test statistic as we are broadly searching for evidence of correlation between  $Z_a$  and  $Z_d$ , and SNPs contribute to measures of correlation principally through the value of  $Z_a Z_d$ . This test statistic identifies SNPs with concurrently high  $Z_a$  and  $Z_d$  in an obvious way, so is of most use when SNPs which differentiate subgroups are not of interest unless they are also associated with the overall phenotype.

The value of  $\alpha$  is set in order to prioritise SNPs with high  $Z_d$  over those with high  $Z_a$ ; for instance, with  $\alpha = 0.5$  will give equal weight to a SNP with  $Z_a = 10$ ,  $Z_d = 1$  and a SNP with  $Z_a = 1$ ,  $Z_d = 10$ , but in general the second SNP will be of far greater interest. To determine the best value of  $\alpha$ , we consider how much we may expect  $Z_a$  and  $Z_d$  to deviate from 0, using both the full and null models.

We set  $\tau'$  as the largest value of  $\tau$  across both models, and  $\sigma'$  as the largest of  $\sigma_2$  (null model) and  $\sigma_2, \sigma_3$  (full model). Given fitted values  $\tau', \sigma'$ , we suggest the value

$$\alpha = \frac{\log(\sigma')}{\log(\tau') + \log(\sigma')} \quad (5.3)$$

so that the statistic  $X_3$  has the same value at the points  $(1, \tau')$  and  $(\sigma', 1)$ . The rationale for this is that SNPs which have the true underlying distributions  $N_{\mathbf{0}, \begin{pmatrix} \tau'^2 & 0 \\ 0 & 1 \end{pmatrix}}$  or  $N_{\mathbf{0}, \begin{pmatrix} 1 & 0 \\ 0 & \sigma'^2 \end{pmatrix}}$  are uninteresting; we seek deviance from both of these distributions. A hypothesis test for  $X_3$  can then be computed, using the appropriate values of  $\pi_{(0,1,2)}$ .

Contour plots of the test statistics for several datasets are shown in supplementary figures 7,8.

## 5.2 Independence of PLR distribution on subgroup sizes

PLR and cPLR values for randomly chosen subgroups are all derived from data with the same  $Z_a$  values, with the distribution of  $Z_d$  expected to be  $N(0, 1)$  and independent of  $Z_a$  regardless of the relative sizes of random subgroups. Therefore we expect that the asymptotic distribution (main paper, equation 2 does not depend on relative subgroup size. An important consequence of this is that if several subgroupings of a phenotype are being simultaneously assessed, the empirical distribution of cPLR need only be calculated once.

We demonstrate this assertion by simulation. Using our autoimmune thyroid disease dataset, we simulated random subgroups from the combined case group (GH+HT) for a range of relative sizes, repeating the simulation 1000 times for each subgroup size. Figure 5.1 shows the observed distributions of PLR and cPLR as compared to the overall distribution. These plots are consistent with independence of empirical PLR and cPLR distributions on subgroup size.

## 5.3 Number of simulations necessary to fit null distribution

We assessed the number of simulated random subgroups required to estimate the parameters  $\gamma, \kappa$  of the null distribution of the cPLR. We took bootstrap samples of various sizes from our list of simulated random subgroups ( $\tau = 1$ ) of the ATD data. For each sample, we computed the fitted values of  $\gamma$  and  $\kappa$  and the observed p-values associated with observed PLR values of 2, 3, 5, and 10, i.e. expected p values 0.08, 0.03, 0.004 and  $1.5 \times 10^{-6}$  respectively (figure 5.2)

This suggests that 1000 simulations is generally adequate, and it is difficult to improve accuracy markedly past this point. For this number of simulations, 95% of computed values for  $\kappa, \gamma$ ,  $Pr(PLR > 2|\kappa, \gamma)$  and  $Pr(PLR > 5|\kappa, \gamma)$  were in [0.44, 0.56], [0.46, 0.72], [0.069, 0.97] and [0.0021, 0.0057] respectively. As expected, consistency of p-value estimates is poorer for lower p-values, as these correspond to greater extrapolations of the distribution.

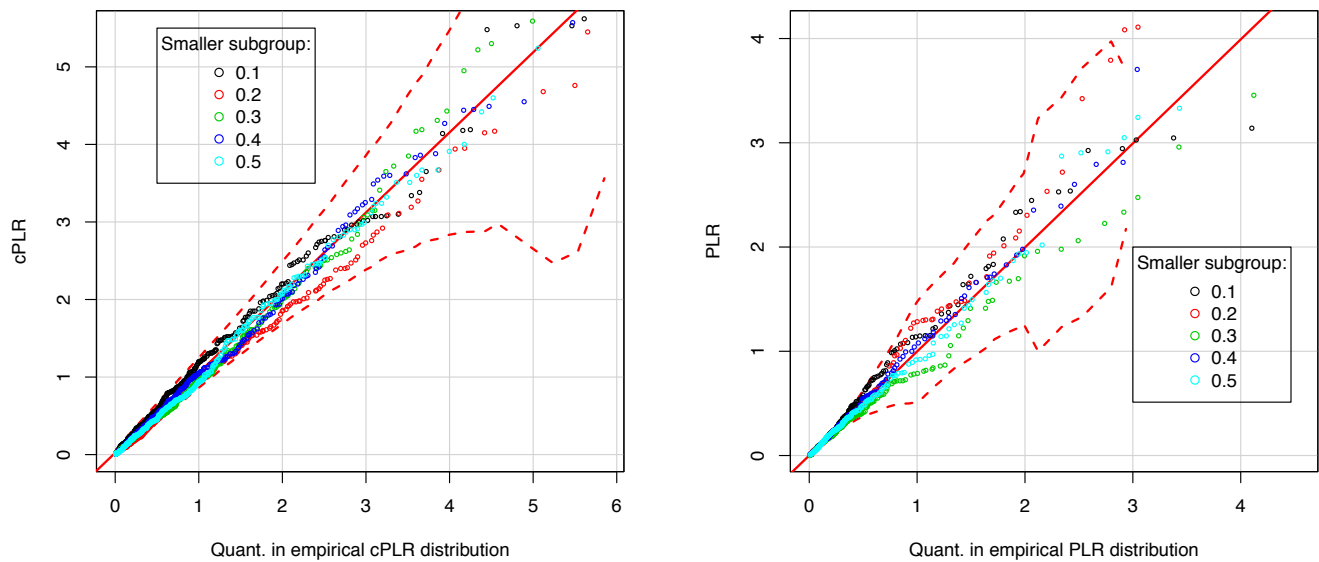

Figure 5.1: Distributions of PLR and cPLR for various relative sizes of subgroups. Simulations are on ATD data. Legend shows the proportion of cases in the smaller subgroup. Leftmost plot shows distribution of observed cPLR, rightmost distribution of PLR. Red dotted lines show empirical 99% confidence limits. Distributions are similar for all relative subgroup sizes.

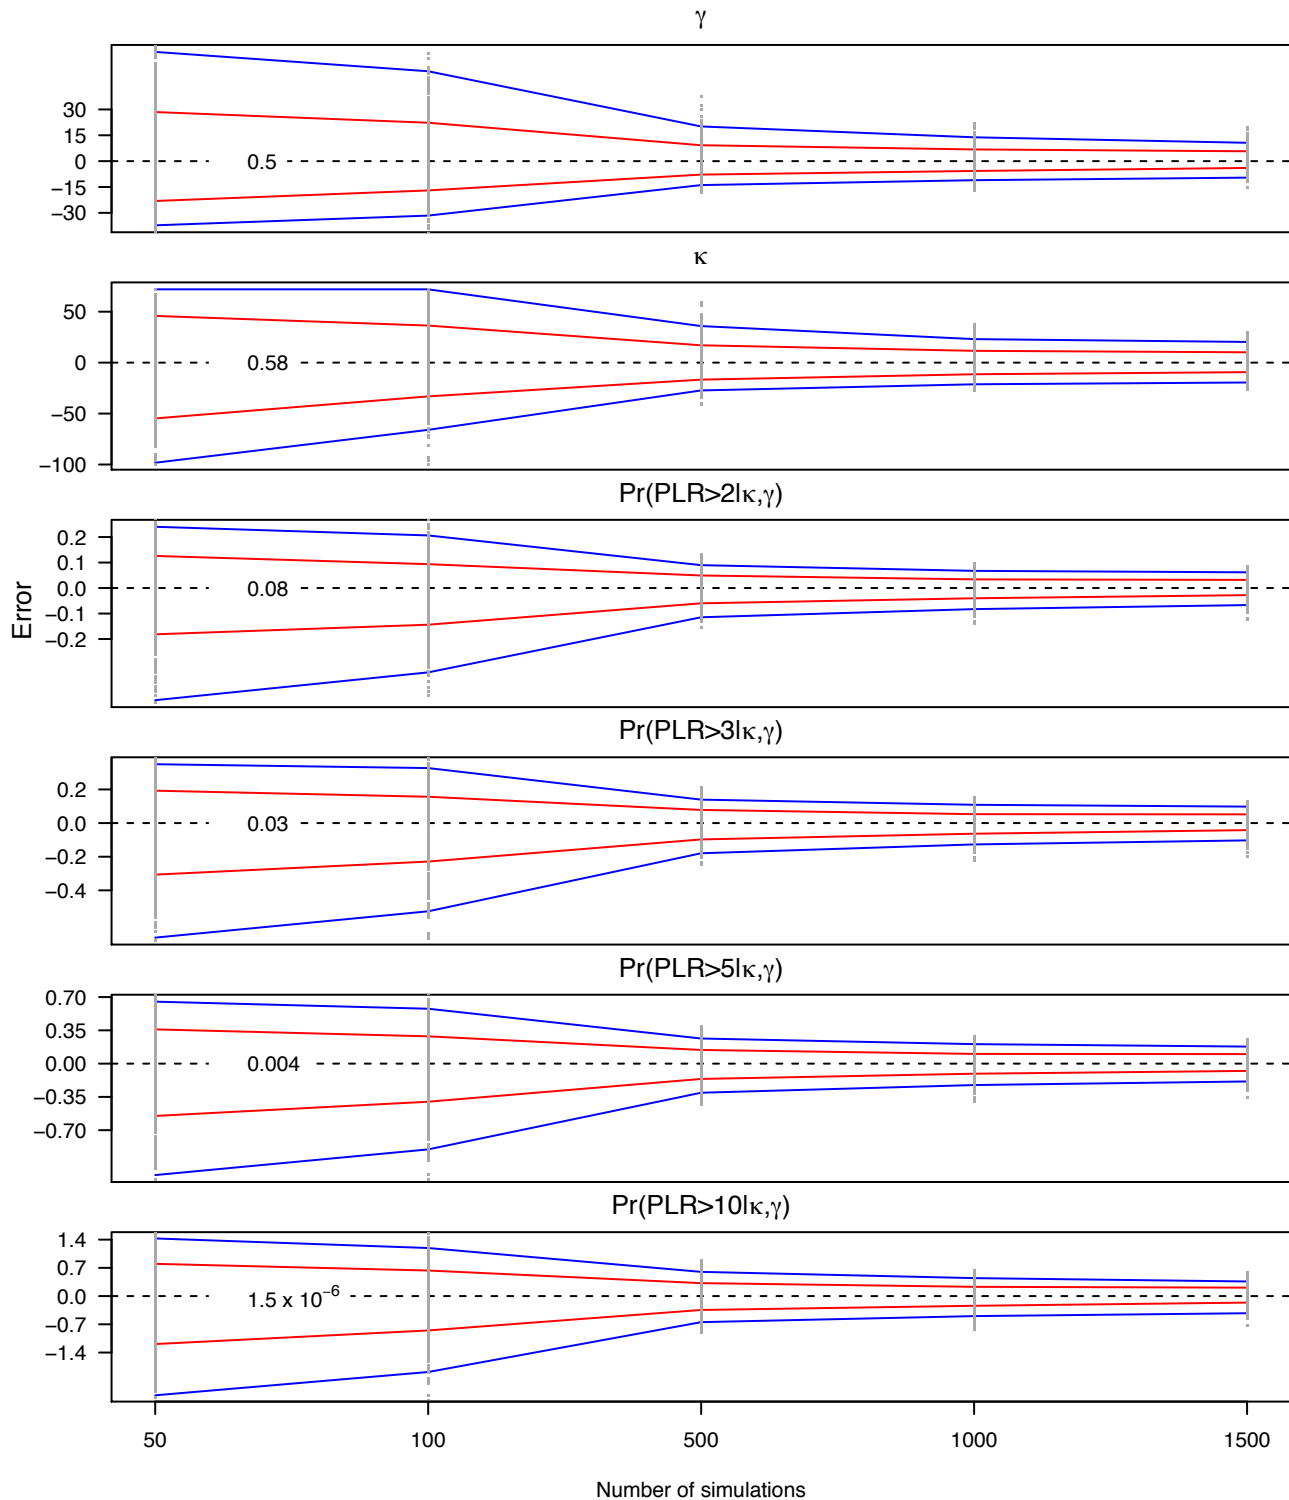

Figure 5.2: Distributions of estimated parameters  $\gamma$  and  $\kappa$  and various corresponding p-values, using various numbers of simulated random subgroups. Blue lines show quantiles of observed distribution corresponding to  $\pm 2\sigma$ ; red lines show quantiles corresponding to  $\pm \sigma$ . Errors in  $\gamma$  and  $\kappa$  are shown as percentage errors as compared to median. Errors in p-values are shown as  $\log_{10}$  fold changes from median. Values of the median value of each variable are shown. Observed values are shown as grey dots.

# Bibliography

- [1] Rodriguez-Calvo T, Sabouri S, Anquetil F, von Herrath MG (2016) The viral paradigm in type 1 diabetes: Who are the main suspects? *Autoimmunity Reviews* .
- [2] Bulik-Sullivan B, Finucane HK, Anttila V, Gusev A, Day FR, et al. (2015) An atlas of genetic correlations across human diseases and traits. *bioRxiv* .
- [3] Lee SH, Yang J, Goddard ME, Visscher PM, Wray NR (2012) Estimation of pleiotropy between complex diseases using single-nucleotide polymorphism-derived genomic relationships and restricted maximum likelihood. *Bioinformatics* 28: 2540–2542.

A method for identifying genetic heterogeneity within  
phenotypically-defined disease subgroups

Supplementary Figures

James Liley, John A Todd and Chris Wallace

December 14, 2016

**List of Supplementary Figures**

|   |                                                                                            |    |
|---|--------------------------------------------------------------------------------------------|----|
| 1 | Geographic subgroups . . . . .                                                             | 2  |
| 2 | Test statistics for geographically-defined disease subgroups . . . . .                     | 3  |
| 3 | Power of test at a range of values of $\pi_3$ , $\sigma_3$ , $\tau$ , and $\rho$ . . . . . | 6  |
| 4 | Distribution of observed cPLRs for random subgroups . . . . .                              | 8  |
| 5 | Z scores for autoantibody-based subgroups . . . . .                                        | 10 |
| 6 | Z scores for age at diagnosis in T1D . . . . .                                             | 11 |
| 7 | Comparison of test statistics for single-SNP effects (T1D/RA; GD/HT) . . . . .             | 16 |
| 8 | Single-SNP effects for TPOAb in T1D . . . . .                                              | 17 |
| 9 | Single-SNP effects for age at diagnosis in T1D . . . . .                                   | 18 |

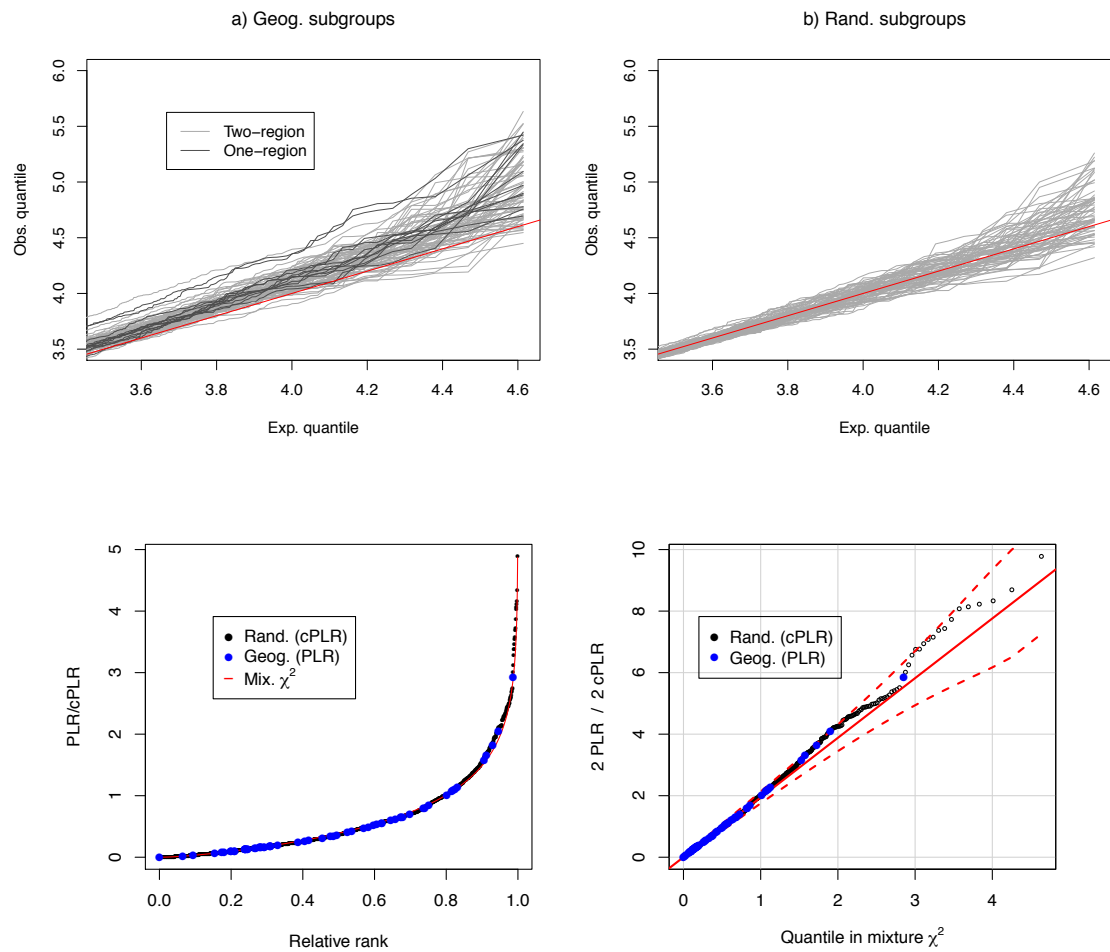

Supplementary Figure 1: Top plot shows  $Z_d$  scores arising from geography-based subgroups compared with expected normal. Leftmost plot shows quantiles of Z scores from geography based subgroups; two-region subgroups in light grey and one-region subgroups in dark grey. Considerable inflation is seen compared to Z-scores arising from random subgroups, in rightmost figure.

Lower plots show distribution of cPLR values from random subgroups against observed PLR values from geographically-defined subgroups. Leftmost plot shows cPLR values from random subgroups plotted in ascending with PLR values from random subgroups shown in blue. Rightmost plot is Q-Q plot comparing null cPLR distribution with the asymptotic mixture- $\chi^2$ .

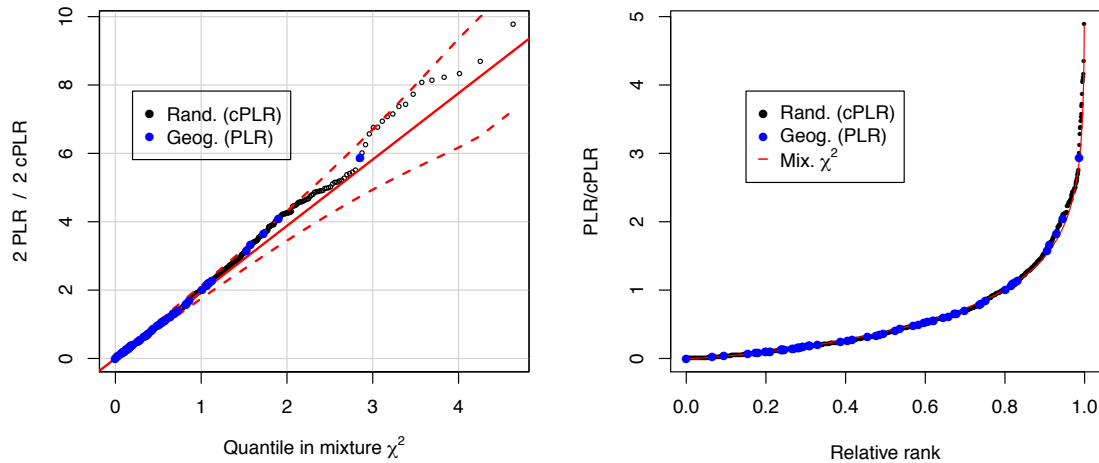

Supplementary Figure 2: Summary of test statistics (PLR) from geographically-defined subgroups, based on WTCCC data [1] for controls and type 1 diabetes (T1D). In each instance, one subgroup was defined as the controls coming from either one or two geographic regions, and the other subgroup as the controls coming from the remaining nine or ten geographic regions. We also generated > 2000 randomly allocated subgroups and computed the cPLR. The left panel shows a Q-Q plot of cPLR values from random subgroups against the asymptotic mixture- $\chi^2$  distribution, with blue points representing the PLRs of geographic subgroups. The right panel shows cPLR values plotted in ascending order with the PLR values from geographic subgroups included as blue points. The minimum Bonferroni-corrected empirical p value was > 0.5



N = 50 ( $\pi_3 = 0.001$ )

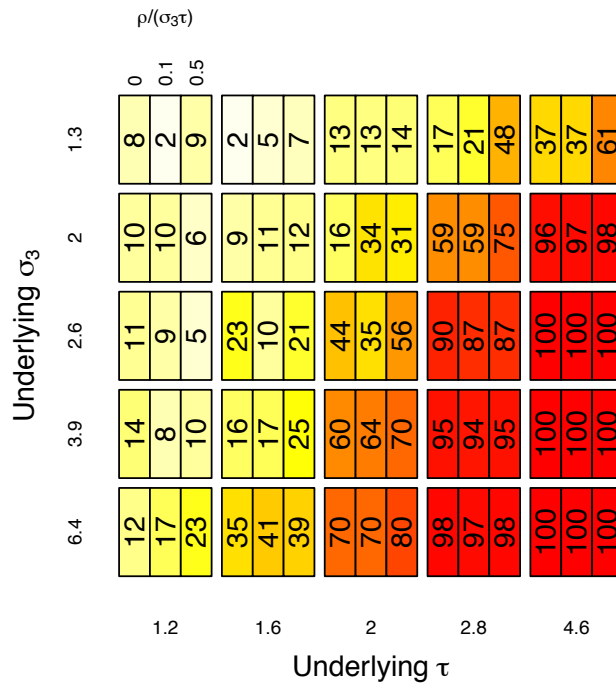

N = 100 ( $\pi_3 = 0.002$ )

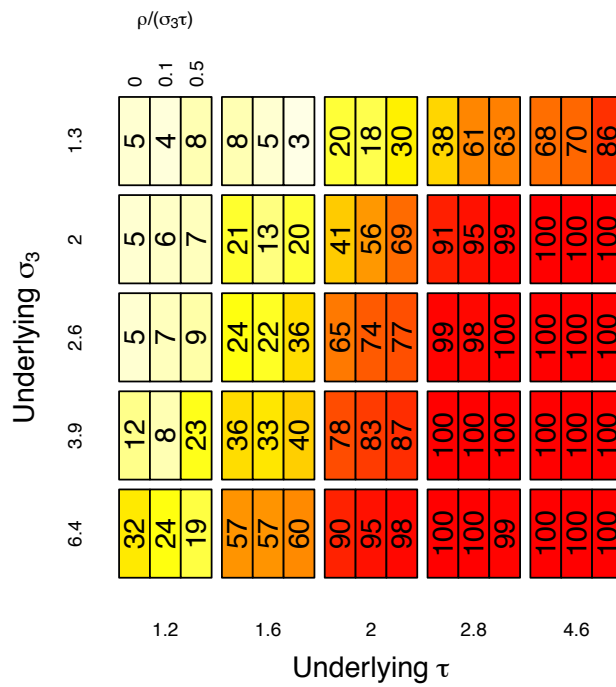



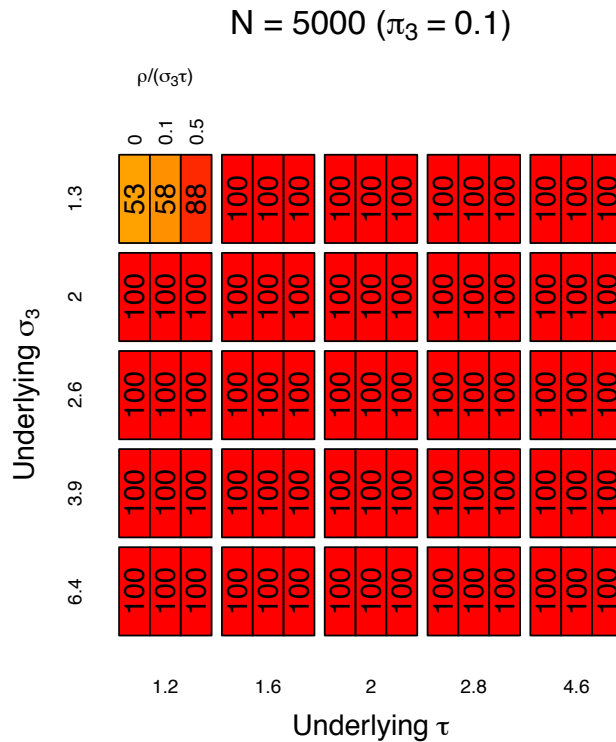

Supplementary Figure 3: Estimates of power for various values of  $\pi_3$ ,  $\sigma_3$ ,  $\tau$ , and  $\rho$ . The value N is the approximate number of SNPs in category 3, corresponding to  $\pi_3$ . In total, each simulation was on  $5 \times 10^4$  simulated autosomal SNPs in linkage equilibrium. The value  $\rho/(\sigma_3\tau)$  is the correlation (rather than covariance) between  $Z_a$  and  $Z_d$  in category 3.

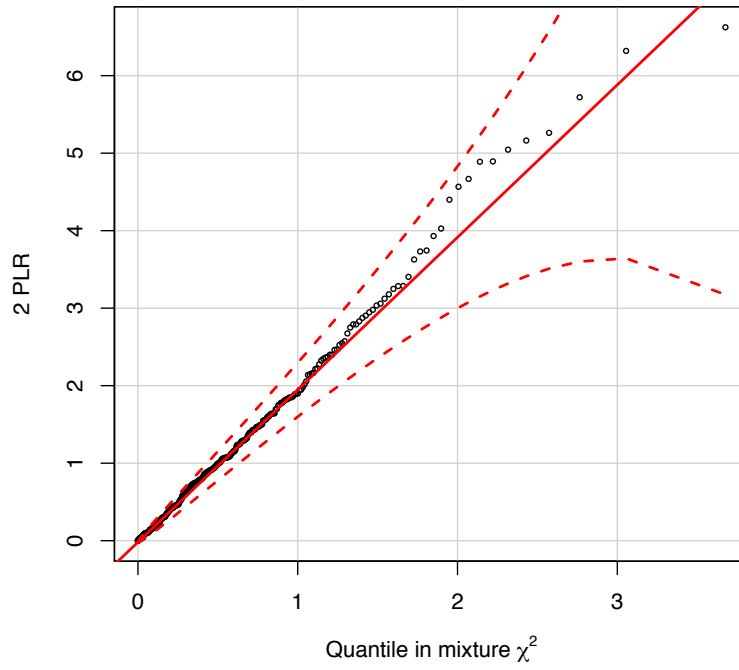

(a) T1D/T2D/RA data

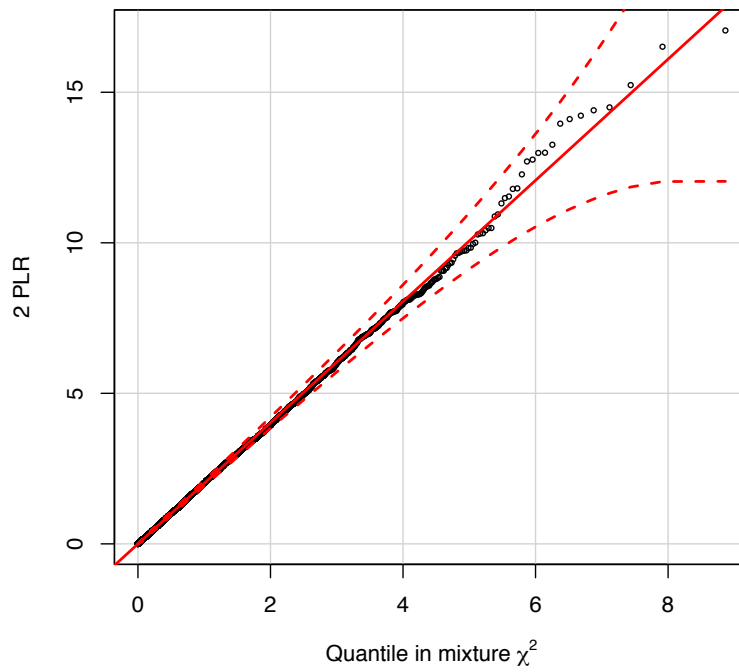

(b) ATD:GH/HT data

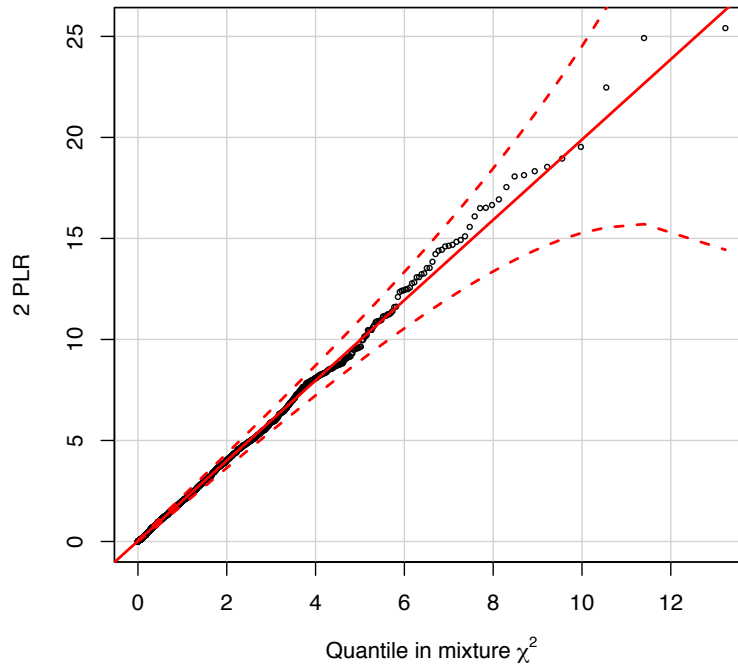

(c) T1D (AAB) data

Supplementary Figure 4: Q-Q plot of the distribution of observed test statistics (cPLR) for random subgroups of tested phenotypes (T1D/RA/T2D combined, GH/HT combined, T1D) against a mixture  $\chi^2$  distribution of the form  $\gamma * (\kappa\chi_1^2 + (1 - \kappa)\chi_2^2)$ . A 99% confidence interval is shown by the dashed red lines. The distribution is well-approximated by the asymptotic mixture- $\chi^2$  in all cases.

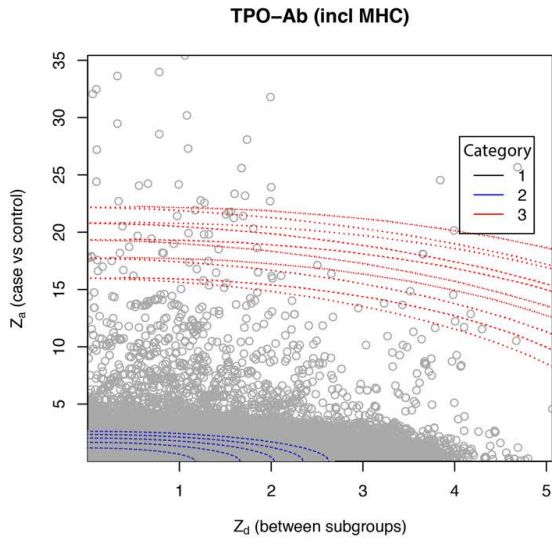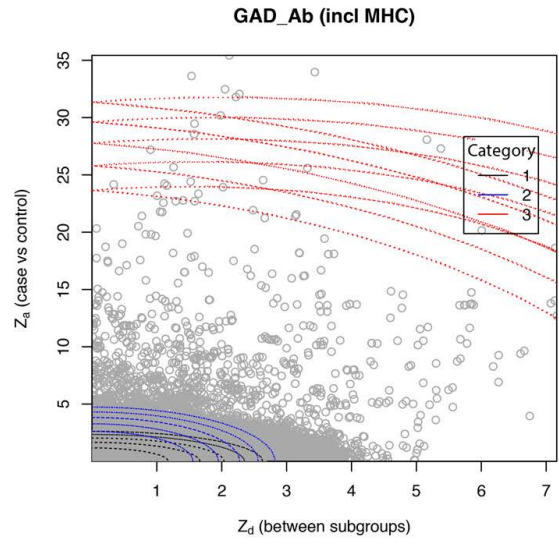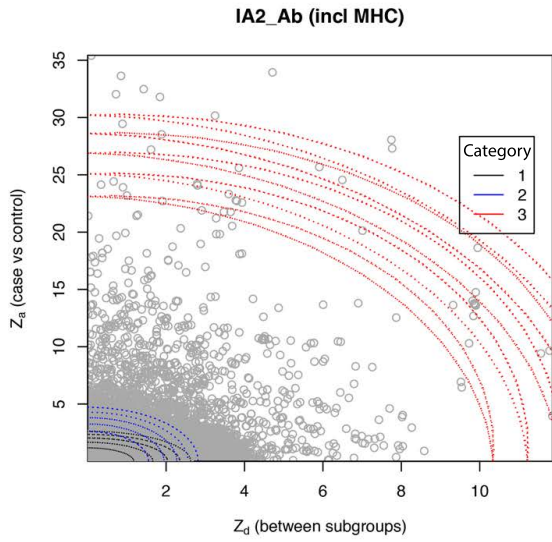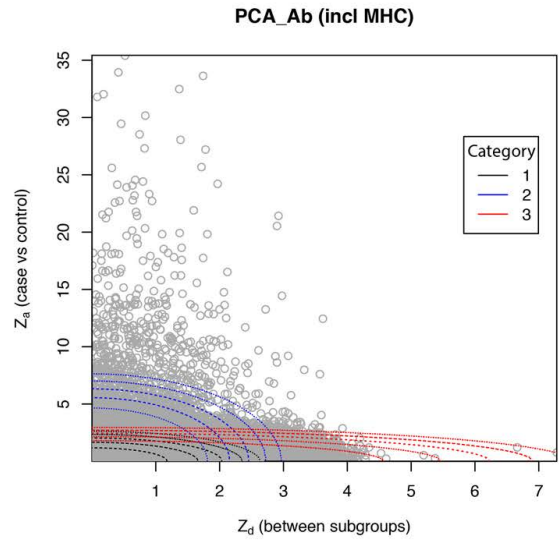

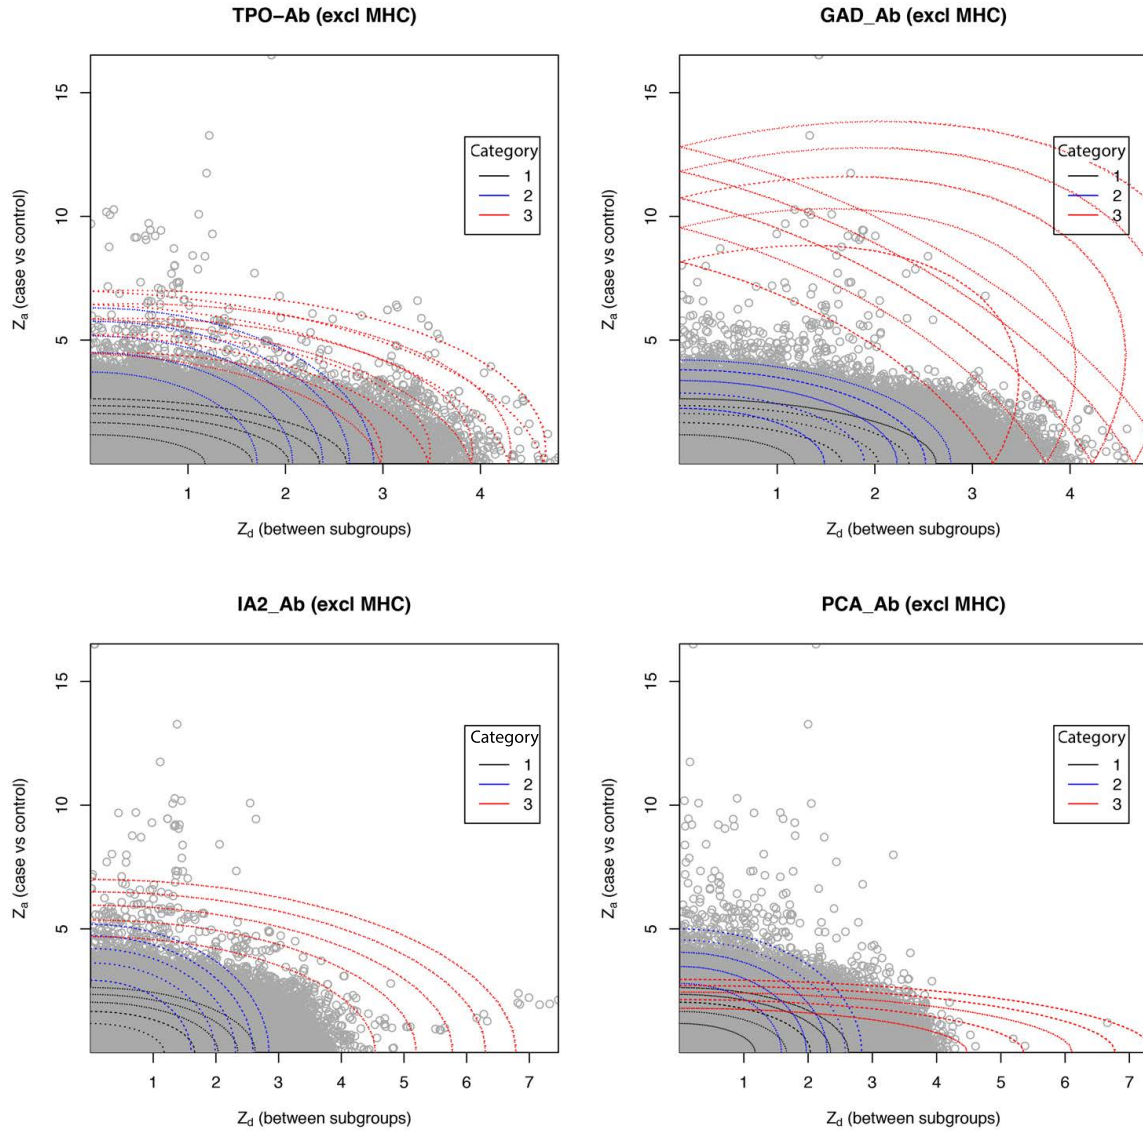

Supplementary Figure 5: Observed  $Z_a$  and  $Z_d$  scores (grey) for T1D subtypings based on autoantibody positivity, including or excluding the MHC region, and contours of parameters of fitted models (coloured ellipses). Full models are shown for the comparisons involving TPO-Ab, GAD-Ab, and IA2-Ab, and null models for PCA-Ab (for which the null hypothesis could not be rejected). Note the differing X-axis scales. The plots illustrate the rationale for the three-category model; for TPO-Ab, GAD-Ab and IA2-Ab, a tendency is seen for SNPs associated with autoantibody positivity (high  $|Z_d|$ ) to be associated with T1D also (high  $|Z_a|$ ). This tendency is not seen for PCA-Ab, and is minimal for non-MHC SNPs in GAD-Ab. Further analysis of the plot for TPOAb positivity (top left) is shown below.

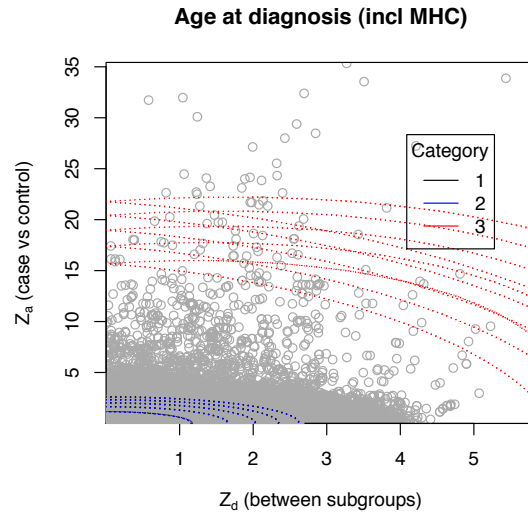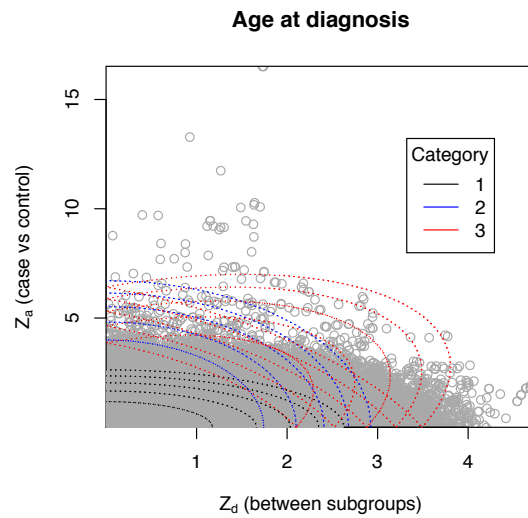

Supplementary Figure 6: Observed  $Z_a$  and  $Z_d$  scores for T1D subclassified by age at diagnosis. Non-MHC SNPs are shown in red.



(a) T1D/RA comparison

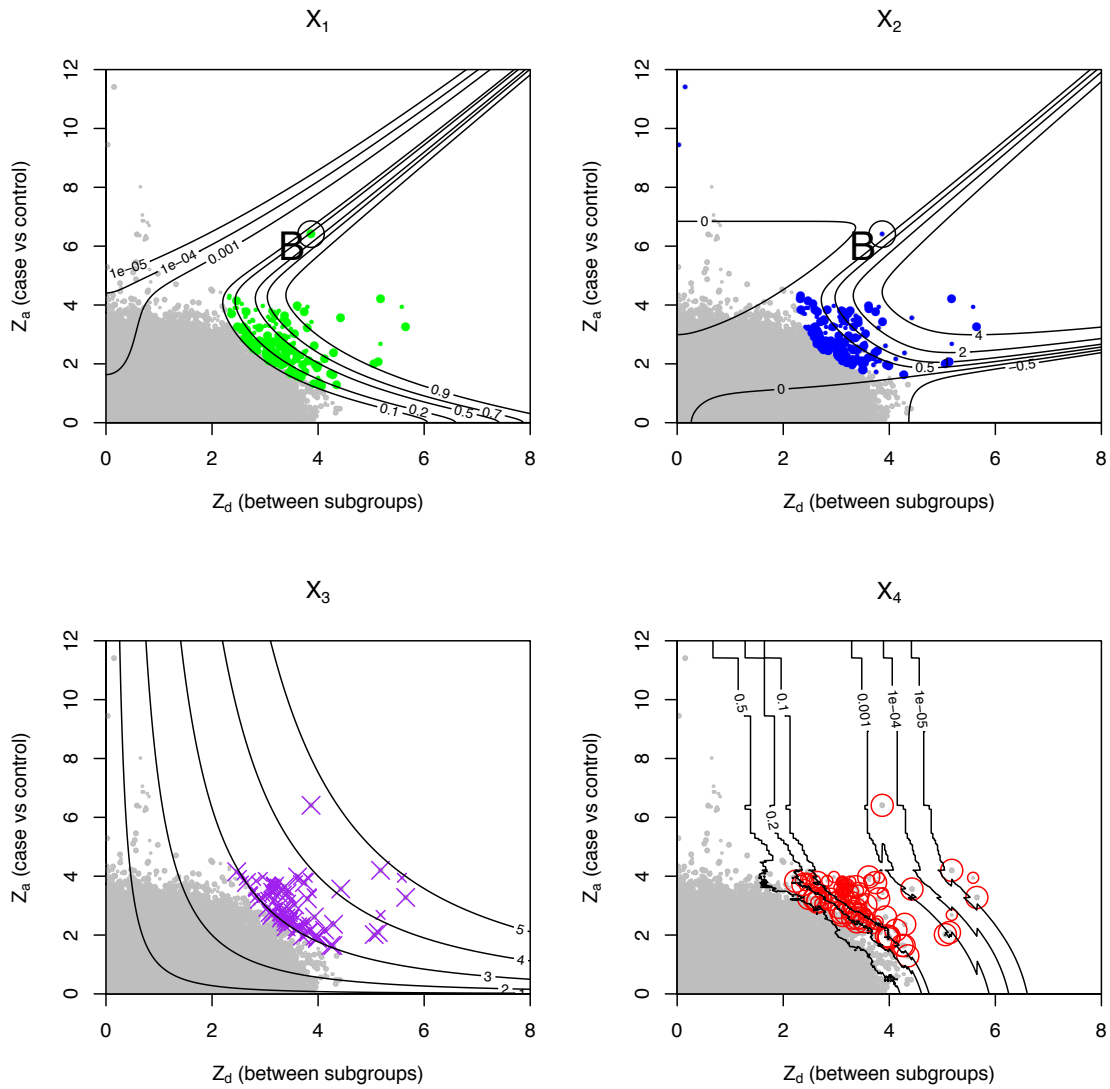

(b) T1D/T2D comparison

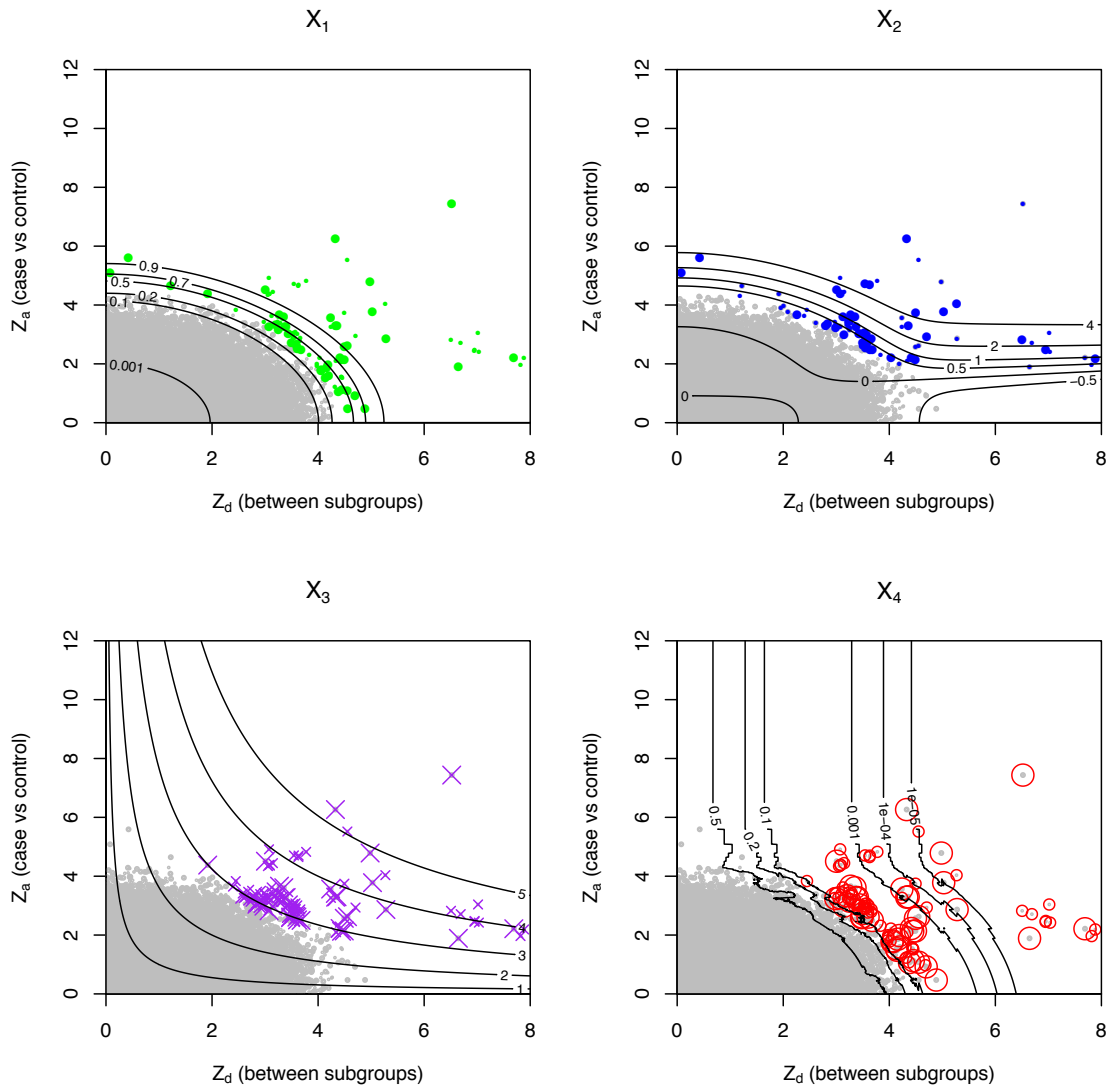

(c) T2D/RA comparison

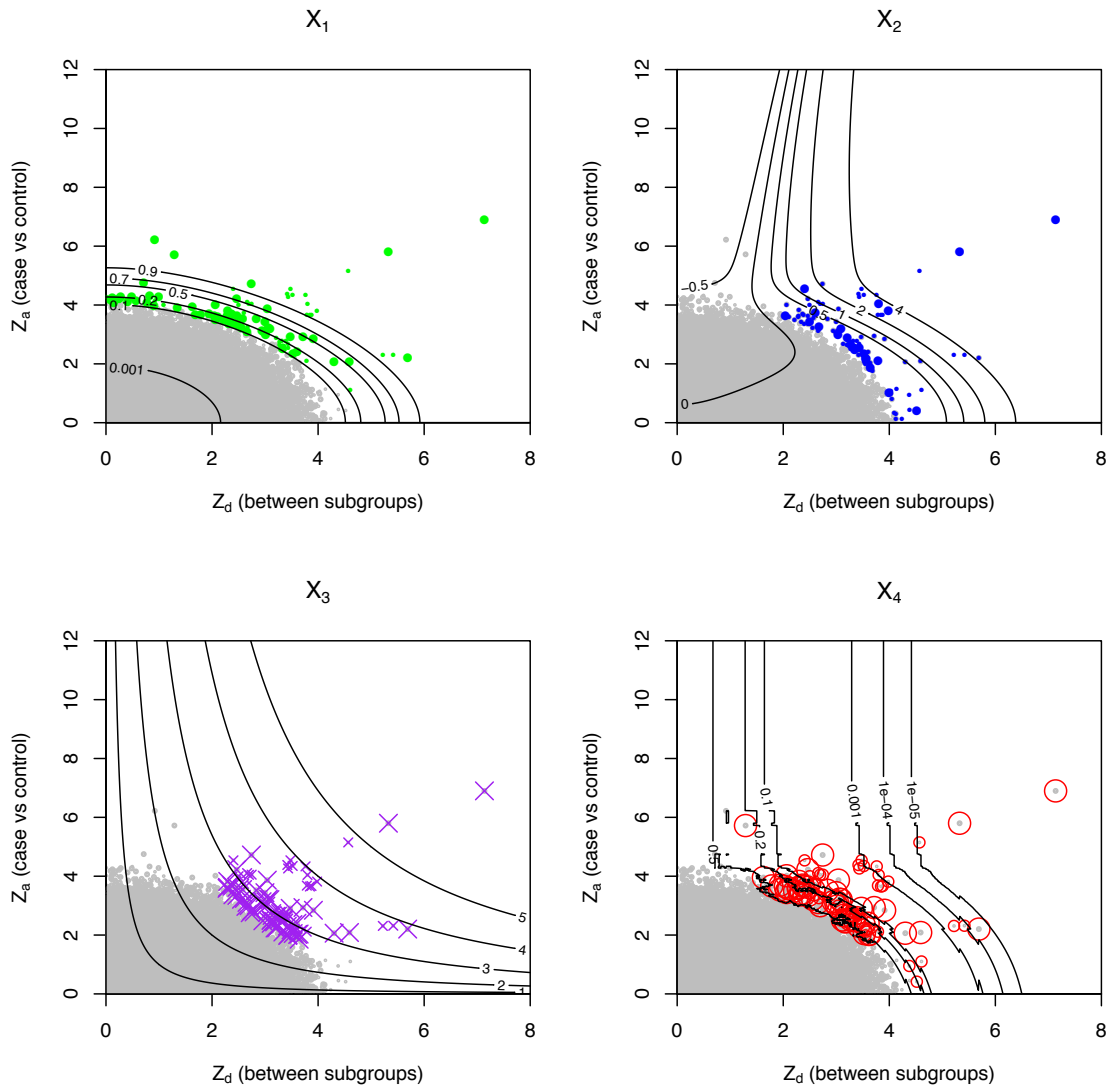

(d) GD/HT (ATD) comparison

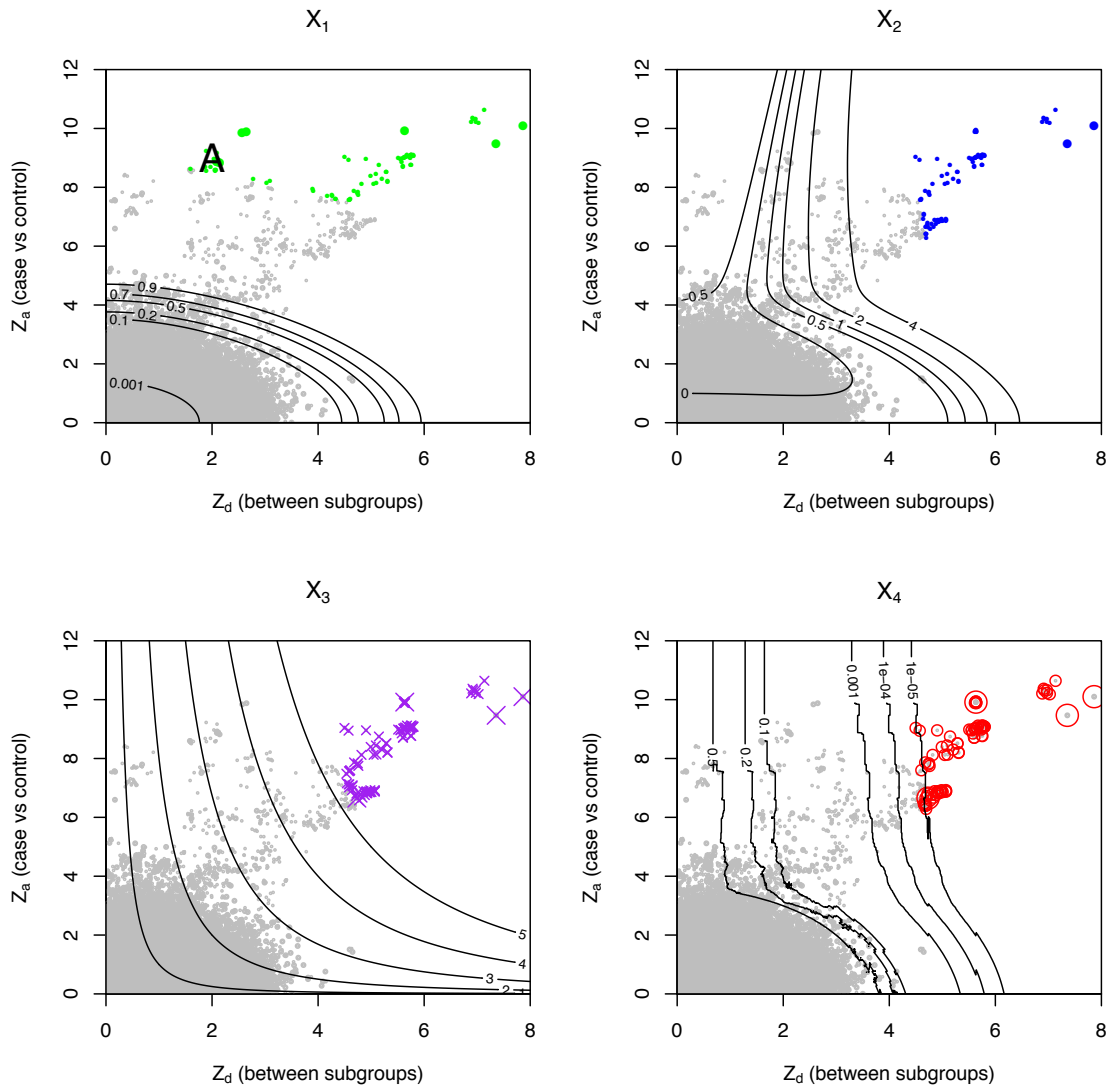

Supplementary Figure 7: We demonstrate all four test statistics for single-SNP effects in the comparisons between T1D/T2D/RA, and between GD and HT (preceding pages). The top 100 SNPs for each test statistic are highlighted, with larger symbols corresponding to SNPs with non-zero weights after applying LDAK [2]; that is, the SNPs which contributed to the model fit. Contours of each test statistic are shown in grey.

Differences are evident in the behaviour of the test statistics  $X_1$  and  $X_2$  between the two datasets;  $X_3$  and  $X_4$  are more robust. The different null hypotheses between  $X_3$  and  $X_4$  are responsible for the difference in shape near the line  $Z_a = 0$ . Contours of  $X_4$  are jagged due to the dependence of this statistic on the distribution of Z scores.

All methods primarily identified SNPs with both high  $|Z_a|$  and  $|Z_d|$  scores as contributors. As evident from the comparison between GH and HT, the statistic  $X_1$  is vulnerable to falsely declaring SNPs as subgroup-differentiating despite low  $|Z_d|$  scores (labeled 'A', top left panel, GD/HT). This arises due to the full model having a markedly higher value of  $\sigma_3$  than  $\sigma_2$ , leading to SNPs with very high  $|Z_a|$  values having a high posterior probability of category 3 membership.

This is partially able to be overcome by combining the test statistics  $X_1$  and  $X_2$  into one, which we typically do by only considering  $X_2$  scores in SNPs with  $X_1$  greater than some cutoff. However, this is not always effective, as is evident from the above figure for T1D/T2D. In this case, as discussed in the main paper, almost all SNPs with high  $Z_a$  also had high  $Z_d$ , meaning that the two distributions forming categories 2 and 3 under the null model were essentially the same. This led to the fitted parameters of the null model supporting SNPs falling into two distributions; one with identity covariance matrix, and the other with  $var(Z_d) > 1$ ,  $var(Z_a) = 1$  (see fitted parameters).

The different alternative hypothesis for  $X_4$  (different population MAFs in subgroups without requiring association with the phenotype overall) meant that SNPs with low  $|Z_a|$  scores may be identified by  $X_4$  in addition to those identified by  $X_1$ ,  $X_2$  and  $X_3$  (contour lines on bottom right panel, both figures). SNPs which are isolated may be missed by both  $X_1$  and  $X_2$  (label 'B', top two panels, T1D/RA), due to the fitted distribution of SNPs in category 3 tending to be driven by clusters of SNPs.

Given these results, we consider  $X_3$  and  $X_4$  to generally be the most appropriate measure for single SNP effects, although in appropriate circumstances  $X_2$  can be used alone or conditionally on  $X_1$ .

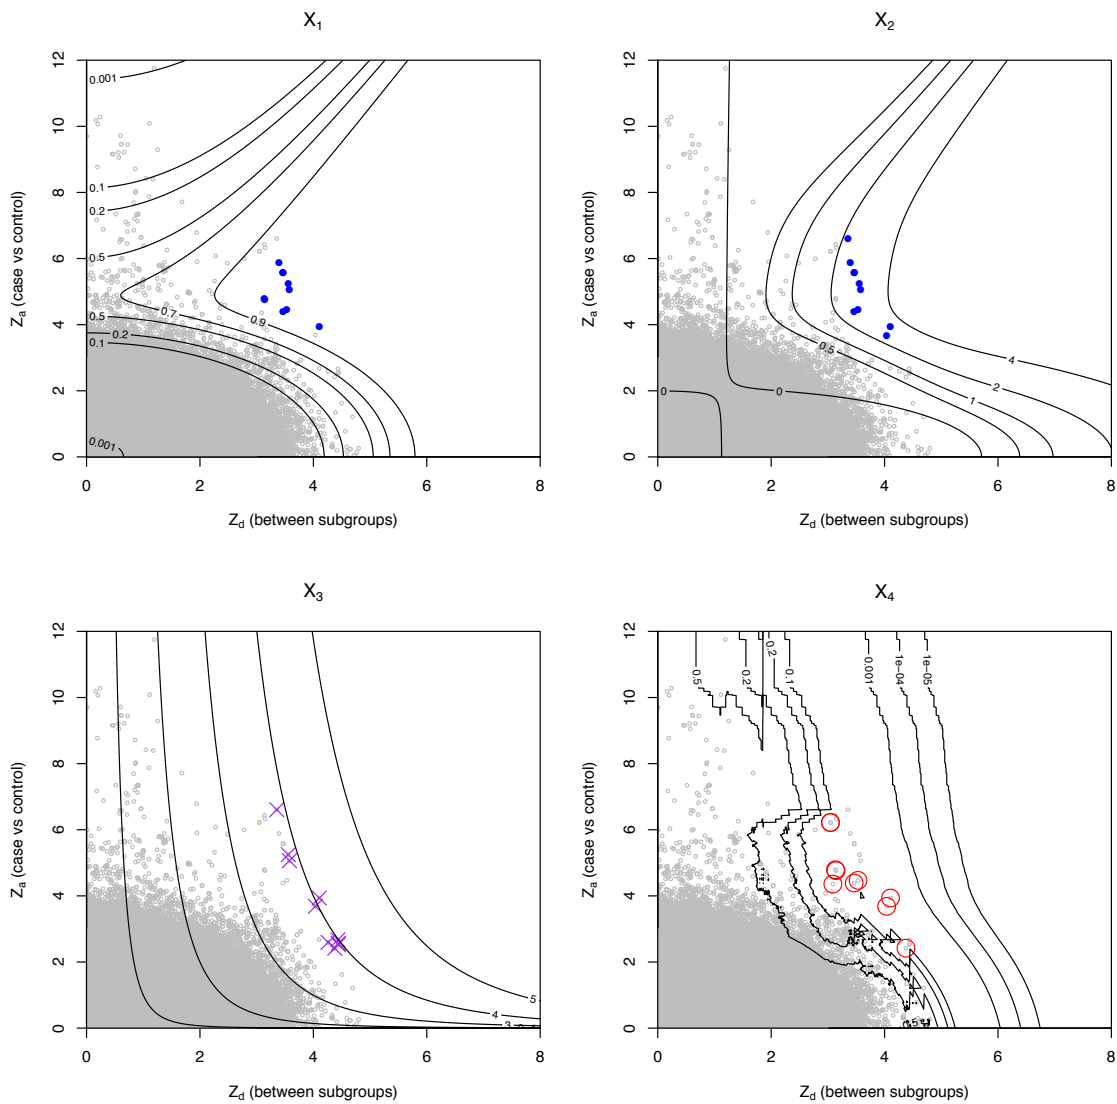

Supplementary Figure 8: We assessed the SNPs responsible for the observed difference in pseudo-likelihood ratio for our analysis of TPOAb positivity in T1D. SNPs in the MHC region were removed from the analysis (co-ordinates 25-38 Mb, GChR build 37). We combined  $X_1$  and  $X_2$  into a single test statistic, by only considering SNPs with  $X_1 > 0.7$  and then considering the top SNPs for  $X_2$ . The top ten SNPs for  $X_2|X_1 > 0.7$  (blue, top two panels),  $X_3$  (purple, bottom left panel), and  $X_4$  (red, bottom right panel) are shown. Contours of each summary statistic are shown as black lines. Details of SNPs are shown in the supplementary tables.

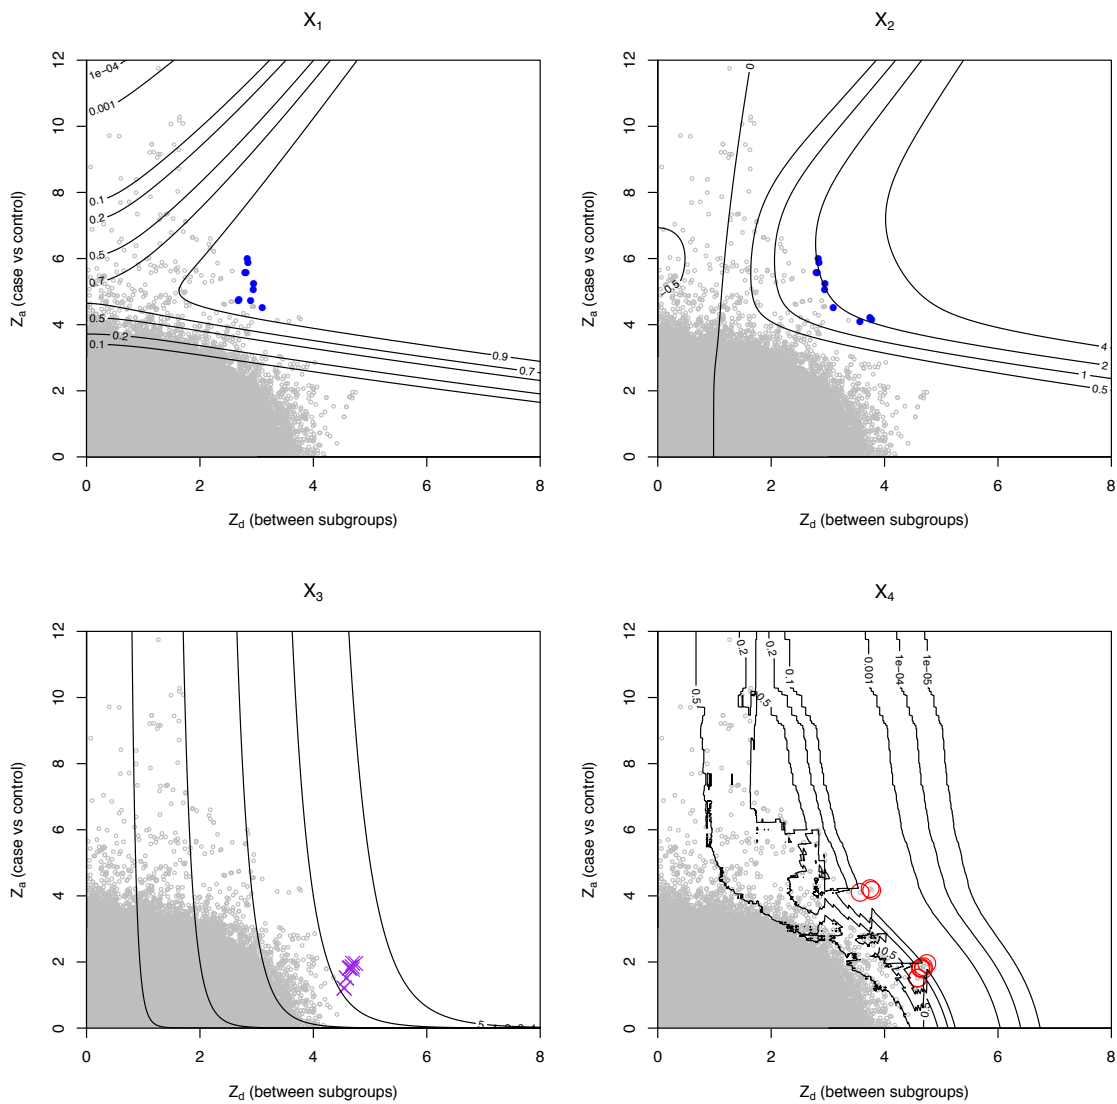

Supplementary Figure 9: We assessed the SNPs responsible for the observed difference in pseudo-likelihood ratio for our analysis of age at diagnosis in T1D. SNPs in the MHC region were removed from the analysis (co-ordinates 25-38 Mb, GChR build 37). We combined  $X_1$  and  $X_2$  into a single test statistic, by only considering SNPs with  $X_1 > 0.7$  and then considering the top SNPs for  $X_2$ . The top ten SNPs for  $X_2|X_1 > 0.7$  (blue, top two panels),  $X_3$  (purple, bottom left panel), and  $X_4$  (red, bottom right panel) are shown. Contours of each summary statistic are shown as black lines. Details of SNPs are shown in the supplementary tables.

## References

- [1] The Wellcome trust case control consortium (2007) Genome-wide association study of 14000 cases of seven common diseases and 3000 shared controls. *Nature* 447: 661-678.
- [2] Speed D, Hemani G, Johnson MR, Balding DJ (2012) Improved heritability estimation from genome-wide SNPs. *American Journal of Human Genetics* 91: 1011-1021.



A method for identifying genetic heterogeneity within  
phenotypically-defined disease subgroups

Supplementary Tables

James Liley, John A Todd and Chris Wallace

December 14, 2016

**List of Supplementary Tables**

|   |                                                                                 |    |
|---|---------------------------------------------------------------------------------|----|
| 1 | Forms of genetic architecture under different causes of heterogeneity . . . . . | 3  |
| 2 | Model parameters for autoantibody positivity in T1D . . . . .                   | 4  |
| 3 | Model parameters for age at diagnosis in T1D . . . . .                          | 4  |
| 4 | Top SNPs differentiating T1D and RA . . . . .                                   | 5  |
| 5 | Top SNPs differentiating T1D and T2D . . . . .                                  | 6  |
| 6 | Top SNPs differentiating T2D and RA . . . . .                                   | 7  |
| 7 | Top SNPs differentiating GD and HT subgroups of ATD. . . . .                    | 8  |
| 8 | Top SNPs for TPOAb positivity in T1D . . . . .                                  | 9  |
| 9 | Top SNPs for age at diagnosis in T1D . . . . .                                  | 10 |

| Form                                                                                | $r_g^{(1)}$ | $r_g^{(2)}$ | $\rho$  | $\tau$ | $\sigma_3$ | Phenomenon                                                                                                                                                                |
|-------------------------------------------------------------------------------------|-------------|-------------|---------|--------|------------|---------------------------------------------------------------------------------------------------------------------------------------------------------------------------|
| 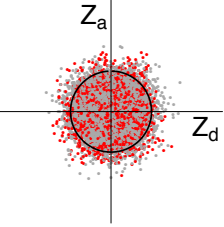   | 1           | 0           | 0       | $> 1$  | 1          | $H_0: Z_d, Z_a \sim N(0, I_2)$ ; all-environmental cause for subgroup phenotype                                                                                           |
|    | $\ll 1$     | 0           | 0       | $> 1$  | 1          | $H_0: Z_d, Z_a$ independent; subgrouping phenotype independent of main phenotype;                                                                                         |
|    | $1/ < 1$    | $\gg 0$     | $\gg 0$ | $> 1$  | $> 1$      | $H_1: Z_d, Z_a$ correlated; eg. same pathways; different heritability (age-of-onset)                                                                                      |
|   | $< 1$       | $> 0$       | $\gg 0$ | $> 1$  | $> 1$      | $H_1: Z_d, Z_a$ mostly correlated, some anticorrelation; eg. most variants associated with subgroup 1, some with subgroup 2                                               |
|  | $< 1$       | 0           | $\gg 0$ | $> 1$  | $> 1$      | $H_1: Z_d, Z_a$ both correlated and anticorrelated; eg. variants either associated only with subgroup 1 or only with subgroup 2                                           |
|  | $< 1$       | 0           | 0       | $> 1$  | $> 1$      | $H_1: var(Z_d) > 1$ and $var(Z_a) > 1$ but not correlated; general shared genetic architecture between subgrouping phenotype and main phenotype, effect sizes independent |

|                                                                                   |     |   |   |     |     |                                                                                                                                                   |
|-----------------------------------------------------------------------------------|-----|---|---|-----|-----|---------------------------------------------------------------------------------------------------------------------------------------------------|
| 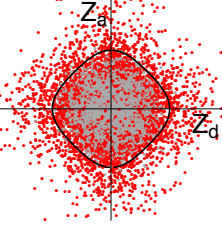 | < 1 | 0 | 0 | > 1 | > 1 | $H_1$ : shared genetic architecture between subgrouping phenotype and main phenotype, effect sizes dependent but not correlated or anticorrelated |
|-----------------------------------------------------------------------------------|-----|---|---|-----|-----|---------------------------------------------------------------------------------------------------------------------------------------------------|

Supplementary Table 1: Heterogeneity between case subgroups may arise in multiple ways, some of which are illustrated here. Plots show the distribution of  $Z_d$  and  $Z_a$  for SNPs in category 3 (those which differentiate subgroups). Column  $r_g^{(1)}$  corresponds to genetic correlation in method 1 (between  $Z$  scores for control vs subgroup 1 and control vs subgroup 2), and column  $r_g^{(2)}$  to genetic correlation in method 2 (between  $Z_a$  and  $Z_d$ ); see supplementary material, section 4. SNPs in category 1 (not differentiating cases/controls and not differentiating subgroups) are shown in grey for reference, and SNPs in category 2 are omitted. In the first two rows, the pathology leading to heterogeneity is genetically independent of the pathology leading to the main phenotype; our null hypothesis. The test  $r_g^{(1)} < 1$  will reject  $H_0$  for the scenario in row 2, as well as other scenarios. The test  $r_g^{(2)} \neq 0$  rejects  $H_0$  for the scenario in row 3, but is weakened in the scenario in row 4 due to the anticorrelation, and will not be able to reject  $H_0$  for rows 5-7. Since  $\rho$  detects correlation and anticorrelation simultaneously, it will additionally reject  $H_0$  for row 4 and will not be weakened in row 3. However, it is necessary to test for  $\sigma_3 > 1$  to reject  $H_0$  for rows 5 and 6.

| Model            |      | $\pi_1$ | $\pi_2$                | $\pi_3$                | $\sigma_2$ | $\sigma_3$ | $\tau$ | $\rho$ | p-value               |
|------------------|------|---------|------------------------|------------------------|------------|------------|--------|--------|-----------------------|
| TPO-Ab           | Full | 0.511   | 0.487                  | $2.407 \times 10^{-3}$ | 0.994      | 6.545      | 1.552  | 0.991  | $< 1 \times 10^{-20}$ |
|                  | Null | 0.987   | $2.333 \times 10^{-3}$ | 0.011                  | 6.634      | -          | 1.308  | -      |                       |
| TPO-Ab<br>no MHC | Full | 0.997   | $2.898 \times 10^{-4}$ | $3.031 \times 10^{-3}$ | 4.698      | 2.291      | 1.497  | 0.338  | $1.5 \times 10^{-4}$  |
|                  | Null | 0.989   | $1.882 \times 10^{-3}$ | $9.087 \times 10^{-3}$ | 3.11       | -          | 1.318  | -      |                       |
| GAD-Ab           | Full | 0.995   | $3.557 \times 10^{-3}$ | $1.057 \times 10^{-3}$ | 2.832      | 8.866      | 2.295  | 5.484  | $< 1 \times 10^{-20}$ |
|                  | Null | 0.997   | $2.328 \times 10^{-3}$ | $3.002 \times 10^{-4}$ | 6.639      | -          | 2.153  | -      |                       |
| GAD-Ab<br>no MHC | Full | 0.997   | $2.9 \times 10^{-3}$   | $3.434 \times 10^{-4}$ | 2.279      | 4.531      | 1.055  | 3.424  | 0.002                 |
|                  | Null | 0.792   | $1.883 \times 10^{-3}$ | 0.206                  | 3.111      | -          | 0.997  | -      |                       |
| IA2-Ab           | Full | 0.995   | $3.275 \times 10^{-3}$ | $1.244 \times 10^{-3}$ | 2.804      | 8.291      | 3.027  | 1.575  | $< 1 \times 10^{-20}$ |
|                  | Null | 0.997   | $2.287 \times 10^{-3}$ | $3.805 \times 10^{-4}$ | 6.674      | -          | 3.852  | -      |                       |
| IA2-Ab<br>no MHC | Full | 0.998   | $1.362 \times 10^{-3}$ | $7.904 \times 10^{-4}$ | 3.318      | 2.212      | 2.145  | 0      | 0.008                 |
|                  | Null | 0.998   | $1.88 \times 10^{-3}$  | $2.073 \times 10^{-4}$ | 3.112      | -          | 2.889  | -      |                       |
| PCA-Ab           | Full | 0.997   | $2.336 \times 10^{-3}$ | $3.413 \times 10^{-4}$ | 6.631      | 0.37       | 2.097  | 0.422  | $> 0.5$               |
|                  | Null | 0.998   | $2.335 \times 10^{-3}$ | $1.276 \times 10^{-4}$ | 6.632      | -          | 2.54   | -      |                       |
| PCA-Ab<br>no MHC | Full | 0.997   | $2.759 \times 10^{-3}$ | $1.303 \times 10^{-4}$ | 2.508      | 5.58       | 2.256  | 0      | $> 0.5$               |
|                  | Null | 0.998   | $1.884 \times 10^{-3}$ | $1.384 \times 10^{-4}$ | 3.111      | -          | 2.5    | -      |                       |

Supplementary Table 2: Parameters of models fitted to T1D autoantibody positivity data. With MHC retained (coordinates 25-38 Mb, GChR build 37) all full models fit better than null models with the exception of those fitted to PCA-Ab positivity. With MHC removed, effect sizes were lower, but the null hypothesis could be rejected for TPOA-Ab positivity, with weaker evidence for rejecting the null hypothesis for GAD-Ab and IA2-Ab. In most cases, there was evidence of SNPs differentiating subgroups (typically, fitted  $\tau > 1$ ). There were generally a small number of SNPs which strongly differentiated cases and controls (a small value of  $\pi_2$ ,  $\pi_3$  corresponding to the larger value of  $\sigma_2$ ,  $\sigma_3$ ). P-values were computed against the null distribution of cPLR for random subgroups, which showed good agreement with the asymptotic mixture- $\chi^2$  distribution (see supplementary figure 4c). P-values shown are unadjusted for multiple testing.

|               |      |       |                        |                        |       |       |       |       |                       |
|---------------|------|-------|------------------------|------------------------|-------|-------|-------|-------|-----------------------|
| Age           | Full | 0.898 | 0.099                  | $2.4 \times 10^{-3}$   | 0.96  | 6.558 | 1.601 | 3.644 | $4.9 \times 10^{-37}$ |
|               | Null | 0.885 | $2.338 \times 10^{-3}$ | 0.113                  | 6.631 | -     | 0.945 | -     |                       |
| Age<br>no MHC | Full | 0.997 | $1.881 \times 10^{-4}$ | $3.035 \times 10^{-3}$ | 5.257 | 2.372 | 1.159 | 1.315 | 0.007                 |
|               | Null | 0.782 | $1.891 \times 10^{-3}$ | 0.216                  | 3.107 | -     | 0.97  | -     |                       |

Supplementary Table 3: Parameters of models fitted to age at diagnosis in T1D, considered as a parameter rather than defining subgroups. The full model fit significantly better than the null model when the MHC region was included or excluded. Plotted  $Z_a$  and  $Z_d$  scores are shown in supplementary figure 6. The fitted models show evidence of SNPs associated with age at diagnosis (fitted  $\tau > 1$ ). P-values were computed against the null distribution of cPLR for random subgroups, which showed good agreement with the asymptotic mixture- $\chi^2$  distribution (see supplementary figure 4c).

| SNP details |     |           | Z scores      |                                | Values (rank) |       |            |            | Summary statistics         |                        |                        |
|-------------|-----|-----------|---------------|--------------------------------|---------------|-------|------------|------------|----------------------------|------------------------|------------------------|
| SNP         | Chr | Pos       | Gene          | $ Z_d  (p)$                    | $ Z_a $       | $X_1$ | $X_2$      | $X_3$      | $X_4$                      | p-val ( $X_3$ )        | FDR ( $X_4$ )          |
| rs12045559  | 1   | 113708908 | <i>PTPN22</i> | 2.892 ( $3.8 \times 10^{-3}$ ) | 3.217         | 0.332 | 0.383      | 3.003      | 0.061 (15)                 | $5.593 \times 10^{-5}$ | 0.169                  |
| rs415024    | 5   | 9445358   |               | 3.051 ( $2.3 \times 10^{-3}$ ) | 2.941         | 0.344 | 0.394      | 3.012      | 0.083 (20)                 | $5.415 \times 10^{-5}$ | 0.247                  |
| rs1010599   | 5   | 35944231  | <i>IL7R</i>   | 3.367 ( $7.6 \times 10^{-4}$ ) | 2.881         | 0.538 | 0.72 (15)  | 3.186 (16) | 0.078 (18)                 | $2.092 \times 10^{-5}$ | 0.23                   |
| rs4024109   | 5   | 35955375  | <i>IL7R</i>   | 3.307 ( $9.4 \times 10^{-4}$ ) | 2.792         | 0.456 | 0.561 (18) | 3.115 (19) | 0.107                      | $3.072 \times 10^{-5}$ | 0.357                  |
| rs17085170  | 5   | 95198087  |               | 4.291 ( $1.8 \times 10^{-5}$ ) | 2.365         | 0.832 | 1.353 (9)  | 3.477 (10) | 0.022 (12)                 | $4.695 \times 10^{-6}$ | 0.046                  |
| rs3114834   | 7   | 109192112 |               | 2.649 ( $8.1 \times 10^{-3}$ ) | 3.787         | 0.308 | 0.351      | 3.005      | 0.072 (17)                 | $5.504 \times 10^{-5}$ | 0.213                  |
| rs12549890  | 8   | 21045174  |               | 3.535 ( $4.1 \times 10^{-4}$ ) | 2.459         | 0.449 | 0.519 (19) | 3.11 (20)  | 0.141                      | $3.154 \times 10^{-5}$ | 0.48                   |
| rs16874205  | 8   | 107271324 |               | 4.428 ( $9.5 \times 10^{-6}$ ) | 3.565         | 0.994 | 4.48 (3)   | 4.102 (4)  | $6.669 \times 10^{-4}$ (3) | $2.768 \times 10^{-7}$ | $3.612 \times 10^{-3}$ |
| rs4076319   | 10  | 85129122  |               | 4.124 ( $3.7 \times 10^{-5}$ ) | 2.165         | 0.656 | 0.773 (14) | 3.285 (15) | 0.066 (16)                 | $1.269 \times 10^{-5}$ | 0.186                  |
| rs10736277  | 10  | 121705898 |               | 3.415 ( $6.4 \times 10^{-4}$ ) | 3.411         | 0.775 | 1.434 (8)  | 3.413 (12) | 0.021 (11)                 | $6.581 \times 10^{-6}$ | 0.045                  |
| rs7912574   | 10  | 121717404 |               | 3.265 ( $1.1 \times 10^{-3}$ ) | 2.957         | 0.499 | 0.648 (16) | 3.153 (17) | 0.084                      | $2.528 \times 10^{-5}$ | 0.25                   |
| rs2065660   | 10  | 121754185 |               | 3.557 ( $3.8 \times 10^{-4}$ ) | 3.031         | 0.73  | 1.23 (11)  | 3.361 (14) | 0.036 (13)                 | $8.529 \times 10^{-6}$ | 0.091                  |
| rs6578252   | 11  | 2226817   | <i>INS</i>    | 3.481 ( $5 \times 10^{-4}$ )   | 2.576         | 0.473 | 0.572 (17) | 3.13 (18)  | 0.113                      | $2.87 \times 10^{-5}$  | 0.374                  |
| rs705698    | 12  | 54670954  | <i>IKZF4</i>  | 5.058 ( $4.2 \times 10^{-7}$ ) | 2.016         | 0.934 | 0.871 (13) | 3.656 (8)  | $1.241 \times 10^{-3}$ (6) | $2.016 \times 10^{-6}$ | $6.997 \times 10^{-3}$ |
| rs705702    | 12  | 54676903  | <i>IKZF4</i>  | 5.135 ( $2.8 \times 10^{-7}$ ) | 2.086         | 0.956 | 1.067 (12) | 3.737 (6)  | $8.403 \times 10^{-4}$ (4) | $1.371 \times 10^{-6}$ | $4.78 \times 10^{-3}$  |
| rs2292239   | 12  | 54768447  | <i>IKZF4</i>  | 5.651 ( $1.6 \times 10^{-8}$ ) | 3.278         | 1     | 4.991 (2)  | 4.663 (2)  | $8.184 \times 10^{-6}$ (1) | $2.35 \times 10^{-8}$  | $2.586 \times 10^{-5}$ |
| rs4766443   | 12  | 109864518 |               | 3.372 ( $7.5 \times 10^{-4}$ ) | 3.644         | 0.813 | 1.623 (7)  | 3.466 (11) | 0.016 (10)                 | $5.058 \times 10^{-6}$ | 0.069                  |
| rs10774613  | 12  | 110008885 | <i>SH2B3</i>  | 3.929 ( $8.5 \times 10^{-5}$ ) | 2.614         | 0.769 | 1.279 (10) | 3.403 (13) | 0.055 (14)                 | $6.902 \times 10^{-6}$ | 0.152                  |
| rs1265566   | 12  | 110179096 | <i>SH2B3</i>  | 3.612 ( $3 \times 10^{-4}$ )   | 3.975         | 0.942 | 2.764 (5)  | 3.736 (7)  | $6.384 \times 10^{-3}$ (8) | $1.373 \times 10^{-6}$ | 0.027                  |
| rs17696736  | 12  | 110949538 | <i>SH2B3</i>  | 3.867 ( $1.1 \times 10^{-4}$ ) | 6.409         | 0.237 | 0.256      | 4.622 (3)  | $9.922 \times 10^{-4}$ (5) | $2.823 \times 10^{-8}$ | $5.809 \times 10^{-3}$ |
| rs16961362  | 15  | 33731898  |               | 3.799 ( $1.5 \times 10^{-4}$ ) | 3.23          | 0.896 | 2.123 (6)  | 3.588 (9)  | 0.011 (9)                  | $2.769 \times 10^{-6}$ | 0.052                  |
| rs1711029   | 15  | 51491702  |               | 5.178 ( $2.2 \times 10^{-7}$ ) | 4.201         | 1     | 7.503 (1)  | 4.809 (1)  | $8.759 \times 10^{-6}$ (2) | $1.187 \times 10^{-8}$ | $2.748 \times 10^{-5}$ |
| rs12924729  | 16  | 11095284  | <i>DEXI</i>   | 3.741 ( $1.8 \times 10^{-4}$ ) | 3.784         | 0.952 | 2.92 (4)   | 3.756 (5)  | $3.989 \times 10^{-3}$ (7) | $1.278 \times 10^{-6}$ | 0.015                  |
| rs1942707   | 18  | 60768535  |               | 4.279 ( $1.9 \times 10^{-5}$ ) | 1.642         | 0.411 | 0.108      | 3.052      | 0.083 (19)                 | $4.376 \times 10^{-5}$ | 0.247                  |

Supplementary Table 4: Top 20 SNPs differentiating T1D and RA (MHC removed), considered as subgroups of a general autoimmune phenotype, for each of four summary statistics. Positions are in NCBI build 36. Because of the large number of SNPs with evidence for differentiating the subgroups, only SNPs with non-zero weights after applying the LDAK procedure are included in this table. Ranks in  $X_2$  (bracketed) are only amongst SNPs with  $X_1 > 0.7$ ; ranks in  $X_3$  and  $X_4$  are amongst all SNPs. The value  $X_1$  is the posterior probability of category 3 membership (SNPs differentiating subgroups);  $X_2$  is the contribution to the pseudo-likelihood ratio from the SNP;  $X_3$  is a weighted geometric mean of  $Z_a$  and  $Z_d$  and  $X_4$  is the conditional false discovery rate for observations  $z_a$  and  $z_d$  at the SNP; that is,  $Pr(H_0' || Z_d| \leq |z_d|, |Z_a| \leq |z_a|)$ , where  $H_0'$  is the hypothesis that the SNP has the same population minor allele frequencies in subgroups. P-values are computed based on  $X_3$ , under the null hypothesis that  $(Z_a, Z_d)$  has a joint mixture bivariate Gaussian distribution consistent with  $H_0$ . A value  $X_4 = \alpha$  does not correspond to a false-discovery rate of  $\alpha$  amongst SNPs with  $X_4 \leq \alpha$ ; the corresponding value,  $P(H_0' | X_4 < \alpha)$  is given in the rightmost column. Potential gene associations are marked.

| SNP details |     |           | Z scores       |                                  | Values (rank) |       |            |            | Summary statistics            |                           |                           |
|-------------|-----|-----------|----------------|----------------------------------|---------------|-------|------------|------------|-------------------------------|---------------------------|---------------------------|
| SNP         | Chr | Pos       | Gene           | $ Z_d (p)$                       | $ Z_a $       | $X_1$ | $X_2$      | $X_3$      | $X_4$                         | p-val ( $X_3$ )           | FDR ( $X_4$ )             |
| rs17013326  | 1   | 113801358 | <i>PTPN22</i>  | 3.007 (2.6 × 10 <sup>-3</sup> )  | 4.509         | 0.957 | 3.169 (7)  | 3.741 (9)  | 3.431 × 10 <sup>-3</sup> (13) | 9.501 × 10 <sup>-7</sup>  | 0.026                     |
| rs12306666  | 1   | 113885452 | <i>PTPN22</i>  | 4.327 (1.5 × 10 <sup>-5</sup> )  | 6.265         | 1     | 14.651 (2) | 5.283 (2)  | 1.512 × 10 <sup>-5</sup> (6)  | 9.121 × 10 <sup>-10</sup> | 8.1 × 10 <sup>-5</sup>    |
| rs6679677   | 1   | 114015850 | <i>PTPN22</i>  | 6.52 (7 × 10 <sup>-11</sup> )    | 7.437         | 1     | 22.963 (1) | 6.999 (1)  | 7.052 × 10 <sup>-11</sup> (1) | 3.583 × 10 <sup>-14</sup> | 2.658 × 10 <sup>-10</sup> |
| rs6661817   | 1   | 114159076 | <i>PTPN22</i>  | 3.372 (7.5 × 10 <sup>-4</sup> )  | 3.26          | 0.573 | 0.801      | 3.311 (17) | 0.021                         | 7.411 × 10 <sup>-6</sup>  | 0.128                     |
| rs3811019   | 1   | 114183625 | <i>PTPN22</i>  | 3.353 (8 × 10 <sup>-4</sup> )    | 3.609         | 0.768 | 1.413 (14) | 3.489 (11) | 9.448 × 10 <sup>-3</sup> (17) | 3.046 × 10 <sup>-6</sup>  | 0.057                     |
| rs12061474  | 1   | 201120971 | <i>PIK3C2B</i> | 3.252 (1.1 × 10 <sup>-3</sup> )  | 3.153         | 0.422 | 0.511      | 3.198 (20) | 0.036                         | 1.366 × 10 <sup>-5</sup>  | 0.234                     |
| rs903228    | 2   | 53603700  |                | 0.077 (0.94)                     | 5.085         | 0.726 | 1.425 (13) | 0.738      | ≥ 0.5                         | 0.372                     | ≥ 0.5                     |
| rs7666328   | 4   | 116140909 |                | 0.425 (0.67)                     | 5.593         | 0.954 | 3.307 (6)  | 1.706      | ≥ 0.5                         | 0.021                     | ≥ 0.5                     |
| rs2544677   | 5   | 86435018  |                | 3.272 (1.1 × 10 <sup>-3</sup> )  | 3.661         | 0.753 | 1.36 (15)  | 3.476 (12) | 9.796 × 10 <sup>-3</sup> (18) | 3.278 × 10 <sup>-6</sup>  | 0.059                     |
| rs2112168   | 5   | 86440646  |                | 3.199 (1.4 × 10 <sup>-3</sup> )  | 3.335         | 0.503 | 0.664      | 3.272 (18) | 0.03                          | 9.241 × 10 <sup>-6</sup>  | 0.192                     |
| rs7917983   | 10  | 114722872 | <i>TCF7L2</i>  | 4.357 (1.3 × 10 <sup>-5</sup> )  | 3.303         | 0.973 | 2.988 (8)  | 3.752 (8)  | 8.059 × 10 <sup>-4</sup> (9)  | 9.129 × 10 <sup>-7</sup>  | 5.483 × 10 <sup>-3</sup>  |
| rs7901275   | 10  | 114722896 | <i>TCF7L2</i>  | 4.331 (1.5 × 10 <sup>-5</sup> )  | 3.287         | 0.969 | 2.895 (9)  | 3.732 (10) | 8.347 × 10 <sup>-4</sup> (10) | 9.996 × 10 <sup>-7</sup>  | 5.325 × 10 <sup>-3</sup>  |
| rs7901695   | 10  | 114744078 | <i>TCF7L2</i>  | 7.691 (1.5 × 10 <sup>-14</sup> ) | 2.215         | 1     | 1 (16)     | 3.93 (5)   | 1.566 × 10 <sup>-10</sup> (2) | 4.229 × 10 <sup>-7</sup>  | 5.471 × 10 <sup>-10</sup> |
| rs12243326  | 10  | 114778805 | <i>TCF7L2</i>  | 6.645 (3 × 10 <sup>-11</sup> )   | 1.889         | 1     | 0.447 (20) | 3.372 (14) | 7.82 × 10 <sup>-8</sup> (3)   | 5.464 × 10 <sup>-6</sup>  | 3.365 × 10 <sup>-7</sup>  |
| rs3741939   | 12  | 3517792   |                | 4.885 (1 × 10 <sup>-6</sup> )    | 0.473         | 0.713 | 0          | 1.386      | 0.016 (19)                    | 0.066                     | 0.096                     |
| rs705698    | 12  | 54670954  | <i>IKZF4</i>   | 4.494 (7 × 10 <sup>-6</sup> )    | 2.569         | 0.907 | 1.492 (12) | 3.324 (16) | 2.223 × 10 <sup>-3</sup> (12) | 7.058 × 10 <sup>-6</sup>  | 0.016                     |
| rs705702    | 12  | 54676903  | <i>IKZF4</i>   | 4.554 (5.3 × 10 <sup>-6</sup> )  | 2.624         | 0.932 | 1.673 (11) | 3.383 (13) | 1.886 × 10 <sup>-3</sup> (11) | 5.177 × 10 <sup>-6</sup>  | 0.013                     |
| rs2292239   | 12  | 54768447  | <i>IKZF4</i>   | 5.026 (5 × 10 <sup>-7</sup> )    | 3.78          | 1     | 5.14 (4)   | 4.31 (4)   | 1.186 × 10 <sup>-5</sup> (5)  | 8.463 × 10 <sup>-8</sup>  | 6.252 × 10 <sup>-5</sup>  |
| rs4766443   | 12  | 109864518 | <i>SH2B3</i>   | 3.44 (5.8 × 10 <sup>-4</sup> )   | 3.025         | 0.474 | 0.586      | 3.21 (19)  | 0.032                         | 1.264 × 10 <sup>-5</sup>  | 0.208                     |
| rs10774613  | 12  | 110008885 | <i>SH2B3</i>   | 4.415 (1 × 10 <sup>-5</sup> )    | 2.223         | 0.783 | 0.804 (17) | 3.049      | 6.221 × 10 <sup>-3</sup> (16) | 3.07 × 10 <sup>-5</sup>   | 0.042                     |
| rs1265566   | 12  | 110179096 | <i>SH2B3</i>   | 3.398 (6.8 × 10 <sup>-4</sup> )  | 3.276         | 0.601 | 0.867      | 3.332 (15) | 0.021                         | 6.733 × 10 <sup>-6</sup>  | 0.126                     |
| rs17696736  | 12  | 110949538 | <i>SH2B3</i>   | 4.981 (6.3 × 10 <sup>-7</sup> )  | 4.788         | 1     | 8.774 (3)  | 4.876 (3)  | 2.532 × 10 <sup>-6</sup> (4)  | 6.675 × 10 <sup>-9</sup>  | 1.263 × 10 <sup>-5</sup>  |
| rs12924729  | 16  | 11095284  | <i>SH2B3</i>   | 4.236 (2.3 × 10 <sup>-5</sup> )  | 3.563         | 0.98  | 3.46 (5)   | 3.859 (6)  | 4.771 × 10 <sup>-4</sup> (8)  | 5.72 × 10 <sup>-7</sup>   | 3.029 × 10 <sup>-3</sup>  |
| rs7193144   | 16  | 52368187  | <i>FTO</i>     | 4.493 (7 × 10 <sup>-6</sup> )    | 2.139         | 0.803 | 0.747 (18) | 3.011      | 4.761 × 10 <sup>-3</sup> (14) | 3.735 × 10 <sup>-5</sup>  | 0.033                     |
| rs8050136   | 16  | 52373776  | <i>FTO</i>     | 4.442 (8.9 × 10 <sup>-6</sup> )  | 2.127         | 0.768 | 0.689 (19) | 2.986      | 5.919 × 10 <sup>-3</sup> (15) | 4.257 × 10 <sup>-5</sup>  | 0.041                     |
| rs9926289   | 16  | 52378004  | <i>FTO</i>     | 4.19 (2.8 × 10 <sup>-5</sup> )   | 1.985         | 0.519 | 0.337      | 2.8        | 0.018 (20)                    | 1.203 × 10 <sup>-4</sup>  | 0.109                     |
| rs2542151   | 18  | 12769947  | <i>PTPN2</i>   | 5.278 (1.3 × 10 <sup>-7</sup> )  | 2.866         | 0.998 | 2.619 (10) | 3.797 (7)  | 7.514 × 10 <sup>-5</sup> (7)  | 7.456 × 10 <sup>-7</sup>  | 4.5 × 10 <sup>-4</sup>    |

Supplementary Table 5: Top 20 SNPs differentiating T1D and T2D (MHC removed), considered as subgroups of a general diabetic phenotype, for each of four summary statistics. Positions are in NCBI build 36. Because of the large number of SNPs with evidence for differentiating the subgroups, only SNPs with non-zero weights after applying the LDAK procedure are included in this table. Ranks in  $X_2$  (bracketed) are only amongst SNPs with  $X_1 > 0.7$ ; ranks in  $X_3$  and  $X_4$  are amongst all SNPs. The value  $X_1$  is the posterior probability of category 3 membership (SNPs differentiating subgroups);  $X_2$  is the contribution to the pseudo-likelihood ratio from the SNP;  $X_3$  is a weighted geometric mean of  $Z_a$  and  $Z_d$  is the conditional false discovery rate for observations  $z_a$  and  $z_d$  at the SNP; that is,  $Pr(H'_0 || Z_d| \leq |z_d|, |Z_a| \leq |z_a|)$ , where  $H'_0$  is the hypothesis that the SNP has the same population minor allele frequencies in subgroups. P-values are computed based on  $X_3$ , under the null hypothesis that  $(Z_a, Z_d)$  has a joint mixture bivariate Gaussian distribution consistent with  $H_0$ . A value  $X_4 = \alpha$  does not correspond to a false-discovery rate of  $\alpha$  amongst SNPs with  $X_4 \leq \alpha$ ; the corresponding value,  $P(H'_0 | X_4 \leq \alpha)$  is given in the rightmost column. Potential gene associations are marked.

| SNP details |     |           | Z scores       |                                 | Values (rank) |       |            |            | Summary statistics          |                         |                         |
|-------------|-----|-----------|----------------|---------------------------------|---------------|-------|------------|------------|-----------------------------|-------------------------|-------------------------|
| SNP         | Chr | Pos       | Gene           | $ Z_d (p)$                      | $ Z_a $       | $X_1$ | $X_2$      | $X_3$      | $X_4$                       | p-val ( $X_3$ )         | FDR ( $X_4$ )           |
| rs10858002  | 1   | 113794974 | <i>PTPN22</i>  | 2.997 ( $2.7 \times 10^{-3}$ )  | 3.44          | 0.413 | 0.472 (11) | 3.171 (11) | 0.042 (11)                  | $1.492 \times 10^{-5}$  | 0.27                    |
| rs17013326  | 1   | 113801358 | <i>PTPN22</i>  | 2.465 (0.01)                    | 4.223         | 0.743 | 0.933 (6)  | 3.072 (15) | 0.029 (8)                   | $2.656 \times 10^{-5}$  | 0.172                   |
| rs1230666   | 1   | 113885452 | <i>PTPN22</i>  | 5.326 ( $1 \times 10^{-7}$ )    | 5.801         | 1     | 10.802 (2) | 5.515 (2)  | $1.508 \times 10^{-7}$ (2)  | $6.511 \times 10^{-11}$ | $1.391 \times 10^{-6}$  |
| rs6679677   | 1   | 114015850 | <i>PTPN22</i>  | 7.137 ( $9.5 \times 10^{-13}$ ) | 6.9           | 1     | 19.721 (1) | 7.039 (1)  | $9.563 \times 10^{-13}$ (1) | $3.084 \times 10^{-15}$ | $8.924 \times 10^{-12}$ |
| rs3811019   | 1   | 114183625 | <i>PTPN22</i>  | 2.943 ( $3.3 \times 10^{-3}$ )  | 3.132         | 0.207 | 0.199      | 3.019 (19) | 0.11                        | $3.64 \times 10^{-5}$   | $\geq 0.5$              |
| rs10931347  | 2   | 189007813 |                | 3.014 ( $2.6 \times 10^{-3}$ )  | 2.984         | 0.17  | 0.163      | 3.002 (20) | 0.14                        | $3.952 \times 10^{-5}$  | $\geq 0.5$              |
| rs6846031   | 4   | 178394297 |                | 3.474 ( $5.1 \times 10^{-4}$ )  | 2.908         | 0.324 | 0.379 (13) | 3.23 (9)   | 0.053 (12)                  | $1.041 \times 10^{-5}$  | 0.326                   |
| rs11970411  | 6   | 138220854 | <i>TNFAIP3</i> | 3.601 ( $3.2 \times 10^{-4}$ )  | 2.402         | 0.161 | 0.181      | 3.052 (17) | 0.162                       | $2.948 \times 10^{-5}$  | $\geq 0.5$              |
| rs3114834   | 7   | 109192112 |                | 3.092 ( $2 \times 10^{-3}$ )    | 3.204         | 0.305 | 0.328 (14) | 3.137 (12) | 0.07 (14)                   | $1.822 \times 10^{-5}$  | 0.452                   |
| rs16874205  | 8   | 107271324 |                | 3.042 ( $2.4 \times 10^{-3}$ )  | 3.866         | 0.748 | 1.213 (5)  | 3.355 (7)  | 0.013 (6)                   | $5.053 \times 10^{-6}$  | 0.077                   |
| rs2104286   | 10  | 6139051   | <i>IL2RA</i>   | 3.911 ( $9.2 \times 10^{-5}$ )  | 2.842         | 0.554 | 0.804 (8)  | 3.433 (4)  | 0.03 (9)                    | $3.19 \times 10^{-6}$   | 0.185                   |
| rs7917983   | 10  | 114722872 | <i>TCF7L2</i>  | 2.296 (0.02)                    | 3.823         | 0.356 | 0.283 (16) | 2.828      | 0.08 (16)                   | $1.079 \times 10^{-4}$  | 0.478                   |
| rs7901275   | 10  | 114722896 | <i>TCF7L2</i>  | 2.064 (0.04)                    | 4.016         | 0.407 | 0.268 (17) | 2.709      | 0.093                       | $2.092 \times 10^{-4}$  | $\geq 0.5$              |
| rs7901695   | 10  | 114744078 | <i>TCF7L2</i>  | 5.689 ( $1.3 \times 10^{-8}$ )  | 2.203         | 0.987 | 4.345 (3)  | 3.861 (3)  | $6.625 \times 10^{-5}$ (3)  | $3.159 \times 10^{-7}$  | $5.521 \times 10^{-4}$  |
| rs12243326  | 10  | 114778805 | <i>TCF7L2</i>  | 4.592 ( $4.4 \times 10^{-6}$ )  | 2.087         | 0.587 | 0.912 (7)  | 3.326 (8)  | 0.01 (4)                    | $6.013 \times 10^{-6}$  | 0.056                   |
| rs10736277  | 10  | 121705898 | <i>TCF7L2</i>  | 2.992 ( $2.8 \times 10^{-3}$ )  | 3.064         | 0.194 | 0.188      | 3.021 (18) | 0.113                       | $3.562 \times 10^{-5}$  | $\geq 0.5$              |
| rs770738    | 12  | 10034164  | <i>DEX1</i>    | 2.364 (0.02)                    | 3.698         | 0.298 | 0.236      | 2.838      | 0.084 (19)                  | $1.021 \times 10^{-4}$  | 0.478                   |
| rs1495377   | 12  | 69863368  | <i>TSPAN8</i>  | 4.302 ( $1.7 \times 10^{-5}$ )  | 2.063         | 0.369 | 0.483 (10) | 3.186 (10) | 0.032 (10)                  | $1.37 \times 10^{-5}$   | 0.197                   |
| rs7961581   | 12  | 69949369  | <i>TSPAN8</i>  | 3.715 ( $2 \times 10^{-4}$ )    | 2.935         | 0.486 | 0.655 (9)  | 3.373 (6)  | 0.025 (7)                   | $4.576 \times 10^{-6}$  | 0.145                   |
| rs551714    | 13  | 20436464  |                | 2.381 (0.02)                    | 3.659         | 0.28  | 0.221      | 2.838      | 0.086 (20)                  | $1.021 \times 10^{-4}$  | 0.49                    |
| rs1711029   | 15  | 51491702  |                | 2.742 ( $6.1 \times 10^{-3}$ )  | 4.722         | 0.971 | 2.145 (4)  | 3.424 (5)  | 0.011 (5)                   | $3.406 \times 10^{-6}$  | 0.058                   |
| rs1054028   | 16  | 22834715  |                | 3.063 ( $2.2 \times 10^{-3}$ )  | 3.222         | 0.302 | 0.322 (15) | 3.127 (13) | 0.074 (15)                  | $1.903 \times 10^{-5}$  | 0.458                   |
| rs7193144   | 16  | 52368187  | <i>FTO</i>     | 2.469 (0.01)                    | 3.622         | 0.29  | 0.245      | 2.888      | 0.081 (18)                  | $7.761 \times 10^{-5}$  | 0.491                   |
| rs8050136   | 16  | 52373776  | <i>FTO</i>     | 2.575 (0.01)                    | 3.548         | 0.287 | 0.255      | 2.936      | 0.081 (17)                  | $5.855 \times 10^{-5}$  | 0.489                   |
| rs896136    | 17  | 35904973  | <i>IKZF3</i>   | 3.02 ( $2.5 \times 10^{-3}$ )   | 3.122         | 0.23  | 0.231      | 3.061 (16) | 0.094                       | $2.826 \times 10^{-5}$  | $\geq 0.5$              |

Supplementary Table 6: Top 20 SNPs differentiating T2D and RA (MHC removed), considered as subgroups of a general phenotype, for each of four summary statistics. Positions are in NCBI build 36. Because of the large number of SNPs with evidence for differentiating the subgroups, only SNPs with non-zero weights after applying the LDAK procedure are included in this table. Ranks in  $X_2$  (bracketed) are only amongst SNPs with  $X_1 > 0.7$ ; ranks in  $X_3$  and  $X_4$  are amongst all SNPs. The value  $X_1$  is the posterior probability of category 3 membership (SNPs differentiating subgroups);  $X_2$  is the contribution to the pseudo-likelihood ratio from the SNP;  $X_3$  is a weighted geometric mean of  $Z_a$  and  $Z_d$  and  $X_4$  is the conditional false discovery rate for observations  $z_a$  and  $z_d$  at the SNP; that is,  $Pr(H'_0|Z_d \leq |z_d|, |Z_a| \leq |z_a|)$ , where  $H'_0$  is the hypothesis that the SNP has the same population minor allele frequencies in subgroups. P-values are computed based on  $X_3$ , under the null hypothesis that  $(Z_a, Z_d)$  has a joint mixture bivariate Gaussian distribution consistent with  $H_0$ . A value  $X_4 = \alpha$  does not correspond to a false-discovery rate of  $\alpha$  amongst SNPs with  $X_4 \leq \alpha$ ; the corresponding value,  $P(H'_0|X_4 < \alpha)$  is given in the rightmost column. Potential gene associations are marked.

| SNP details                    |     |           |               | Z scores                        |         | Values (rank) |            |            |                             | Summary statistics      |                         |
|--------------------------------|-----|-----------|---------------|---------------------------------|---------|---------------|------------|------------|-----------------------------|-------------------------|-------------------------|
| SNP                            | Chr | Pos       | Gene          | $ Z_d $                         | $ Z_a $ | $X_1$         | $X_2$      | $X_3$      | $X_4$                       | p-val ( $X_3$ )         | FDR ( $X_4$ )           |
| rs6679677                      | 1   | 114105331 | <i>PTPN22</i> | 2.568 (0.01)                    | 9.84    | 1             | 1.994 (8)  | 4.019 (7)  | 0.01 (14)                   | $2.433 \times 10^{-6}$  | 0.045                   |
| rs2476601                      | 1   | 114179091 | <i>PTPN22</i> | 2.649 ( $8.1 \times 10^{-3}$ )  | 9.88    | 1             | 2.224 (7)  | 4.109 (5)  | $8.063 \times 10^{-3}$ (11) | $1.784 \times 10^{-6}$  | 0.035                   |
| rs7554023                      | 1   | 160162988 | <i>ATF6??</i> | 3.625 ( $2.9 \times 10^{-4}$ )  | 1.855   | 0.11          | 0.064      | 2.899      | 0.012 (18)                  | $1.529 \times 10^{-4}$  | 0.054                   |
| X2-204400444-<br>-CA-DELETION  | 2   | 204400444 | <i>CTLA4</i>  | 2.142 (0.03)                    | 8.822   | 1             | 1.015 (11) | 3.435 (10) | 0.044                       | $1.803 \times 10^{-5}$  | 0.193                   |
| X2-204408002-<br>-CCT-DELETION | 2   | 204408002 | <i>CTLA4</i>  | 2.103 (0.04)                    | 8.879   | 1             | 0.907 (12) | 3.399 (12) | 0.041                       | $2.047 \times 10^{-5}$  | 0.179                   |
| rs58716662                     | 2   | 204423821 | <i>CTLA4</i>  | 2.447 (0.01)                    | 5.968   | 1             | 1.93 (9)   | 3.294 (14) | 0.02                        | $3.026 \times 10^{-5}$  | 0.089                   |
| rs78960870                     | 2   | 204458162 | <i>CTLA4</i>  | 2.171 (0.03)                    | 6.143   | 1             | 1.335 (10) | 3.071 (20) | 0.043                       | $7.274 \times 10^{-5}$  | 0.188                   |
| rs13030124                     | 2   | 204402508 | <i>CTLA4</i>  | 2.091 (0.04)                    | 8.871   | 1             | 0.879 (13) | 3.385 (13) | 0.042                       | $2.146 \times 10^{-5}$  | 0.184                   |
| rs3997876                      | 2   | 179005067 | <i>PRKRA</i>  | 7.863 ( $3.8 \times 10^{-15}$ ) | 10.102  | 1             | 25.336 (1) | 8.548 (1)  | $3.008 \times 10^{-14}$ (1) | $8.23 \times 10^{-17}$  | $1.046 \times 10^{-13}$ |
| rs3997878                      | 2   | 179004872 | <i>PRKRA</i>  | 7.358 ( $1.9 \times 10^{-13}$ ) | 9.467   | 1             | 22.077 (2) | 8.003 (2)  | $1.777 \times 10^{-12}$ (2) | $5.231 \times 10^{-15}$ | $6.2 \times 10^{-12}$   |
| rs6720771                      | 2   | 154461782 |               | 4.091 ( $4.3 \times 10^{-5}$ )  | 0.428   | 0.05          | 0.051      | 1.927      | 0.015 (20)                  | 0.011                   | 0.065                   |
| rs6723546                      | 2   | 154617139 |               | 4.137 ( $3.5 \times 10^{-5}$ )  | 0.76    | 0.07          | 0.065      | 2.352      | $8.97 \times 10^{-3}$ (12)  | $1.833 \times 10^{-3}$  | 0.039                   |
| rs12638263                     | 3   | 187278549 | <i>BCL6</i>   | 3.459 ( $5.4 \times 10^{-4}$ )  | 2.263   | 0.176         | 0.116      | 3.003      | 0.011 (17)                  | $9.761 \times 10^{-5}$  | 0.05                    |
| rs34244025                     | 9   | 138290559 | <i>ESP33</i>  | 4.649 ( $3.3 \times 10^{-6}$ )  | 1.426   | 0.414         | 0.497      | 3.135 (19) | $6.905 \times 10^{-4}$ (6)  | $5.625 \times 10^{-5}$  | $2.932 \times 10^{-3}$  |
| rs34775390                     | 9   | 138293196 | <i>ESP33</i>  | 4.595 ( $4.3 \times 10^{-6}$ )  | 1.508   | 0.414         | 0.494      | 3.169 (18) | $6.897 \times 10^{-4}$ (5)  | $4.904 \times 10^{-5}$  | $2.923 \times 10^{-3}$  |
| rs6582394                      | 12  | 40972456  |               | 3.247 ( $1.2 \times 10^{-3}$ )  | 2.504   | 0.199         | 0.126      | 2.977      | 0.014 (19)                  | $1.093 \times 10^{-4}$  | 0.061                   |
| rs10220315                     | 14  | 80197971  | <i>CEP128</i> | 2.947 ( $3.2 \times 10^{-3}$ )  | 4.818   | 0.999         | 2.934      | 3.472 (9)  | $5.334 \times 10^{-3}$ (8)  | $1.576 \times 10^{-5}$  | 0.024                   |
| rs10136185                     | 14  | 80210225  | <i>CEP128</i> | 2.954 ( $3.1 \times 10^{-3}$ )  | 4.579   | 0.996         | 2.85       | 3.419 (11) | $5.943 \times 10^{-3}$ (9)  | $1.912 \times 10^{-5}$  | 0.027                   |
| rs78304225                     | 14  | 80276765  | <i>CEP128</i> | 2.853 ( $4.3 \times 10^{-3}$ )  | 4.249   | 0.977         | 2.341      | 3.258 (15) | 0.011 (16)                  | $3.453 \times 10^{-5}$  | 0.047                   |
| rs327443                       | 14  | 80291769  | <i>CEP128</i> | 3.331 ( $8.7 \times 10^{-4}$ )  | 6.025   | 1             | 4.141 (5)  | 4.059 (6)  | $1.628 \times 10^{-3}$ (7)  | $2.122 \times 10^{-6}$  | $7.152 \times 10^{-3}$  |
| rs327465                       | 14  | 80299793  | <i>CEP128</i> | 4.731 ( $2.2 \times 10^{-6}$ )  | 6.653   | 1             | 8.77 (4)   | 5.301 (4)  | $7.38 \times 10^{-6}$ (4)   | $1.677 \times 10^{-8}$  | $2.329 \times 10^{-5}$  |
| rs55957493                     | 14  | 80539807  | <i>CEP128</i> | 5.634 ( $1.8 \times 10^{-8}$ )  | 9.916   | 1             | 13.509 (3) | 6.803 (3)  | $2.346 \times 10^{-8}$ (3)  | $8.75 \times 10^{-12}$  | $7.965 \times 10^{-8}$  |
| rs17545310                     | 14  | 80540892  | <i>CEP128</i> | 2.844 ( $4.5 \times 10^{-3}$ )  | 6.223   | 1             | 2.882 (6)  | 3.692 (8)  | $7.092 \times 10^{-3}$ (10) | $7.401 \times 10^{-6}$  | 0.031                   |
| rs2284734                      | 14  | 80623486  | <i>CEP128</i> | 2.81 ( $5 \times 10^{-3}$ )     | 4.358   | 0.984         | 2.366      | 3.253 (16) | 0.011 (15)                  | $3.53 \times 10^{-5}$   | 0.047                   |
| rs2284735                      | 14  | 80623539  | <i>CEP128</i> | 2.99 ( $2.8 \times 10^{-3}$ )   | 3.781   | 0.899         | 1.764      | 3.234 (17) | $9.448 \times 10^{-3}$ (13) | $3.782 \times 10^{-5}$  | 0.041                   |

Supplementary Table 7: Top 20 SNPs differentiating Graves' disease and Hashimoto's thyroiditis (MHC removed), considered as subgroups of autoimmune thyroid disease, for each of four summary statistics. Positions are in NCBI build 37. Because of the density of the genotyping chip used and the large number of SNPs with evidence of differentiating the subgroups, with non-zero weights after applying the LDAK procedure are included in this table. The column 'LDAK' gives the weight attributed to the SNP by the LDAK procedure. Ranks in  $X_2$  (bracketed) are only amongst SNPs with  $X_1 > 0.7$ ; ranks in  $X_3$  and  $X_4$  are amongst all SNPs. The value  $X_1$  is the posterior probability of category 3 membership (SNPs differentiating subgroups);  $X_2$  is the contribution to the pseudo-likelihood ratio from the SNP;  $X_3$  is a weighted geometric mean of  $Z_a$  and  $Z_d$  and  $X_4$  is the conditional false discovery rate for observations  $z_a$  and  $z_d$  at the SNP; that is,  $Pr(H'_0|Z_d) \leq |z_d|, |Z_a| \leq |z_a|$ , where  $H'_0$  is the hypothesis that the SNP has the same population minor allele frequencies in subgroups. P-values are computed based on  $X_3$ , under the null hypothesis that  $(Z_a, Z_d)$  has a joint mixture bivariate Gaussian distribution consistent with  $H_0$ . A value  $X_4 = \alpha$  does not correspond to a false-discovery rate of  $\alpha$  amongst SNPs with  $X_4 \leq \alpha$ ; the corresponding value,  $P(H'_0|X_4 < \alpha)$  is given in the rightmost column. Potential gene associations are marked.



| SNP details |     |           | Z scores       |                                | Values (rank) |       |            |            | Summary statistics |                        |               |
|-------------|-----|-----------|----------------|--------------------------------|---------------|-------|------------|------------|--------------------|------------------------|---------------|
| SNP         | Chr | Pos       | Gene           | $ Z_d $ (p)                    | $ z_a $       | $X_1$ | $X_2$      | $X_3$      | $X_4$              | p-val ( $X_3$ )        | FDR ( $X_4$ ) |
| rs231790    | 2   | 204408819 | <i>CTLA4</i>   | 3.465 ( $5.3 \times 10^{-4}$ ) | 5.584         | 0.979 | 2.672 (6)  | 3.825      | 0.047              | $2.179 \times 10^{-6}$ | 0.067         |
| rs231797    | 2   | 204414352 | <i>CTLA4</i>   | 3.466 ( $5.3 \times 10^{-4}$ ) | 5.567         | 0.979 | 2.677 (5)  | 3.824      | 0.047              | $2.204 \times 10^{-6}$ | 0.069         |
| rs231804    | 2   | 204416891 | <i>CTLA4</i>   | 3.046 ( $2.3 \times 10^{-3}$ ) | 6.22          | 0.925 | 1.764      | 3.531      | 0.031 (6)          | $1.07 \times 10^{-5}$  | 0.034         |
| rs11571304  | 2   | 204417021 | <i>CTLA4</i>   | 3.047 ( $2.3 \times 10^{-3}$ ) | 6.22          | 0.925 | 1.764      | 3.532      | 0.032 (7)          | $1.064 \times 10^{-5}$ | 0.036         |
| rs3087243   | 2   | 204447164 | <i>CTLA4</i>   | 3.355 ( $7.9 \times 10^{-4}$ ) | 6.606         | 0.94  | 2.163 (10) | 3.86 (7)   | 0.036              | $1.812 \times 10^{-6}$ | 0.044         |
| rs6748358   | 2   | 204465150 | <i>CTLA4</i>   | 3.395 ( $6.9 \times 10^{-4}$ ) | 5.887         | 0.969 | 2.471 (9)  | 3.805      | 0.044              | $2.45 \times 10^{-6}$  | 0.062         |
| rs7596727   | 2   | 204491827 | <i>CTLA4</i>   | 3.578 ( $3.5 \times 10^{-4}$ ) | 5.065         | 0.987 | 2.958 (2)  | 3.845 (9)  | 0.044              | $1.946 \times 10^{-6}$ | 0.062         |
| rs2352551   | 2   | 204503002 | <i>CTLA4</i>   | 3.558 ( $3.7 \times 10^{-4}$ ) | 5.247         | 0.986 | 2.904 (3)  | 3.856 (8)  | 0.043              | $1.845 \times 10^{-6}$ | 0.059         |
| rs3757247   | 6   | 91014184  | <i>BACH2</i>   | 4.037 ( $5.4 \times 10^{-5}$ ) | 3.683         | 0.952 | 2.611 (7)  | 3.961 (4)  | 0.015 (2)          | $1.046 \times 10^{-6}$ | 0.017         |
| rs11755527  | 6   | 91014952  | <i>BACH2</i>   | 4.105 ( $4 \times 10^{-5}$ )   | 3.936         | 0.98  | 3.265 (1)  | 4.069 (1)  | 0.015 (1)          | $5.814 \times 10^{-7}$ | 0.016         |
| rs619192    | 6   | 91025670  | <i>BACH2</i>   | 3.135 ( $1.7 \times 10^{-3}$ ) | 4.791         | 0.971 | 2.124      | 3.423      | 0.03 (5)           | $1.913 \times 10^{-5}$ | 0.032         |
| rs1847472   | 6   | 91029880  | <i>BACH2</i>   | 3.465 ( $5.3 \times 10^{-4}$ ) | 4.389         | 0.975 | 2.579 (8)  | 3.638      | 0.02 (3)           | $5.968 \times 10^{-6}$ | 0.024         |
| rs604912    | 6   | 91043041  | <i>BACH2</i>   | 3.144 ( $1.7 \times 10^{-3}$ ) | 4.762         | 0.971 | 2.137      | 3.426      | 0.033 (9)          | $1.866 \times 10^{-5}$ | 0.039         |
| rs17251453  | 12  | 91026211  |                | 4.26 ( $2 \times 10^{-5}$ )    | 2.593         | 0.674 | 0.831      | 3.844 (10) | 0.071              | $1.951 \times 10^{-6}$ | 0.12          |
| rs12426486  | 12  | 91052228  |                | 4.433 ( $9.3 \times 10^{-6}$ ) | 2.671         | 0.788 | 1.171      | 3.992 (2)  | 0.053              | $8.797 \times 10^{-7}$ | 0.079         |
| rs7334298   | 13  | 41359622  |                | 4.442 ( $8.9 \times 10^{-6}$ ) | 2.566         | 0.752 | 1.013      | 3.965 (3)  | 0.066              | $1.017 \times 10^{-6}$ | 0.107         |
| rs9525555   | 13  | 41408305  |                | 4.44 ( $9 \times 10^{-6}$ )    | 2.525         | 0.735 | 0.948      | 3.951 (5)  | 0.037              | $1.102 \times 10^{-6}$ | 0.048         |
| rs9532960   | 13  | 41443676  |                | 4.377 ( $1.2 \times 10^{-5}$ ) | 2.418         | 0.657 | 0.727      | 3.871 (6)  | 0.033 (8)          | $1.696 \times 10^{-6}$ | 0.038         |
| rs16967120  | 15  | 36707739  | <i>RASGRP1</i> | 3.088 ( $2 \times 10^{-3}$ )   | 4.359         | 0.949 | 1.896      | 3.317      | 0.035 (10)         | $3.361 \times 10^{-5}$ | 0.043         |
| rs2839511   | 21  | 42721590  | <i>UBASH3A</i> | 3.533 ( $4.1 \times 10^{-4}$ ) | 4.47          | 0.981 | 2.76 (4)   | 3.709      | 0.029 (4)          | $4.072 \times 10^{-6}$ | 0.03          |

Supplementary Table 8: Top ten SNPs differentiating TPOA positive and negative T1D (MHC removed), for each of four summary statistics. Positions are in NCBI build 36. Only SNPs with positive weights after applying the LDAK procedure (and therefore used in fitting the model) were considered here. Ranks in  $X_2$  (bracketed) are only amongst SNPs with  $X_1 > 0.7$ ; ranks in  $X_3$  and  $X_4$  are amongst all SNPs. The value  $X_1$  is the posterior probability of category 3 membership (SNPs differentiating subgroups);  $X_2$  is the contribution to the pseudo-likelihood ratio from the SNP;  $X_3$  is a weighted geometric mean of  $Z_a$  and  $Z_d$  and  $X_4$  is the conditional false discovery rate for observations  $z_a$  and  $z_d$  at the SNP; that is,  $Pr(H_0 || Z_d| \leq |z_d|, |Z_a| \leq |z_a|)$ , where  $H_0$  is the hypothesis that the SNP has the same population minor allele frequencies in subgroups. P-values are computed based on  $X_3$ , under the null hypothesis that ( $Z_a, Z_d$ ) has a joint mixture bivariate Gaussian distribution consistent with  $H_0$ . A value  $X_4 = \alpha$  does not correspond to a false-discovery rate of  $\alpha$  amongst SNPs with  $X_4 \leq \alpha$ ; the corresponding value,  $P(H_0 | X_4 < \alpha)$  is given in the rightmost column. Potential gene associations are marked.

| SNP details |     |           | Z scores     |                                | Values (rank) |                        |            |            | Summary statistics |                        |               |
|-------------|-----|-----------|--------------|--------------------------------|---------------|------------------------|------------|------------|--------------------|------------------------|---------------|
| SNP         | Chr | Pos       | Gene         | $ Z_d $ (p)                    | $ Z_a $       | $X_1$                  | $X_2$      | $X_3$      | $X_4$              | p-val ( $X_3$ )        | FDR ( $X_4$ ) |
| rs231790    | 2   | 204408819 | <i>CTLA4</i> | 2.815 ( $4.9 \times 10^{-3}$ ) | 5.584         | 0.971                  | 1.953 (7)  | 2.978      | 0.143              | $7.2 \times 10^{-4}$   | 0.146         |
| rs231797    | 2   | 204414352 | <i>CTLA4</i> | 2.795 ( $5.2 \times 10^{-3}$ ) | 5.567         | 0.971                  | 1.924 (8)  | 2.957      | 0.117              | $7.831 \times 10^{-4}$ | 0.117         |
| rs11571293  | 2   | 204425958 | <i>CTLA4</i> | 2.834 ( $4.6 \times 10^{-3}$ ) | 5.995         | 0.966                  | 2.044 (4)  | 3.013      | 0.271              | $6.162 \times 10^{-4}$ | 0.447         |
| rs6748358   | 2   | 204465150 | <i>CTLA4</i> | 2.847 ( $4.4 \times 10^{-3}$ ) | 5.887         | 0.968                  | 2.048 (3)  | 3.022      | 0.282              | $5.989 \times 10^{-4}$ | 0.494         |
| rs7596727   | 2   | 204491827 | <i>CTLA4</i> | 2.944 ( $3.2 \times 10^{-3}$ ) | 5.065         | 0.978                  | 1.977 (6)  | 3.078      | 0.204              | $4.648 \times 10^{-4}$ | 0.276         |
| rs2352551   | 2   | 204503002 | <i>CTLA4</i> | 2.949 ( $3.2 \times 10^{-3}$ ) | 5.247         | 0.978                  | 2.042 (5)  | 3.091      | 0.364              | $4.349 \times 10^{-4}$ | $\geq 0.5$    |
| rs1560418   | 3   | 159972335 |              | 4.541 ( $5.6 \times 10^{-6}$ ) | 1.21          | $5.957 \times 10^{-3}$ | 0.11       | 4.075 (10) | 0.082              | $3.168 \times 10^{-6}$ | 0.275         |
| rs1560417   | 3   | 159972476 |              | 4.543 ( $5.5 \times 10^{-6}$ ) | 1.213         | $5.988 \times 10^{-3}$ | 0.11       | 4.078 (9)  | 0.09               | $3.108 \times 10^{-6}$ | 0.088         |
| rs511198    | 4   | 116234541 |              | 4.685 ( $2.8 \times 10^{-6}$ ) | 1.858         | 0.025                  | 0.131      | 4.344 (3)  | 0.039 (4)          | $6.607 \times 10^{-7}$ | 0.137         |
| rs506851    | 4   | 116234970 |              | 4.746 ( $2.1 \times 10^{-6}$ ) | 1.956         | 0.033                  | 0.141      | 4.413 (1)  | 0.07 (10)          | $4.33 \times 10^{-7}$  | 0.227         |
| rs503256    | 4   | 116244902 |              | 4.645 ( $3.4 \times 10^{-6}$ ) | 1.832         | 0.023                  | 0.128      | 4.305 (5)  | 0.037 (3)          | $8.292 \times 10^{-7}$ | 0.131         |
| rs473989    | 4   | 116246844 |              | 4.687 ( $2.8 \times 10^{-6}$ ) | 1.781         | 0.021                  | 0.128      | 4.33 (4)   | 0.045 (7)          | $7.184 \times 10^{-7}$ | 0.166         |
| rs505277    | 4   | 116248257 |              | 4.634 ( $3.6 \times 10^{-6}$ ) | 1.81          | 0.022                  | 0.127      | 4.29 (6)   | 0.033 (1)          | $9.08 \times 10^{-7}$  | 0.113         |
| rs1507935   | 4   | 116368809 |              | 4.586 ( $4.5 \times 10^{-6}$ ) | 1.514         | 0.011                  | 0.116      | 4.188 (7)  | 0.055 (8)          | $1.644 \times 10^{-6}$ | 0.168         |
| rs867036    | 4   | 116381578 |              | 4.581 ( $4.6 \times 10^{-6}$ ) | 1.515         | 0.011                  | 0.115      | 4.184 (8)  | 0.056 (9)          | $1.709 \times 10^{-6}$ | 0.172         |
| rs7694946   | 4   | 116413588 |              | 4.693 ( $2.7 \times 10^{-6}$ ) | 1.963         | 0.032                  | 0.138      | 4.37 (2)   | 0.088              | $5.593 \times 10^{-7}$ | 0.096         |
| rs706781    | 10  | 6126391   | <i>IL2RA</i> | 3.098 ( $1.9 \times 10^{-3}$ ) | 4.515         | 0.964                  | 1.862 (10) | 3.195      | 0.401              | $2.764 \times 10^{-4}$ | $\geq 0.5$    |
| rs907092    | 17  | 35175785  | <i>IKZF3</i> | 3.746 ( $1.8 \times 10^{-4}$ ) | 4.221         | 0.958                  | 2.227 (1)  | 3.783      | 0.045 (6)          | $1.565 \times 10^{-5}$ | 0.163         |
| rs11078927  | 17  | 35317931  | <i>IKZF3</i> | 3.774 ( $1.6 \times 10^{-4}$ ) | 4.168         | 0.951                  | 2.175 (2)  | 3.805      | 0.045 (5)          | $1.392 \times 10^{-5}$ | 0.161         |
| rs4795400   | 17  | 35320546  | <i>IKZF3</i> | 3.569 ( $3.6 \times 10^{-4}$ ) | 4.106         | 0.927                  | 1.868 (9)  | 3.61       | 0.035 (2)          | $3.785 \times 10^{-5}$ | 0.121         |

Supplementary Table 9: Top ten SNPs with differing effect sizes with age at diagnosis in T1D (MHC removed), for each of four summary statistics. Positions are in NCBI build 36. Only SNPs with positive weights after applying the LDAK procedure (and therefore used in fitting the model) were considered here. Ranks in  $X_2$  (bracketed) are only amongst SNPs with  $X_1 > 0.7$ ; ranks in  $X_3$  and  $X_4$  are amongst all SNPs. The value  $X_1$  is the posterior probability of category 3 membership (SNPs differentiating subgroups);  $X_2$  is the contribution to the pseudo-likelihood ratio from the SNP;  $X_3$  is a weighted geometric mean of  $Z_a$  and  $Z_d$  and  $X_4$  is the conditional false discovery rate for observations  $z_a$  and  $z_d$  at the SNP; that is,  $Pr(H_0 | |Z_d| \leq |z_d|, |Z_a| \leq |z_a|)$ , where  $H_0$  is the hypothesis that the SNP has the same population minor allele frequencies in subgroups. P-values are computed based on  $X_3$ , under the null hypothesis that  $(Z_a, Z_d)$  has a joint mixture bivariate Gaussian distribution consistent with  $H_0$ . A value  $X_4 = \alpha$  does not correspond to a false-discovery rate of  $\alpha$  amongst SNPs with  $X_4 \leq \alpha$ ; the corresponding value,  $P(H_0 | X_4 < \alpha)$  is given in the rightmost column. Potential gene associations are marked.
